# Supplementary material for: RNA sequencing identifies specific PIWI-interacting small non-coding RNA expression patterns in breast cancer
Source: PubMed Central journal article supplement (PMC4259446; doi:10.18632/oncotarget.2476), 2014-09-16
Supplement: oncotarget-05-9901-s002.pdf [file oncotarget-05-9901-s002.pdf]

# **RNA sequencing identifies specific PIWI-interacting small non-coding RNA expression patterns in breast cancer**

A. Hashim *et al.*

**SUPPLEMENTARY TABLES S1-S7**

**Supplementary Table S1A:** Oligonucleotides used for quantitative real-time rtPCR analysis of piRNA pathway gene expression. For each oligonucleotide primer, sequence and accession number are reported.

| <b>Gene</b>   | <b>Oligo Name</b> | <b>Sequence</b>        | <b>Acc. N.er</b> |
|---------------|-------------------|------------------------|------------------|
| <i>Asz1</i>   | ASZ1_QF           | CTGCTCGAGATGGTCACACC   | NM_130768.2      |
|               | ASZ1_QR           | TGCCACAGTTAAAGCAGTGT   |                  |
| <i>Ddx4</i>   | DDX4_QF           | GTTTTCCAAGAGAGGCGGCTA  | NM_024415.2      |
|               | DDX4_QR           | TAGACCAAATCCTCCACGGC   |                  |
| <i>Hen1</i>   | HEN1_QF           | AAGGTTGCAGACCTGGGATG   | NM_144584.2      |
|               | HEN1_QR           | ACGAATCCCCTCTCCATCGT   |                  |
| <i>Mael</i>   | MAEL1_QF          | CATTGTCAGGCTGCAAGTGA   | NM_032858.1      |
|               | MAEL1_QR          | CAGTTCCTGGGTTGGGATG    |                  |
| <i>Pdl6</i>   | PDL6_QF           | CTGCGCAAGGCAGGGATCCAG  | NM_178836.3      |
|               | PDL6_QR           | GCGAGCCAGTGATGAGCACCC  |                  |
| <i>Piwil1</i> | PIWIL1_QF         | ACGAAGTGCCACAGTTTTTGG  | NM_004764.4      |
|               | PIWIL1_QR         | AGTCTTCCTCCAGACTGAGC   |                  |
| <i>Piwil2</i> | PIWIL2_QF         | GCCTGGGTGAACTAAAGGA    | NM_018068.3      |
|               | PIWIL2_QR         | CCATGATGATGCAAACAACC   |                  |
| <i>Piwil3</i> | PIWIL3_QF         | TCAGATGGCAGCAAATCAC    | NM_001255975.1   |
|               | PIWIL3_QR         | ACGTTGTGTACCCGTTAGGC   |                  |
| <i>Piwil4</i> | PIWIL4_QF         | ATGGCACCGAGATCACCTAT   | NM_152431.2      |
|               | PIWIL4_QR         | GCTGAGCCTCACTGTTGTCA   |                  |
| <i>Prmt5</i>  | PRMT5_QF          | GGTCTTCAGCTTTCCTGCT    | NM_006109.3      |
|               | PRMT5_QR          | TACCCGCATCCAGAACATGG   |                  |
| <i>Tdrd1</i>  | TDRD1_QF          | AAATCCGAGACGCCTCATGT   | NM_198795.1      |
|               | TDRD1_QR          | ACCCAAGGGAACACTGGTTT   |                  |
| <i>Tdrd2</i>  | TDRD2_QF          | CGGACTTCTTGACAAGCCT    | NM_001083965     |
|               | TDRD2_QR          | AATGTCAGCCGCTCTTCTCT   |                  |
| <i>Tdrd6</i>  | TDRD6_QF          | GAGTCCACCTGAGAAAAGGGG  | NM_001010870.2   |
|               | TDRD6_QR          | TTGGTCTGCGTAAGATGCCA   |                  |
| <i>Tdrd9</i>  | TDRD9_QF          | TGCGTTCGAAAGGTCACTCA   | NM_153046.2      |
|               | TDRD9_QR          | AAAGATGGCCTTGGACCTGG   |                  |
| <i>Tub1a</i>  | TUB_QF            | GACCGCCTAAGAGTCGCGCTG  | NM_006009.3      |
|               | TUB_QR            | GCACTCACGCATGGTTGCTGCT |                  |
| <i>Wdr77</i>  | WDR77_QF          | CGGCTCCCTCTGGCTTTTTA   | NM_024102.2      |
|               | WDR77_QR          | AACAGCACCTGAATCGGAGG   |                  |

**Supplementary Table S1B:** Data relative to expression of transcripts encoding known components of the piRNA biogenesis pathway for additional breast cancer cell lines derived from NCI-60 dataset. For each given transcript, the total numbers of probes of the microarray that scored positive upon hybridization and of those that passed quality control are reported, together with log<sub>2</sub> values of minimum, maximum and average fluorescence intensity detected, and corresponding average Z score.

| Transcript | Total probes found | Probes that passed quality control | Transcript probe log <sub>2</sub> intensities |         | Average transcript probe log <sub>2</sub> intensities |            |        |        |      | Average transcript intensity Z scores |            |        |        |       |
|------------|--------------------|------------------------------------|-----------------------------------------------|---------|-------------------------------------------------------|------------|--------|--------|------|---------------------------------------|------------|--------|--------|-------|
|            |                    |                                    | Minimum                                       | Maximum | MCF7                                                  | MDA_MB_231 | HS578T | BT_549 | T47D | MCF7                                  | MDA_MB_231 | HS578T | BT_549 | T47D  |
| Asz1       | 20                 | 3                                  | 2.41                                          | 4.19    | 2.82                                                  | 2.76       | 3.32   | 2.65   | 3.01 | -0.55                                 | -0.84      | 0.73   | -1.09  | -0.16 |
| Ddx1       | 35                 | 6                                  | 2.09                                          | 3.54    | 2.63                                                  | 2.48       | 2.51   | 2.48   | 2.73 | 0.11                                  | -0.38      | -0.36  | -0.48  | 0.46  |
| Mael       | 40                 | 8                                  | 2.46                                          | 5.95    | 3.13                                                  | 5.95       | 3.16   | 3.05   | 3.06 | -0.28                                 | 4.84       | -0.28  | -0.43  | -0.33 |
| Piwil1     | 163                | 52                                 | 3.29                                          | 8.74    | 4.04                                                  | 3.91       | 3.98   | 3.96   | 3.91 | -0.15                                 | -0.28      | -0.17  | -0.23  | -0.28 |
| Piwil2     | 51                 | 8                                  | 3.38                                          | 5.72    | 3.91                                                  | 4.22       | 4.24   | 4.17   | 3.98 | -0.81                                 | -0.12      | -0.11  | -0.18  | -0.53 |
| Piwil3     | 44                 | 6                                  | 3.01                                          | 4.53    | 3.95                                                  | 3.71       | 3.49   | 3.76   | 3.83 | 0.83                                  | 0.16       | -0.63  | 0.2    | 0.48  |
| Piwil4     | 70                 | 29                                 | 2.96                                          | 8.79    | 3.55                                                  | 3.95       | 3.5    | 3.69   | 3.42 | -0.5                                  | -0.13      | -0.54  | -0.36  | -0.63 |
| Prmt5      | 37                 | 27                                 | 8.41                                          | 10.67   | 9.83                                                  | 9.82       | 8.94   | 10     | 9.27 | 0.31                                  | 0.27       | -1.47  | 0.65   | -0.76 |
| Tdrd1      | 61                 | 43                                 | 2.66                                          | 8.21    | 6.96                                                  | 3.12       | 3.16   | 3.26   | 3.38 | 3.94                                  | -0.29      | -0.25  | -0.12  | 0.01  |
| Tdrd6      | 42                 | 7                                  | 2.14                                          | 3.85    | 2.75                                                  | 2.89       | 2.75   | 2.61   | 2.78 | -0.16                                 | 0.21       | -0.23  | -0.63  | -0.15 |
| Tdrd9      | 66                 | 46                                 | 2.87                                          | 7.45    | 3.44                                                  | 3.39       | 3.51   | 3.38   | 3.44 | -0.22                                 | -0.34      | -0.17  | -0.37  | -0.27 |
| Wdr77      | 51                 | 18                                 | 8.8                                           | 10.5    | 9.53                                                  | 10.23      | 9.05   | 9.95   | 9.14 | -0.19                                 | 1.55       | -1.35  | 0.88   | -1.14 |

**Supplementary Table S2:** Overview of small RNA sequencing libraries generated for this study. For each library, number of reads before and after adapter cleavage and reads mapped in each category of sncRNA are shown.

| Cell line  | Raw read count | Filtered read count | Annotation categories |            |        |            |       |            |       |            |
|------------|----------------|---------------------|-----------------------|------------|--------|------------|-------|------------|-------|------------|
|            |                |                     | miRNAs                |            | piRNAs |            | tRNAs |            | rRNAs |            |
|            |                |                     | N.er                  | Read count | N.er   | Read count | N.er  | Read count | N.er  | Read count |
| MCF10A     | 25,018,240     | 23,988,675          | 738                   | 12,318,726 | 138    | 185,475    | 127   | 63,334     | 4     | 761,097    |
| MCF-7      | 13,019,082     | 11,784,358          | 593                   | 7,026,882  | 78     | 61,591     | 75    | 12,140     | 4     | 277,845    |
| ZR-75.1    | 22,893,597     | 21,540,490          | 725                   | 17,471,939 | 117    | 139,784    | 102   | 74,408     | 4     | 333,211    |
| SKBR3      | 9,056,994      | 7,201,109           | 492                   | 3,134,331  | 75     | 30,572     | 47    | 8,733      | 4     | 242,998    |
| MCF-7_G_1  | 4,327,501      | 3,506,994           | 472                   | 2,310,200  | 60     | 19,277     | 37    | 3,789      | 4     | 87,828     |
| MCF-7_G_2  | 4,337,535      | 3,574,145           | 469                   | 2,314,040  | 58     | 20,213     | 44    | 3,773      | 4     | 89,831     |
| MCF-7_G_3  | 4,354,046      | 3,618,196           | 476                   | 2,374,218  | 55     | 21,094     | 40    | 3,930      | 4     | 93,430     |
| MCF-7_A_1  | 6,071,484      | 5,385,738           | 460                   | 4,626,169  | 57     | 21,679     | 32    | 9,535      | 4     | 70,304     |
| MCF-7_A_2  | 6,075,950      | 5,447,209           | 467                   | 4,621,007  | 57     | 22,259     | 33    | 8,960      | 4     | 73,592     |
| MCF-7_A_3  | 6,085,784      | 5,476,334           | 473                   | 4,725,976  | 58     | 22,742     | 32    | 8,992      | 4     | 76,606     |
| Ct-ERβ_G_1 | 2,849,255      | 2,476,261           | 420                   | 2,037,155  | 48     | 13,087     | 33    | 3,974      | 4     | 59,213     |
| Ct-ERβ_G_2 | 2,851,956      | 2,511,218           | 421                   | 2,036,288  | 49     | 13,647     | 37    | 3,839      | 4     | 61,261     |
| Ct-ERβ_G_3 | 2,860,905      | 2,534,085           | 427                   | 2,087,819  | 52     | 14,527     | 35    | 4,034      | 4     | 63,161     |
| Ct-ERβ_A_1 | 4,197,268      | 3,569,321           | 427                   | 2,781,283  | 62     | 19,398     | 32    | 10,586     | 4     | 121,570    |
| Ct-ERβ_A_2 | 4,203,850      | 3,624,841           | 436                   | 2,786,073  | 62     | 20,036     | 37    | 10,038     | 4     | 125,795    |
| Ct-ERβ_A_3 | 4,232,281      | 3,667,198           | 444                   | 2,863,947  | 64     | 20,691     | 34    | 10,267     | 4     | 131,566    |
| Nt-ERβ_G_1 | 4,364,662      | 3,783,073           | 454                   | 3,126,539  | 59     | 19,594     | 43    | 6,671      | 4     | 117,795    |
| Nt-ERβ_G_2 | 4,383,706      | 3,843,922           | 458                   | 3,134,747  | 63     | 20,165     | 44    | 6,674      | 4     | 121,431    |
| Nt-ERβ_G_3 | 4,391,850      | 3,870,049           | 457                   | 3,204,734  | 61     | 21,304     | 43    | 6,859      | 4     | 126,843    |
| Nt-ERβ_A_1 | 6,193,051      | 5,490,264           | 459                   | 4,732,554  | 60     | 19,414     | 40    | 10,032     | 4     | 89,061     |
| Nt-ERβ_A_2 | 6,197,557      | 5,554,537           | 454                   | 4,727,273  | 58     | 19,670     | 46    | 9,697      | 4     | 91,860     |
| Nt-ERβ_A_3 | 6,208,568      | 5,584,789           | 469                   | 4,833,239  | 58     | 20,838     | 40    | 10,036     | 4     | 95,392     |

**Supplementary Table S3A:** Number of raw (not normalized) reads that mapped to each identified piRNA in the library from *wt*-MCF7 cells. piRNAs are named in accordance to NCBI accession number.

| <b>NCBI Accession</b> | <b>Raw read count</b> |
|-----------------------|-----------------------|
| DQ587153              | 11370                 |
| DQ595186              | 8291                  |
| DQ598677              | 6688                  |
| DQ597484              | 3616                  |
| DQ590013              | 3551                  |
| DQ596805              | 3251                  |
| DQ594556              | 2377                  |
| DQ593039              | 2339                  |
| DQ593538              | 2209                  |
| DQ571526              | 2162                  |
| DQ597945              | 2151                  |
| DQ597347              | 1553                  |
| DQ571524              | 1360                  |
| DQ598675              | 1170                  |
| DQ570687              | 1057                  |
| DQ597482              | 1017                  |
| DQ590548              | 840                   |
| DQ595807              | 805                   |
| DQ582264              | 668                   |
| DQ569993              | 610                   |
| DQ570994              | 589                   |
| DQ592931              | 482                   |
| DQ571335              | 422                   |
| DQ593767              | 353                   |
| DQ571500              | 274                   |
| DQ598263              | 243                   |
| DQ596993              | 229                   |
| DQ593744              | 214                   |
| DQ598104              | 205                   |
| DQ598428              | 119                   |
| DQ593574              | 108                   |
| DQ582566              | 94                    |
| DQ587269              | 94                    |
| DQ571003              | 91                    |
| DQ572892              | 84                    |
| DQ571858              | 76                    |
| DQ598646              | 66                    |

|          |    |
|----------|----|
| DQ597997 | 54 |
| DQ598650 | 53 |
| DQ588040 | 52 |
| DQ571419 | 50 |
| DQ570698 | 44 |
| DQ571511 | 42 |
| DQ571591 | 41 |
| DQ597975 | 39 |
| DQ595536 | 36 |
| DQ596992 | 32 |
| DQ593356 | 32 |
| DQ596670 | 27 |
| DQ596932 | 25 |
| DQ597397 | 22 |
| DQ584698 | 21 |
| DQ570540 | 19 |
| DQ601526 | 18 |
| DQ584197 | 18 |
| DQ592932 | 14 |
| DQ575884 | 12 |
| DQ593415 | 12 |
| DQ593752 | 12 |
| DQ571589 | 9  |
| DQ590455 | 7  |
| DQ594740 | 6  |
| DQ570992 | 6  |
| DQ593407 | 6  |
| DQ595023 | 6  |
| DQ596587 | 5  |
| DQ570728 | 5  |
| DQ593636 | 5  |
| DQ570812 | 4  |
| DQ598619 | 4  |
| DQ596155 | 4  |
| DQ570999 | 3  |
| DQ598378 | 3  |
| DQ600174 | 3  |
| DQ600515 | 3  |
| DQ580405 | 3  |
| DQ575660 | 3  |
| DQ598130 | 3  |

**Supplementary Table S3B:** Number of raw (not normalized) reads that mapped to each identified piRNA in the library from SKBR3 cells. piRNAs are named in accordance to NCBI accession number.

| <b>NCBI Accession</b> | <b>Raw read count</b> |
|-----------------------|-----------------------|
| DQ593039              | 7477                  |
| DQ598677              | 4863                  |
| DQ587153              | 4002                  |
| DQ592931              | 1584                  |
| DQ582264              | 1251                  |
| DQ597484              | 1152                  |
| DQ595186              | 1107                  |
| DQ597347              | 985                   |
| DQ593538              | 968                   |
| DQ595807              | 680                   |
| DQ570687              | 664                   |
| DQ597975              | 590                   |
| DQ596993              | 377                   |
| DQ594556              | 324                   |
| DQ569993              | 318                   |
| DQ598104              | 281                   |
| DQ571335              | 279                   |
| DQ590013              | 277                   |
| DQ598675              | 249                   |
| DQ598183              | 236                   |
| DQ571511              | 209                   |
| DQ598263              | 200                   |
| DQ598428              | 197                   |
| DQ596992              | 167                   |
| DQ571500              | 162                   |
| DQ596805              | 151                   |
| DQ596932              | 147                   |
| DQ571858              | 144                   |
| DQ572892              | 127                   |
| DQ598646              | 120                   |
| DQ593767              | 108                   |
| DQ597341              | 97                    |
| DQ597997              | 95                    |
| DQ571419              | 80                    |
| DQ571526              | 79                    |
| DQ570698              | 68                    |

|          |    |
|----------|----|
| DQ593574 | 68 |
| DQ598650 | 60 |
| DQ592932 | 57 |
| DQ571003 | 47 |
| DQ570994 | 43 |
| DQ587269 | 41 |
| DQ593744 | 34 |
| DQ582566 | 31 |
| DQ593356 | 30 |
| DQ571550 | 27 |
| DQ596670 | 24 |
| DQ598167 | 22 |
| DQ584698 | 22 |
| DQ596155 | 21 |
| DQ597482 | 19 |
| DQ596587 | 18 |
| DQ595536 | 17 |
| DQ575884 | 14 |
| DQ571524 | 13 |
| DQ571589 | 13 |
| DQ571823 | 13 |
| DQ576872 | 12 |
| DQ594740 | 11 |
| DQ592953 | 10 |
| DQ597945 | 10 |
| DQ588040 | 9  |
| DQ570540 | 8  |
| DQ571591 | 8  |
| DQ593752 | 7  |
| DQ570728 | 7  |
| DQ593407 | 6  |
| DQ570999 | 6  |
| DQ575660 | 6  |
| DQ596538 | 5  |
| DQ595292 | 4  |
| DQ570940 | 4  |
| DQ598651 | 4  |
| DQ593636 | 3  |
| DQ571388 | 3  |



**Supplementary Table S3C:** Number of raw (not normalized) reads that mapped to each identified piRNA in the library from ZR-75.1 cells. piRNAs are named in accordance to NCBI accession number.

| <b>NCBI Accession</b> | <b>Raw read count</b> |
|-----------------------|-----------------------|
| DQ598677              | 55743                 |
| DQ595186              | 27297                 |
| DQ597945              | 17098                 |
| DQ587153              | 9717                  |
| DQ597347              | 5403                  |
| DQ594556              | 3445                  |
| DQ593039              | 2368                  |
| DQ597484              | 2268                  |
| DQ593538              | 2180                  |
| DQ595807              | 1974                  |
| DQ590548              | 1643                  |
| DQ582264              | 1410                  |
| DQ592931              | 1172                  |
| DQ597975              | 674                   |
| DQ569993              | 645                   |
| DQ571526              | 543                   |
| DQ570994              | 543                   |
| DQ596992              | 518                   |
| DQ597341              | 326                   |
| DQ571500              | 320                   |
| DQ571335              | 302                   |
| DQ596993              | 296                   |
| DQ593767              | 274                   |
| DQ598428              | 255                   |
| DQ587269              | 238                   |
| DQ598263              | 219                   |
| DQ593574              | 214                   |
| DQ593744              | 185                   |
| DQ570687              | 182                   |
| DQ571511              | 164                   |
| DQ572892              | 150                   |
| DQ598104              | 141                   |
| DQ593356              | 128                   |
| DQ582566              | 111                   |
| DQ593407              | 100                   |
| DQ598650              | 93                    |
| DQ571419              | 86                    |

|          |    |
|----------|----|
| DQ588040 | 78 |
| DQ598646 | 76 |
| DQ584197 | 76 |
| DQ597997 | 71 |
| DQ571003 | 65 |
| DQ592932 | 58 |
| DQ571591 | 54 |
| DQ597397 | 44 |
| DQ595536 | 44 |
| DQ598675 | 43 |
| DQ584698 | 43 |
| DQ570698 | 42 |
| DQ590013 | 39 |
| DQ595023 | 39 |
| DQ571858 | 36 |
| DQ593636 | 33 |
| DQ596932 | 31 |
| DQ597403 | 30 |
| DQ570812 | 24 |
| DQ596587 | 24 |
| DQ570540 | 21 |
| DQ593752 | 18 |
| DQ597482 | 18 |
| DQ575884 | 18 |
| DQ594740 | 17 |
| DQ571873 | 15 |
| DQ593415 | 15 |
| DQ601526 | 13 |
| DQ571955 | 11 |
| DQ575746 | 11 |
| DQ577008 | 10 |
| DQ570728 | 10 |
| DQ571589 | 9  |
| DQ570992 | 9  |
| DQ598180 | 8  |
| DQ600174 | 8  |
| DQ590455 | 8  |
| DQ597916 | 8  |
| DQ581533 | 8  |
| DQ571550 | 8  |
| DQ576880 | 7  |
| DQ577356 | 7  |

|          |   |
|----------|---|
| DQ597218 | 7 |
| DQ596805 | 6 |
| DQ590835 | 6 |
| DQ598130 | 6 |
| DQ585261 | 6 |
| DQ600515 | 6 |
| DQ572800 | 6 |
| DQ594577 | 5 |
| DQ597608 | 4 |
| DQ596150 | 4 |
| DQ570999 | 4 |
| DQ594453 | 4 |
| DQ593423 | 4 |
| DQ598294 | 4 |
| DQ596516 | 4 |
| DQ598175 | 4 |
| DQ571425 | 4 |
| DQ571388 | 4 |
| DQ573323 | 4 |
| DQ571823 | 4 |
| DQ575660 | 4 |
| DQ590404 | 4 |
| DQ590830 | 3 |
| DQ598991 | 3 |
| DQ596670 | 3 |
| DQ575827 | 3 |
| DQ596756 | 3 |
| DQ573835 | 3 |
| DQ578783 | 3 |
| DQ587912 | 3 |
| DQ598190 | 3 |
| DQ582593 | 3 |
| DQ594335 | 3 |
| DQ570940 | 3 |
| DQ585669 | 3 |
| DQ592811 | 3 |
| DQ598183 | 3 |
| DQ596155 | 3 |

**Supplementary Table S3D:** Number of raw (not normalized) reads that mapped to each identified piRNA in the library from MCF10A cells. piRNAs are named in accordance to NCBI accession number.

| <b>NCBI Accession</b> | <b>Raw read count</b> |
|-----------------------|-----------------------|
| DQ595186              | 58394                 |
| DQ598677              | 34585                 |
| DQ587153              | 29934                 |
| DQ597347              | 15411                 |
| DQ593039              | 10764                 |
| DQ597484              | 4798                  |
| DQ593538              | 3608                  |
| DQ595807              | 3450                  |
| DQ594556              | 2641                  |
| DQ571526              | 2569                  |
| DQ592931              | 2314                  |
| DQ590548              | 2180                  |
| DQ571335              | 1327                  |
| DQ582264              | 961                   |
| DQ571500              | 895                   |
| DQ570687              | 796                   |
| DQ596993              | 784                   |
| DQ569993              | 760                   |
| DQ590013              | 570                   |
| DQ593744              | 552                   |
| DQ593767              | 543                   |
| DQ598650              | 517                   |
| DQ598428              | 473                   |
| DQ595536              | 454                   |
| DQ593356              | 402                   |
| DQ587269              | 378                   |
| DQ593574              | 352                   |
| DQ596992              | 332                   |
| DQ571511              | 330                   |
| DQ597975              | 295                   |
| DQ598675              | 291                   |
| DQ598651              | 283                   |
| DQ598263              | 260                   |
| DQ582566              | 222                   |
| DQ588040              | 168                   |
| DQ598104              | 164                   |
| DQ570698              | 159                   |
| DQ597482              | 151                   |
| DQ571858              | 149                   |
| DQ597341              | 141                   |

|          |     |
|----------|-----|
| DQ570994 | 129 |
| DQ572892 | 125 |
| DQ571419 | 121 |
| DQ598646 | 114 |
| DQ596932 | 98  |
| DQ594740 | 78  |
| DQ570812 | 78  |
| DQ592932 | 77  |
| DQ597997 | 75  |
| DQ571003 | 65  |
| DQ593752 | 65  |
| DQ584197 | 55  |
| DQ571591 | 50  |
| DQ571955 | 49  |
| DQ575884 | 48  |
| DQ593407 | 47  |
| DQ584698 | 41  |
| DQ596587 | 38  |
| DQ578783 | 33  |
| DQ570540 | 33  |
| DQ570940 | 32  |
| DQ571524 | 31  |
| DQ570992 | 30  |
| DQ571589 | 29  |
| DQ597397 | 26  |
| DQ575660 | 26  |
| DQ596805 | 24  |
| DQ597403 | 22  |
| DQ570728 | 21  |
| DQ600515 | 18  |
| DQ587229 | 16  |
| DQ572800 | 16  |
| DQ597218 | 16  |
| DQ593636 | 15  |
| DQ596155 | 15  |
| DQ598180 | 14  |
| DQ579049 | 14  |
| DQ594465 | 14  |
| DQ598183 | 12  |
| DQ576872 | 11  |
| DQ576900 | 11  |
| DQ590404 | 11  |
| DQ598252 | 10  |
| DQ598008 | 10  |
| DQ598167 | 9   |

|          |   |
|----------|---|
| DQ571873 | 9 |
| DQ577008 | 9 |
| DQ581533 | 8 |
| DQ595292 | 8 |
| DQ601526 | 8 |
| DQ570956 | 8 |
| DQ575746 | 8 |
| DQ570999 | 7 |
| DQ598378 | 6 |
| DQ580854 | 6 |
| DQ571823 | 6 |
| DQ596603 | 6 |
| DQ600174 | 6 |
| DQ573323 | 6 |
| DQ571388 | 6 |
| DQ576659 | 5 |
| DQ600517 | 5 |
| DQ591143 | 5 |
| DQ592953 | 5 |
| DQ594453 | 5 |
| DQ586832 | 5 |
| DQ573352 | 5 |
| DQ577356 | 5 |
| DQ585569 | 4 |
| DQ593621 | 4 |
| DQ576604 | 4 |
| DQ576925 | 4 |
| DQ596538 | 4 |
| DQ598130 | 4 |
| DQ596327 | 4 |
| DQ590830 | 4 |
| DQ571422 | 4 |
| DQ575064 | 3 |
| DQ596097 | 3 |
| DQ596516 | 3 |
| DQ584569 | 3 |
| DQ576880 | 3 |
| DQ571425 | 3 |
| DQ573293 | 3 |
| DQ590455 | 3 |
| DQ578996 | 3 |
| DQ572216 | 3 |
| DQ596756 | 3 |
| DQ579145 | 3 |
| DQ597887 | 3 |

|          |   |
|----------|---|
| DQ597945 | 3 |
| DQ596936 | 3 |
| DQ576766 | 3 |
| DQ571550 | 3 |
| DQ596183 | 3 |
| DQ596670 | 3 |
| DQ576918 | 3 |
| DQ575488 | 3 |

**Supplementary Table S3E:** Genomic distribution of the genes encoding piRNAs expressed in breast cancer or mammary epithelial MCF10A cells. Number of copies and nature of the transcription units where piRNAs mapping to unique genomic locations are encoded are indicated.

| Cell line | piRNAs identified | Multiple copies |            |            | Single copy    |            |            |             |             |             |               |                       |
|-----------|-------------------|-----------------|------------|------------|----------------|------------|------------|-------------|-------------|-------------|---------------|-----------------------|
|           |                   | N.er of piRNAs  | Read count | % of reads | N.er of piRNAs | Read count | % of reads | Inter genic | Intra genic | <i>mRNA</i> | <i>snoRNA</i> | <i>snoRNA in mRNA</i> |
| MCF10A    | 138               | 47              | 21904      | 11.8%      | 91             | 163571     | 88.2%      | 25          | 66          | 25          | 3             | 38                    |
| MCF-7     | 78                | 17              | 9554       | 15.5%      | 61             | 52037      | 84.5%      | 12          | 49          | 10          | 2             | 37                    |
| SKBR3     | 75                | 15              | 1930       | 6.3%       | 60             | 28642      | 93.7%      | 13          | 47          | 11          | 8             | 28                    |
| ZR-75.1   | 117               | 39              | 25418      | 18.2%      | 78             | 114366     | 81.8%      | 17          | 61          | 23          | 2             | 36                    |

**Supplementary Table S3F:** Genomic distribution of the genes encoding human germline piRNAs from piRNABank. Number of copies and nature of the transcription units where piRNAs mapping to unique genomic locations are encoded are indicated.

| Number of piRNAs in piRNABank | Multiple copies |            | Single copy    |            |            |            |             |               |                       |
|-------------------------------|-----------------|------------|----------------|------------|------------|------------|-------------|---------------|-----------------------|
|                               | N.er of piRNAs  | % of reads | N.er of piRNAs | % of reads | Intergenic | Intragenic | <i>mRNA</i> | <i>snoRNA</i> | <i>snoRNA in mRNA</i> |
| 23439                         | 4179            | 17.83%     | 19260          | 82.17%     | 12941      | 6319       | 6203        | 21            | 95                    |



**Supplementary Table S3G:** Summary of piRNAs differentially expressed (p-value  $\leq 0.05$ ) in BC vs mammary epithelial MCF10A cells. Information relative to number of copies and nature of the transcription units where piRNAs mapping to unique genomic locations are encoded are indicated.

| NCBI<br>Accession | MCF-7 vs MCF10A          |       |                |                                   | ZR-75.1 vs MCF10A        |             |                |                                   | SKBR3 vs MCF10A          |       |                |                                   | Copy in<br>the<br>genome | Genomic<br>loci | Name              |
|-------------------|--------------------------|-------|----------------|-----------------------------------|--------------------------|-------------|----------------|-----------------------------------|--------------------------|-------|----------------|-----------------------------------|--------------------------|-----------------|-------------------|
|                   | Normalized read<br>count |       | Fold<br>change | p-value<br>Fisher's<br>exact test | Normalized read<br>count |             | Fold<br>change | p-value<br>Fisher's<br>exact test | Normalized read<br>count |       | Fold<br>change | p-value<br>Fisher's<br>exact test |                          |                 |                   |
|                   | MCF10A                   | MCF-7 |                |                                   | MCF10A                   | ZR-<br>75.1 |                |                                   | MCF10A                   | SKBR3 |                |                                   |                          |                 |                   |
| DQ597347          | 9514                     | 1867  | -5.1           | 0.00E+00                          | 12564                    | 8084        | -1.55          | 1.69E-229                         | 8498                     | 2218  | -3.83          | 0.00E+00                          | multiple                 | N/A             | N/A               |
| DQ571526          | 2366                     | 2366  | 1              | 1.00E+00                          | 2272                     | 667         | -3.41          | 1.83E-205                         | 1625                     | 124   | -13.15         | 0.00E+00                          | multiple                 | N/A             | N/A               |
| DQ590548          | 1867                     | 812   | -2.3           | 1.68E-95                          | 1795                     | 1979        | 1.1            | 3.00E-03                          | 1385                     | 3     | -554           | 0.00E+00                          | multiple                 | N/A             | N/A               |
| DQ571335          | 1344                     | 448   | -3             | 2.00E-104                         | 1250                     | 423         | -2.96          | 1.24E-95                          | 852                      | 532   | -1.6           | 5.60E-18                          | unique                   | intragenic      | SNORD6            |
| DQ571500          | 976                      | 338   | -2.89          | 2.14E-72                          | 770                      | 436         | -1.77          | 3.18E-22                          | 607                      | 282   | -2.15          | 4.47E-28                          | unique                   | intragenic      | SNORD51 in EEF1   |
| DQ593744          | 581                      | 273   | -2.13          | 1.92E-26                          | 436                      | 259         | -1.69          | 1.07E-11                          | 394                      | 78    | -5.08          | 6.24E-52                          | unique                   | intragenic      | SNORD58A in RPL17 |
| DQ598650          | 500                      | 101   | -4.95          | 1.45E-64                          | 407                      | 129         | -3.16          | 6.37E-35                          | 359                      | 106   | -3.4           | 4.43E-33                          | unique                   | intragenic      | SNORD83B in RPL3  |
| DQ595536          | 404                      | 57    | -7.08          | 1.38E-65                          | 355                      | 66          | -5.37          | 5.30E-49                          | 311                      | 34    | -9.27          | 5.77E-57                          | multiple                 | N/A             | N/A               |
| DQ593356          | 338                      | 55    | -6.17          | 7.38E-51                          | 320                      | 194         | -1.65          | 2.35E-08                          | 282                      | 64    | -4.41          | 8.01E-34                          | multiple                 | N/A             | N/A               |
| DQ598651          | 189                      | 2     | -94.25         | 2.16E-53                          | 212                      | 2           | -141.33        | 8.12E-61                          | 190                      | 10    | -19            | 2.74E-44                          | unique                   | intragenic      | SNORD107          |
| DQ570812          | 56                       | 11    | -5.09          | 0.00E+00                          | 61                       | 34          | -1.79          | 6.00E-03                          | 52                       | 3     | -20.7          | 1.64E-13                          | multiple                 | N/A             | N/A               |
| DQ594740          | 56                       | 18    | -3.15          | 1.11E-05                          | 61                       | 24          | -2.53          | 5.07E-05                          | 52                       | 22    | -2.35          | 1.00E-03                          | unique                   | intergenic      | N/A               |
| DQ593752          | 44                       | 25    | -1.77          | 2.90E-02                          | 52                       | 26          | -2.04          | 3.00E-03                          | 43                       | 17    | -2.58          | 0.00E+00                          | unique                   | intragenic      | SNORA31 in TPT1   |
| DQ571955          | 34                       | 2     | -16.75         | 1.94E-08                          | 40                       | 18          | -2.22          | 4.00E-03                          | 32                       | 3     | -12.6          | 6.92E-08                          | unique                   | intragenic      | SRSF1             |
| DQ578783          | 22                       | 2     | -10.88         | 3.59E-05                          | 26                       | 4           | -7.29          | 3.39E-05                          | 22                       | 3     | -8.7           | 3.59E-05                          | unique                   | intergenic      | N/A               |
| DQ570940          | 20                       | 2     | -9.75          | 0.00E+00                          | 25                       | 4           | -7.14          | 5.94E-05                          | 21                       | 10    | -2.1           | 7.10E-02                          | unique                   | intergenic      | N/A               |
| DQ587229          | 10                       | 2     | -4.75          | 3.90E-02                          | 12                       | 2           | -8             | 7.00E-03                          | 10                       | 3     | -4             | 3.90E-02                          | multiple                 | N/A             | N/A               |
| DQ572800          | 10                       | 2     | -4.75          | 3.90E-02                          | 12                       | 8           | -1.5           | 3.83E-01                          | 10                       | 3     | -4             | 3.90E-02                          | unique                   | intragenic      | RBM15B            |
| DQ597218          | 10                       | 2     | -4.75          | 3.90E-02                          | 12                       | 10          | -1.26          | 6.78E-01                          | 10                       | 3     | -4             | 3.90E-02                          | unique                   | intragenic      | ABCB10            |
| DQ598263          | 177                      | 311   | 1.75           | 1.32E-09                          | 194                      | 299         | 1.54           | 3.11E-06                          | 178                      | 359   | 2.02           | 4.08E-15                          | unique                   | intragenic      | PID1              |
| DQ598104          | 120                      | 268   | 2.23           | 2.86E-14                          | 129                      | 212         | 1.65           | 6.03E-06                          | 116                      | 539   | 4.64           | 3.05E-66                          | multiple                 | N/A             | N/A               |

|          |    |      |         |          |     |       |          |           |    |     |       |          |          |            |                  |
|----------|----|------|---------|----------|-----|-------|----------|-----------|----|-----|-------|----------|----------|------------|------------------|
| DQ570994 | 90 | 566  | 6.32    | 1.03E-85 | 100 | 667   | 6.67     | 1.22E-103 | 86 | 86  | 1     | 1.00E+00 | unique   | intragenic | ABCA2            |
| DQ572892 | 85 | 126  | 1.49    | 4.00E-03 | 95  | 221   | 2.32     | 1.40E-12  | 83 | 229 | 2.75  | 5.57E-17 | unique   | intragenic | SNORD71 in AP1G1 |
| DQ597997 | 51 | 103  | 2.01    | 3.35E-05 | 59  | 100   | 1.71     | 1.00E-03  | 49 | 178 | 3.66  | 5.61E-19 | multiple | N/A        | N/A              |
| DQ571003 | 44 | 157  | 3.54    | 4.22E-16 | 52  | 95    | 1.83     | 0.00E+00  | 43 | 94  | 2.21  | 1.12E-05 | multiple | N/A        | N/A              |
| DQ584698 | 27 | 38   | 1.43    | 1.36E-01 | 33  | 60    | 1.85     | 5.00E-03  | 27 | 49  | 1.81  | 1.17E-02 | unique   | intragenic | CPA6             |
| DQ571550 | 2  | 2    | 1.33    | 1.00E+00 | 2   | 12    | 7.67     | 1.30E-02  | 2  | 53  | 35    | 8.47E-14 | multiple | N/A        | N/A              |
| DQ590455 | 2  | 20   | 13      | 6.59E-05 | 2   | 12    | 7.67     | 1.30E-02  | 2  | 3   | 1.67  | 1.00E+00 | multiple | N/A        | N/A              |
| DQ596670 | 2  | 51   | 34      | 1.63E-13 | 2   | 4     | 2.33     | 6.87E-01  | 2  | 51  | 34    | 1.63E-13 | unique   | intragenic | SNORD89          |
| DQ597945 | 2  | 2233 | 1488.33 | 0.00E+00 | 2   | 23516 | 15677.33 | 0.00E+00  | 2  | 21  | 14.17 | 3.58E-05 | multiple | N/A        | N/A              |

N/A, not applicable.

**Supplementary Table S3H:** Summary of piRNAs differentially expressed in cancerous vs mammary epithelial MCF10A cells. Number of copies and nature of the transcription units where piRNAs mapping to unique genomic locations are encoded are indicated.

| Differential expression Comparison | Regulated | Multiple       |       | Unique         |       |             |             |      |        |                |
|------------------------------------|-----------|----------------|-------|----------------|-------|-------------|-------------|------|--------|----------------|
|                                    |           | N.er of piRNAs | %     | N.er of piRNAs | %     | Inter genic | Intra genic | mRNA | snoRNA | snoRNA in mRNA |
| BC vs MCF10A cells                 | 30        | 13             | 43.3% | 17             | 56.7% | 3           | 14          | 6    | 3      | 5              |

**Supplementary Table S4A:** Genomic distribution of the genes encoding piRNAs expressed in exponentially growing (G) or growth arrested (A) *wt*, Ct- and Nt- ER $\beta$ + MCF-7 cells. Number of copies and nature of the transcription units where piRNAs mapping to unique genomic locations are encoded are indicated.

| Cell line        | piRNAs identified | Multiple copies |            |            | Single copy    |            |            |             |             |             |               |                       |
|------------------|-------------------|-----------------|------------|------------|----------------|------------|------------|-------------|-------------|-------------|---------------|-----------------------|
|                  |                   | N.er of piRNAs  | Read count | % of reads | N.er of piRNAs | Read count | % of reads | Inter genic | Intra genic | <i>mRNA</i> | <i>snoRNA</i> | <i>snoRNA in mRNA</i> |
| MCF-7_G          | 65                | 15              | 3084       | 15.3%      | 50             | 17113      | 84.7%      | 9           | 41          | 9           | 2             | 30                    |
| MCF-7_A          | 65                | 12              | 1750       | 7.9%       | 53             | 20476      | 92.1%      | 12          | 41          | 8           | 3             | 30                    |
| Ct-ER $\beta$ _G | 58                | 12              | 1875       | 13.7%      | 46             | 11877      | 86.3%      | 7           | 39          | 7           | 2             | 30                    |
| Ct-ER $\beta$ _A | 72                | 14              | 2959       | 14.8%      | 58             | 17083      | 85.2%      | 12          | 46          | 13          | 2             | 31                    |
| Nt-ER $\beta$ _G | 71                | 16              | 2482       | 12.2%      | 55             | 17875      | 87.8%      | 15          | 40          | 10          | 1             | 29                    |
| Nt-ER $\beta$ _A | 71                | 13              | 2472       | 12.4%      | 58             | 17503      | 87.6%      | 14          | 44          | 9           | 2             | 33                    |

**Supplementary Table S4B:** Number of raw (not normalized) reads that mapped to each identified piRNA in the libraries from exponentially growing (G) *wt* MCF-7 cells, measured in the three technical replicates. piRNAs are named in accordance to NCBI accession number.

| NCBI Accession | Raw read count |           |           |
|----------------|----------------|-----------|-----------|
|                | MCF-7_G_1      | MCF-7_G_2 | MCF-7_G_3 |
| DQ587153       | 3599           | 3838      | 3926      |
| DQ595186       | 2594           | 2799      | 2898      |
| DQ598677       | 2197           | 2161      | 2270      |
| DQ597484       | 1183           | 1158      | 1234      |
| DQ590013       | 1099           | 1167      | 1236      |
| DQ596805       | 1082           | 1095      | 1060      |
| DQ594556       | 754            | 806       | 808       |
| DQ593039       | 713            | 761       | 816       |
| DQ597945       | 681            | 717       | 753       |
| DQ593538       | 673            | 735       | 794       |
| DQ571526       | 658            | 709       | 745       |
| DQ597347       | 498            | 517       | 541       |
| DQ571524       | 417            | 440       | 469       |
| DQ598675       | 388            | 354       | 388       |
| DQ570687       | 317            | 381       | 360       |
| DQ590548       | 271            | 269       | 296       |
| DQ597482       | 263            | 314       | 312       |
| DQ595807       | 237            | 279       | 264       |
| DQ582264       | 218            | 198       | 237       |
| DQ570994       | 186            | 190       | 213       |
| DQ592931       | 159            | 144       | 167       |
| DQ569993       | 156            | 213       | 236       |
| DQ571335       | 131            | 135       | 152       |
| DQ593767       | 113            | 107       | 134       |
| DQ571500       | 94             | 82        | 93        |
| DQ598263       | 66             | 83        | 70        |
| DQ596993       | 64             | 73        | 78        |
| DQ593744       | 56             | 74        | 80        |
| DQ598104       | 48             | 66        | 76        |
| DQ598428       | 37             | 38        | 45        |
| DQ587269       | 33             | 37        | 27        |
| DQ598646       | 29             | 18        | 16        |
| DQ571003       | 29             | 20        | 27        |

|          |    |    |    |
|----------|----|----|----|
| DQ593574 | 28 | 39 | 37 |
| DQ582566 | 28 | 20 | 27 |
| DQ572892 | 25 | 26 | 27 |
| DQ571858 | 21 | 17 | 34 |
| DQ597997 | 17 | 19 | 21 |
| DQ571419 | 16 | 11 | 23 |
| DQ595536 | 15 | 11 | 10 |
| DQ571591 | 14 | 10 | 14 |
| DQ570698 | 14 | 14 | 11 |
| DQ588040 | 13 | 16 | 20 |
| DQ593356 | 11 | 11 | 13 |
| DQ598650 | 9  | 15 | 23 |
| DQ596932 | 9  | 9  | 8  |
| DQ601526 | 9  | 7  | 5  |
| DQ571511 | 8  | 10 | 16 |
| DQ597397 | 8  | 1  | 1  |
| DQ570540 | 7  | 4  | 4  |
| DQ597975 | 5  | 8  | 11 |
| DQ596992 | 5  | 4  | 6  |
| DQ571589 | 4  | 1  | 1  |
| DQ570728 | 4  | 1  | 1  |
| DQ584197 | 4  | 6  | 4  |
| DQ595023 | 4  | 1  | 1  |
| DQ575884 | 4  | 4  | 1  |
| DQ600174 | 4  | 1  | 1  |
| DQ593752 | 4  | 1  | 4  |
| DQ592932 | 4  | 6  | 1  |
| DQ593407 | 1  | 4  | 1  |
| DQ584698 | 1  | 4  | 1  |
| DQ590455 | 1  | 4  | 1  |
| DQ596670 | 1  | 14 | 4  |
| DQ593636 | 1  | 1  | 6  |

**Supplementary Table S4C:** Number of raw (not normalized) reads that mapped to each identified piRNA in the libraries from growth-arrested (A) *wt* MCF-7 cells, measured in the three technical replicates. piRNAs are named in accordance to NCBI accession number.

| NCBI<br>Accession | Raw read count |           |           |
|-------------------|----------------|-----------|-----------|
|                   | MCF-7_A_1      | MCF-7_A_2 | MCF-7_A_3 |
| DQ598677          | 6181           | 5989      | 5994      |
| DQ587153          | 5285           | 5739      | 5824      |
| DQ595186          | 2599           | 2758      | 2876      |
| DQ597484          | 880            | 922       | 878       |
| DQ597347          | 860            | 852       | 883       |
| DQ593538          | 716            | 771       | 793       |
| DQ595807          | 708            | 688       | 717       |
| DQ594556          | 703            | 752       | 772       |
| DQ593039          | 571            | 516       | 566       |
| DQ571335          | 357            | 367       | 370       |
| DQ597945          | 297            | 299       | 357       |
| DQ590548          | 295            | 288       | 290       |
| DQ569993          | 291            | 324       | 294       |
| DQ570687          | 208            | 221       | 231       |
| DQ570994          | 202            | 202       | 202       |
| DQ571500          | 170            | 160       | 153       |
| DQ571526          | 170            | 166       | 171       |
| DQ582264          | 144            | 145       | 143       |
| DQ596993          | 105            | 92        | 143       |
| DQ592931          | 90             | 96        | 98        |
| DQ598104          | 85             | 79        | 81        |
| DQ598263          | 85             | 96        | 98        |
| DQ593767          | 69             | 50        | 72        |
| DQ597975          | 57             | 56        | 66        |
| DQ587269          | 54             | 47        | 60        |
| DQ593744          | 54             | 44        | 58        |
| DQ598428          | 52             | 55        | 63        |
| DQ572892          | 47             | 61        | 41        |
| DQ593574          | 42             | 54        | 67        |
| DQ596992          | 34             | 50        | 46        |
| DQ582566          | 32             | 45        | 33        |
| DQ571511          | 26             | 34        | 22        |
| DQ598646          | 22             | 24        | 24        |
| DQ588040          | 21             | 19        | 25        |

|          |    |    |    |
|----------|----|----|----|
| DQ590013 | 21 | 28 | 36 |
| DQ571419 | 21 | 28 | 26 |
| DQ596805 | 18 | 23 | 23 |
| DQ571858 | 16 | 19 | 32 |
| DQ575660 | 16 | 12 | 20 |
| DQ571591 | 16 | 13 | 8  |
| DQ598650 | 16 | 30 | 32 |
| DQ596932 | 13 | 4  | 10 |
| DQ593356 | 11 | 11 | 11 |
| DQ570540 | 10 | 5  | 9  |
| DQ571003 | 9  | 5  | 8  |
| DQ570698 | 8  | 8  | 18 |
| DQ571589 | 6  | 1  | 1  |
| DQ593407 | 6  | 1  | 1  |
| DQ570728 | 5  | 8  | 4  |
| DQ598008 | 4  | 1  | 1  |
| DQ597397 | 4  | 4  | 1  |
| DQ595536 | 4  | 10 | 6  |
| DQ597997 | 4  | 1  | 4  |
| DQ584197 | 4  | 10 | 8  |
| DQ597482 | 4  | 5  | 1  |
| DQ594740 | 4  | 5  | 4  |
| DQ596587 | 4  | 5  | 6  |
| DQ595023 | 1  | 10 | 4  |
| DQ584698 | 1  | 4  | 1  |
| DQ598651 | 1  | 1  | 4  |
| DQ578783 | 1  | 4  | 1  |
| DQ570812 | 1  | 4  | 4  |
| DQ596670 | 1  | 1  | 4  |
| DQ597403 | 1  | 1  | 4  |
| DQ593636 | 1  | 1  | 4  |

**Supplementary Table S4D:** Number of raw (not normalized) reads that mapped to each identified piRNA in the libraries from exponentially growing (G) Ct- ER $\beta$ + cells, measured in the three technical replicates. piRNAs are named in accordance to NCBI accession number.

| NCBI Accession | Raw read count     |                    |                    |
|----------------|--------------------|--------------------|--------------------|
|                | Ct-ER $\beta$ _G_1 | Ct-ER $\beta$ _G_2 | Ct-ER $\beta$ _G_3 |
| DQ598677       | 2195               | 2070               | 2148               |
| DQ587153       | 3214               | 3351               | 3531               |
| DQ595186       | 2440               | 2547               | 2759               |
| DQ597945       | 870                | 959                | 981                |
| DQ597347       | 524                | 542                | 624                |
| DQ597484       | 657                | 736                | 796                |
| DQ593039       | 313                | 394                | 354                |
| DQ593538       | 387                | 424                | 480                |
| DQ595807       | 348                | 370                | 380                |
| DQ594556       | 657                | 649                | 738                |
| DQ571335       | 103                | 102                | 124                |
| DQ582264       | 99                 | 90                 | 93                 |
| DQ569993       | 139                | 162                | 174                |
| DQ571526       | 106                | 132                | 121                |
| DQ598263       | 22                 | 23                 | 22                 |
| DQ590548       | 175                | 195                | 194                |
| DQ570687       | 144                | 165                | 156                |
| DQ571500       | 78                 | 91                 | 78                 |
| DQ592931       | 99                 | 63                 | 121                |
| DQ597975       | 6                  | 4                  | 9                  |
| DQ570994       | 127                | 160                | 157                |
| DQ593767       | 42                 | 43                 | 44                 |
| DQ596993       | 54                 | 55                 | 52                 |
| DQ590013       | 10                 | 4                  | 1                  |
| DQ596992       | 5                  | 10                 | 9                  |
| DQ598104       | 27                 | 29                 | 41                 |
| DQ582566       | 13                 | 16                 | 13                 |
| DQ587269       | 41                 | 30                 | 44                 |
| DQ593356       | 11                 | 22                 | 16                 |
| DQ593574       | 27                 | 30                 | 37                 |
| DQ598650       | 25                 | 12                 | 12                 |
| DQ598428       | 43                 | 37                 | 46                 |
| DQ572892       | 15                 | 10                 | 16                 |
| DQ598646       | 8                  | 8                  | 16                 |



|          |    |    |    |
|----------|----|----|----|
| DQ571858 | 1  | 11 | 9  |
| DQ593744 | 26 | 38 | 43 |
| DQ571511 | 13 | 9  | 15 |
| DQ588040 | 5  | 17 | 11 |
| DQ571419 | 5  | 12 | 6  |
| DQ595536 | 12 | 10 | 17 |
| DQ584197 | 5  | 12 | 17 |
| DQ597482 | 1  | 4  | 4  |
| DQ571591 | 7  | 12 | 8  |
| DQ571589 | 6  | 1  | 1  |
| DQ571003 | 4  | 10 | 12 |
| DQ570698 | 11 | 7  | 9  |
| DQ575660 | 1  | 4  | 5  |
| DQ571524 | 4  | 1  | 1  |
| DQ593407 | 4  | 4  | 4  |
| DQ596932 | 1  | 1  | 9  |
| DQ570999 | 1  | 1  | 4  |
| DQ597397 | 5  | 1  | 1  |
| DQ593752 | 4  | 1  | 1  |
| DQ592932 | 1  | 5  | 1  |
| DQ596670 | 1  | 1  | 4  |
| DQ596587 | 1  | 6  | 8  |
| DQ598130 | 1  | 1  | 4  |
| DQ596155 | 1  | 1  | 4  |

**Supplementary Table S4E:** Number of raw (not normalized) reads that mapped to each identified piRNA in the libraries from exponentially growing (G) Nt- ER $\beta$ + cells, measured in the three technical replicates. piRNAs are named in accordance to NCBI accession number.

| NCBI Accession | Raw read count     |                    |                    |
|----------------|--------------------|--------------------|--------------------|
|                | Nt-ER $\beta$ _G_1 | Nt-ER $\beta$ _G_2 | Nt-ER $\beta$ _G_3 |
| DQ598677       | 4224               | 4165               | 4384               |
| DQ587153       | 2348               | 2519               | 2671               |
| DQ595186       | 2526               | 2660               | 2844               |
| DQ597484       | 729                | 731                | 799                |
| DQ597347       | 775                | 762                | 788                |
| DQ593538       | 535                | 545                | 580                |
| DQ594556       | 806                | 829                | 843                |

|          |      |      |      |
|----------|------|------|------|
| DQ593039 | 3910 | 4003 | 4349 |
| DQ597945 | 908  | 996  | 997  |
| DQ595807 | 390  | 372  | 404  |
| DQ590548 | 437  | 462  | 475  |
| DQ569993 | 182  | 187  | 236  |
| DQ570687 | 134  | 144  | 131  |
| DQ571335 | 99   | 126  | 122  |
| DQ571526 | 148  | 140  | 162  |
| DQ597975 | 25   | 35   | 35   |
| DQ571500 | 70   | 78   | 84   |
| DQ592931 | 99   | 108  | 114  |
| DQ582264 | 96   | 86   | 84   |
| DQ570994 | 150  | 139  | 178  |
| DQ590013 | 5    | 8    | 4    |
| DQ598104 | 44   | 30   | 38   |
| DQ596992 | 50   | 55   | 63   |
| DQ598428 | 52   | 44   | 35   |
| DQ596993 | 35   | 31   | 37   |
| DQ598263 | 227  | 214  | 180  |
| DQ593574 | 28   | 32   | 33   |
| DQ593767 | 77   | 79   | 75   |
| DQ572892 | 16   | 30   | 14   |
| DQ587269 | 37   | 44   | 44   |
| DQ593744 | 31   | 26   | 28   |
| DQ582566 | 65   | 74   | 57   |
| DQ571858 | 7    | 11   | 16   |
| DQ598650 | 18   | 19   | 25   |
| DQ598646 | 16   | 23   | 14   |
| DQ593356 | 11   | 10   | 9    |
| DQ571419 | 17   | 13   | 12   |
| DQ588040 | 12   | 22   | 26   |
| DQ597997 | 37   | 45   | 37   |
| DQ571511 | 6    | 10   | 10   |
| DQ597397 | 5    | 1    | 1    |
| DQ594740 | 1    | 7    | 4    |
| DQ596932 | 1    | 5    | 7    |
| DQ571003 | 11   | 14   | 14   |
| DQ575660 | 4    | 1    | 6    |
| DQ595536 | 23   | 19   | 22   |
| DQ570698 | 7    | 10   | 12   |

|          |    |     |     |
|----------|----|-----|-----|
| DQ597403 | 4  | 1   | 1   |
| DQ570728 | 1  | 5   | 1   |
| DQ571591 | 7  | 6   | 1   |
| DQ584197 | 12 | 9   | 11  |
| DQ593407 | 1  | 4   | 7   |
| DQ600515 | 1  | 1   | 4   |
| DQ596587 | 4  | 1   | 1   |
| DQ571589 | 1  | 4   | 6   |
| DQ596538 | 1  | 8   | 1   |
| DQ571823 | 5  | 4   | 1   |
| DQ590404 | 35 | 35  | 47  |
| DQ597341 | 30 | 24  | 30  |
| DQ598167 | 1  | 10  | 7   |
| DQ575884 | 7  | 1   | 9   |
| DQ573352 | 4  | 1   | 8   |
| DQ570940 | 8  | 9   | 12  |
| DQ570540 | 4  | 4   | 9   |
| DQ598175 | 7  | 8   | 5   |
| DQ598252 | 1  | 4   | 1   |
| DQ597482 | 4  | 1   | 4   |
| DQ578783 | 90 | 111 | 100 |
| DQ593752 | 1  | 10  | 4   |
| DQ592932 | 1  | 7   | 1   |
| DQ598675 | 1  | 4   | 1   |

**Supplementary Table S4F:** Summary of piRNAs differentially expressed ( $\alpha < 0.05$  with Wilcoxon Mann-Whitney test) in exponentially growing (G) vs growth arrested (A) *wt* MCF-7 cells, or in ER $\beta^+$  vs ER $\beta^-$  MCF-7 cells. Number of copies and nature of the transcription units where piRNAs mapping to unique genomic locations are encoded are indicated.

| Pairwise comparisons             | piRNAs identified | Multiple copies |            | Single copy |            |            |            |      |        |                |
|----------------------------------|-------------------|-----------------|------------|-------------|------------|------------|------------|------|--------|----------------|
|                                  |                   | N. of piRNA     | % of reads | N. of piRNA | % of reads | Intergenic | Intragenic | mRNA | snoRNA | snoRNA in mRNA |
| G/A <i>wt</i> MCF-7 cells        | 39                | 8               | 20.5%      | 31          | 79.5%      | 7          | 24         | 7    | 1      | 16             |
| ER $\beta^+$ /ER $\beta^-$ cells | 25                | 8               | 32%        | 17          | 68%        | 4          | 13         | 4    | 0      | 9              |

**Supplementary Table S4G:** Summary of piRNAs differentially expressed ( $\alpha < 0.05$  with Wilcoxon Mann-Whitney test) in exponentially growing (G) vs growth arrested (A) MCF-7 cells. Information relative to number of copies and nature of the transcription units where piRNAs mapping to unique genomic locations are encoded are indicated.

| NCBI Accession | Normalized read count |           |           |                 |           |           | $\alpha$ Wilcoxon Mann-Whitney | Fold change | p-value Fisher's exact test | Copies in the genome | Genomic loci | Name     |
|----------------|-----------------------|-----------|-----------|-----------------|-----------|-----------|--------------------------------|-------------|-----------------------------|----------------------|--------------|----------|
|                | Exponentially growing |           |           | Growth arrested |           |           |                                |             |                             |                      |              |          |
|                | MCF-7_G_1             | MCF-7_G_2 | MCF-7_G_3 | MCF-7_A_1       | MCF-7_A_2 | MCF-7_A_3 |                                | MCF-7 G/A   |                             |                      |              |          |
| DQ601526       | 8                     | 6         | 4         | 0               | 0         | 0         | 0.0369                         | 6           | 3.81E-06                    | unique               | intragenic   | RBM33    |
| DQ598675       | 387                   | 337       | 354       | 0               | 0         | 0         | 0.0369                         | 359.33      | 0.00E+00                    | unique               | intragenic   | KIF5C    |
| DQ596805       | 1081                  | 1043      | 968       | 15              | 19        | 19        | 0.0463                         | 58.34       | 0.00E+00                    | unique               | intergenic   | N/A      |
| DQ571524       | 416                   | 419       | 428       | 0               | 0         | 0         | 0.0369                         | 421         | 0.00E+00                    | multiple             | N/A          | N/A      |
| DQ571003       | 28                    | 18        | 24        | 7               | 3         | 6         | 0.0495                         | 4.38        | 1.93E-09                    | multiple             | N/A          | N/A      |
| DQ590013       | 1098                  | 1112      | 1129      | 18              | 23        | 30        | 0.0495                         | 47.03       | 0.00E+00                    | unique               | intragenic   | KIAA0825 |
| DQ597482       | 262                   | 299       | 284       | 3               | 3         | 0         | 0.0463                         | 140.83      | 1.63E-243                   | multiple             | N/A          | N/A      |
| DQ597997       | 16                    | 17        | 18        | 3               | 0         | 3         | 0.0463                         | 8.5         | 3.13E-10                    | multiple             | N/A          | N/A      |
| DQ571526       | 657                   | 675       | 680       | 150             | 143       | 144       | 0.0495                         | 4.6         | 2.36E-245                   | multiple             | N/A          | N/A      |
| DQ597945       | 680                   | 683       | 687       | 263             | 258       | 302       | 0.0495                         | 2.49        | 1.42E-122                   | multiple             | N/A          | N/A      |

|          |      |      |      |      |      |      |        |       |           |          |            |                   |
|----------|------|------|------|------|------|------|--------|-------|-----------|----------|------------|-------------------|
| DQ592931 | 158  | 136  | 152  | 79   | 82   | 82   | 0.0463 | 1.84  | 5.83E-15  | unique   | intragenic | RNY4              |
| DQ593767 | 112  | 101  | 122  | 60   | 42   | 60   | 0.0463 | 2.07  | 4.19E-15  | unique   | intragenic | SNORD58B in RPL17 |
| DQ582264 | 217  | 188  | 216  | 127  | 125  | 120  | 0.0495 | 1.67  | 1.54E-15  | unique   | intergenic | N/A               |
| DQ597484 | 1182 | 1103 | 1127 | 782  | 798  | 743  | 0.0495 | 1.47  | 1.66E-49  | unique   | intergenic | N/A               |
| DQ570687 | 316  | 362  | 328  | 184  | 191  | 195  | 0.0495 | 1.76  | 9.41E-29  | unique   | intragenic | SNORD43 in RPL3   |
| DQ593039 | 712  | 725  | 745  | 507  | 446  | 479  | 0.0495 | 1.52  | 4.69E-37  | unique   | intergenic | N/A               |
| DQ594556 | 753  | 768  | 737  | 624  | 650  | 654  | 0.0495 | 1.17  | 2.02E-07  | unique   | intragenic | SNORD15A in RPS3  |
| DQ593356 | 10   | 10   | 11   | 9    | 9    | 8    | 0.0431 | 1.19  | 5.12E-01  | multiple | N/A        | N/A               |
| DQ595186 | 2593 | 2668 | 2647 | 2310 | 2388 | 2437 | 0.0495 | 1.11  | 1.40E-11  | unique   | intragenic | SNORD58C in RPL17 |
| DQ570994 | 185  | 180  | 194  | 179  | 174  | 170  | 0.0495 | 1.07  | 2.72E-01  | unique   | intragenic | ABCA2             |
| DQ593744 | 55   | 70   | 72   | 47   | 37   | 48   | 0.0495 | 1.49  | 3.26E-04  | unique   | intragenic | SNORD58A in RPL17 |
| DQ593538 | 672  | 700  | 725  | 636  | 667  | 671  | 0.0495 | 1.06  | 4.97E-02  | unique   | intragenic | SNORD17 in SNX5   |
| DQ587153 | 3598 | 3659 | 3587 | 4699 | 4969 | 4936 | 0.0495 | -1.35 | 2.78E-157 | unique   | intragenic | SNORD57 in NOP56  |
| DQ587269 | 32   | 34   | 24   | 47   | 40   | 50   | 0.0495 | -1.52 | 2.17E-03  | unique   | intragenic | SNORD20 in NCL    |
| DQ598428 | 36   | 35   | 40   | 45   | 47   | 53   | 0.0495 | -1.31 | 3.87E-02  | unique   | intragenic | SNORD1B in SNHG16 |
| DQ571500 | 93   | 77   | 84   | 150  | 138  | 129  | 0.0495 | -1.64 | 2.93E-10  | unique   | intragenic | SNORD51 in EEF1B2 |
| DQ597347 | 497  | 492  | 493  | 764  | 737  | 748  | 0.0495 | -1.52 | 1.83E-37  | multiple | N/A        | N/A               |
| DQ596993 | 63   | 69   | 70   | 92   | 79   | 120  | 0.0495 | -1.44 | 6.84E-05  | unique   | intragenic | SNORD110 in NOP56 |
| DQ572892 | 24   | 24   | 24   | 41   | 52   | 34   | 0.0369 | -1.76 | 1.16E-04  | unique   | intragenic | SNORD71 in AP1G1  |
| DQ569993 | 155  | 202  | 215  | 258  | 280  | 248  | 0.0495 | -1.37 | 5.68E-09  | unique   | intragenic | SNORD98 in CCAR1  |
| DQ598677 | 2196 | 2060 | 2074 | 5495 | 5186 | 5080 | 0.0495 | -2.49 | 0.00E+00  | unique   | intergenic | N/A               |
| DQ571335 | 130  | 128  | 138  | 317  | 317  | 313  | 0.0463 | -2.39 | 5.86E-53  | unique   | intragenic | SNORD6            |
| DQ595807 | 236  | 265  | 240  | 629  | 595  | 607  | 0.0495 | -2.47 | 8.59E-108 | unique   | intragenic | SNORD1B in SNHG16 |
| DQ571511 | 7    | 9    | 14   | 22   | 29   | 18   | 0.0495 | -2.3  | 1.10E-04  | unique   | intragenic | SNORD49A in C17   |
| DQ596992 | 4    | 3    | 5    | 29   | 42   | 38   | 0.0495 | -9.08 | 9.48E-21  | unique   | intragenic | EFCAB11           |
| DQ597975 | 4    | 7    | 9    | 50   | 48   | 55   | 0.0495 | -7.65 | 1.34E-26  | unique   | intergenic | N/A               |
| DQ575660 | 0    | 0    | 0    | 13   | 10   | 16   | 0.0369 | -13   | 3.61E-12  | unique   | intragenic | PLCH1             |
| DQ594740 | 0    | 0    | 0    | 3    | 3    | 3    | 0.0253 | -3    | 3.91E-03  | unique   | intergenic | N/A               |
| DQ596587 | 0    | 0    | 0    | 3    | 3    | 4    | 0.0339 | -3.33 | 1.95E-03  | unique   | intragenic | SNORA54 in RPS3   |

N/A, not applicable.

**Supplementary Table S4H:** Summary of piRNAs differentially expressed ( $\alpha < 0.05$  with Wilcoxon Mann-Whitney test) in Ct- and Nt- ER $\beta$ + vs wt (ER $\beta$ -) MCF-7 cells. Information relative to number of copies and nature of the transcription units where piRNAs mapping to unique genomic locations are encoded are indicated.

| NCBI<br>Accession | Normalized read count |      |      |               |      |      |               |      |      | $\alpha$<br>Wilcoxon<br>Mann-<br>Whitney | Fold change<br>ER $\beta$ -/ER $\beta$ + | p-value<br>Fisher's<br>exact test | Copies in the<br>genome | Genomic<br>loci | Name              |
|-------------------|-----------------------|------|------|---------------|------|------|---------------|------|------|------------------------------------------|------------------------------------------|-----------------------------------|-------------------------|-----------------|-------------------|
|                   | wt MCF-7              |      |      | Ct-ER $\beta$ |      |      | Nt-ER $\beta$ |      |      |                                          |                                          |                                   |                         |                 |                   |
|                   | G_1                   | G_2  | G_3  | G_1           | G_2  | G_3  | G_1           | G_2  | G_3  |                                          |                                          |                                   |                         |                 |                   |
| DQ601526          | 5                     | 4    | 2    | 0             | 0    | 0    | 0             | 0    | 0    | 0.006                                    | 3.67                                     | 5.63E-06                          | multiple                | N/A             | N/A               |
| DQ598675          | 263                   | 229  | 240  | 0             | 0    | 0    | 0             | 2    | 0    | 0.011                                    | 732                                      | 0.00E+00                          | unique                  | intragenic      | KIF5C             |
| DQ596805          | 734                   | 708  | 657  | 0             | 0    | 0    | 0             | 0    | 0    | 0.006                                    | 700                                      | 0.00E+00                          | unique                  | intergenic      | N/A               |
| DQ571524          | 282                   | 284  | 290  | 3             | 0    | 0    | 0             | 0    | 0    | 0.011                                    | 570.67                                   | 0.00E+00                          | multiple                | N/A             | N/A               |
| DQ590013          | 745                   | 755  | 766  | 9             | 3    | 0    | 3             | 5    | 2    | 0.02                                     | 206                                      | 0.00E+00                          | unique                  | intragenic      | KIAA0825          |
| DQ597482          | 178                   | 203  | 193  | 0             | 3    | 3    | 2             | 0    | 2    | 0.019                                    | 114.8                                    | 1.59E-256                         | multiple                | N/A             | N/A               |
| DQ571526          | 446                   | 458  | 462  | 105           | 126  | 108  | 98            | 90   | 99   | 0.02                                     | 4.36                                     | 5.65E-230                         | unique                  | intragenic      | RBM33             |
| DQ571003          | 19                    | 12   | 16   | 3             | 9    | 10   | 7             | 8    | 8    | 0.02                                     | 2.09                                     | 5.26E-04                          | multiple                | N/A             | N/A               |
| DQ571858          | 14                    | 10   | 20   | 0             | 10   | 7    | 4             | 6    | 9    | 0.028                                    | 2.44                                     | 7.25E-05                          | unique                  | intragenic      | SNORD4A in RPL23A |
| DQ582264          | 147                   | 128  | 146  | 98            | 85   | 83   | 63            | 55   | 51   | 0.02                                     | 1.94                                     | 8.92E-22                          | unique                  | intergenic      | N/A               |
| DQ570687          | 215                   | 246  | 223  | 143           | 157  | 140  | 89            | 93   | 80   | 0.02                                     | 1.95                                     | 4.30E-35                          | unique                  | intragenic      | SNORD43 in RPL3   |
| DQ593767          | 76                    | 69   | 83   | 41            | 40   | 39   | 51            | 51   | 45   | 0.02                                     | 1.71                                     | 4.52E-09                          | unique                  | Intragenic      | SNORD58B in RPL17 |
| DQ597484          | 802                   | 749  | 765  | 656           | 705  | 716  | 486           | 474  | 490  | 0.02                                     | 1.31                                     | 4.20E-25                          | unique                  | intergenic      | N/A               |
| DQ593744          | 37                    | 47   | 49   | 25            | 35   | 38   | 20            | 16   | 17   | 0.039                                    | 1.76                                     | 2.68E-06                          | unique                  | intragenic      | SNORD58A in RPL17 |
| DQ593538          | 456                   | 475  | 492  | 386           | 406  | 432  | 357           | 353  | 356  | 0.02                                     | 1.24                                     | 8.20E-11                          | unique                  | intragenic      | SNORD17 in SNX5   |
| DQ598104          | 32                    | 42   | 47   | 26            | 27   | 36   | 29            | 19   | 23   | 0.039                                    | 1.51                                     | 7.54E-04                          | multiple                | N/A             | N/A               |
| DQ595536          | 10                    | 6    | 6    | 11            | 9    | 14   | 15            | 12   | 13   | 0.038                                    | -1.68                                    | 3.03E-02                          | multiple                | N/A             | N/A               |
| DQ594556          | 511                   | 521  | 501  | 656           | 621  | 664  | 538           | 537  | 517  | 0.039                                    | -1.15                                    | 1.99E-06                          | unique                  | intragenic      | SNORD15A in RPS3  |
| DQ587269          | 22                    | 23   | 16   | 40            | 28   | 39   | 24            | 28   | 26   | 0.02                                     | -1.52                                    | 4.37E-03                          | unique                  | Intragenic      | SNORD20 in NCL    |
| DQ597347          | 337                   | 334  | 335  | 523           | 519  | 561  | 517           | 494  | 483  | 0.02                                     | -1.54                                    | 9.62E-36                          | multiple                | N/A             | N/A               |
| DQ598677          | 1491                  | 1399 | 1408 | 2194          | 1984 | 1934 | 2821          | 2702 | 2692 | 0.02                                     | -1.67                                    | 1.43E-241                         | unique                  | intergenic      | N/A               |

|          |     |     |     |     |     |     |     |     |     |      |       |          |          |            |                   |
|----------|-----|-----|-----|-----|-----|-----|-----|-----|-----|------|-------|----------|----------|------------|-------------------|
| DQ597945 | 462 | 464 | 467 | 869 | 919 | 883 | 606 | 646 | 612 | 0.02 | -1.63 | 2.53E-64 | multiple | N/A        | N/A               |
| DQ595807 | 160 | 180 | 163 | 347 | 354 | 341 | 260 | 241 | 248 | 0.02 | -1.78 | 1.06E-33 | unique   | intragenic | SNORD1B in SNHG16 |
| DQ584197 | 2   | 3   | 2   | 4   | 11  | 14  | 7   | 5   | 6   | 0.02 | -3.36 | 1.23E-03 | unique   | intragenic | SNORD36C in RPL7A |
| DQ596992 | 3   | 2   | 3   | 4   | 9   | 7   | 33  | 35  | 38  | 0.02 | -7.88 | 4.37E-14 | unique   | intragenic | EFCAB11           |

N/A, not applicable.

**Supplementary Table S4I:** Summary of piRNAs differentially expressed ( $\alpha < 0.05$  with Wilcoxon Mann-Whitney test) in exponentially growing (G) vs growth arrested (A) ER $\beta$ <sup>+</sup> MCF-7 cells. Information relative to number of copies and nature of the transcription units where piRNAs mapping to unique genomic locations are encoded are indicated.

| NCBI Accession | Normalized read count |      |      |               |      |      |                 |      |      |               |      |      | $\alpha$ Wilcox on Mann-Whitney | Fold change | ER $\beta$ <sup>+</sup> G/A | p-value Fisher's exact test | Copy in the genome | Genomic loci      | Name |
|----------------|-----------------------|------|------|---------------|------|------|-----------------|------|------|---------------|------|------|---------------------------------|-------------|-----------------------------|-----------------------------|--------------------|-------------------|------|
|                | Exponentially growing |      |      |               |      |      | Growth arrested |      |      |               |      |      |                                 |             |                             |                             |                    |                   |      |
|                | Nt-ER $\beta$         |      |      | Ct-ER $\beta$ |      |      | Nt-ER $\beta$   |      |      | Ct-ER $\beta$ |      |      |                                 |             |                             |                             |                    |                   |      |
|                | G_1                   | G_2  | G_3  | G_1           | G_2  | G_3  | A_1             | A_2  | A_3  | A_1           | A_2  | A_3  |                                 |             |                             |                             |                    |                   |      |
| DQ595536       | 15                    | 12   | 13   | 11            | 9    | 14   | 4               | 5    | 9    | 7             | 8    | 8    | 0.005                           | 1.8         | 2.68E-03                    | multiple                    | N/A                | N/A               |      |
| DQ594556       | 538                   | 537  | 517  | 656           | 621  | 664  | 454             | 461  | 474  | 254           | 252  | 252  | 0.004                           | 1.65        | 6.30E-79                    | unique                      | intragenic         | SNORD15A in RPS3  |      |
| DQ595186       | 1686                  | 1726 | 1746 | 2439          | 2442 | 2485 | 876             | 929  | 877  | 988           | 1039 | 1020 | 0.004                           | 2.19        | 0.00E+00                    | unique                      | intragenic         | SNORD58C in RPL17 |      |
| DQ570994       | 100                   | 90   | 109  | 126           | 152  | 141  | 63              | 62   | 70   | 64            | 59   | 73   | 0.004                           | 1.84        | 4.34E-23                    | unique                      | intragenic         | ABCA2             |      |
| DQ598104       | 29                    | 19   | 23   | 26            | 27   | 36   | 44              | 38   | 46   | 34            | 34   | 34   | 0.016                           | -1.44       | 3.80E-04                    | multiple                    | N/A                | N/A               |      |
| DQ598677       | 2821                  | 2702 | 2692 | 2194          | 1984 | 1934 | 4467            | 4291 | 4205 | 4310          | 4031 | 3975 | 0.004                           | -1.76       | 0.00E+00                    | unique                      | intergenic         | N/A               |      |
| DQ597347       | 517                   | 494  | 483  | 523           | 519  | 561  | 753             | 739  | 758  | 697           | 729  | 722  | 0.004                           | -1.42       | 9.35E-54                    | multiple                    | N/A                | N/A               |      |
| DQ571526       | 98                    | 90   | 99   | 105           | 126  | 108  | 122             | 129  | 136  | 145           | 159  | 147  | 0.006                           | -1.34       | 2.48E-08                    | multiple                    | N/A                | N/A               |      |
| DQ569993       | 121                   | 121  | 144  | 138           | 154  | 156  | 177             | 176  | 208  | 161           | 166  | 140  | 0.016                           | -1.23       | 6.02E-06                    | unique                      | intragenic         | SNORD98 in CCAR1  |      |
| DQ598646       | 10                    | 14   | 8    | 7             | 7    | 14   | 16              | 27   | 27   | 18            | 12   | 14   | 0.015                           | -1.9        | 3.86E-05                    | unique                      | intragenic         | SNORD85 in PUM1   |      |
| DQ593574       | 18                    | 20   | 20   | 26            | 28   | 32   | 36              | 31   | 38   | 24            | 28   | 35   | 0.045                           | -1.33       | 8.76E-03                    | unique                      | intragenic         | SNORD91A in TSR1  |      |
| DQ582264       | 63                    | 55   | 51   | 98            | 85   | 83   | 74              | 92   | 88   | 166           | 156  | 189  | 0.037                           | -1.76       | 6.58E-22                    | unique                      | intergenic         | N/A               |      |
| DQ571500       | 46                    | 50   | 51   | 77            | 86   | 69   | 80              | 81   | 85   | 79            | 95   | 96   | 0.025                           | -1.36       | 4.25E-06                    | unique                      | intragenic         | SNORD51 in EEF1B2 |      |

|          |    |    |    |     |    |     |     |     |     |     |     |     |       |        |           |        |            |                   |
|----------|----|----|----|-----|----|-----|-----|-----|-----|-----|-----|-----|-------|--------|-----------|--------|------------|-------------------|
| DQ571335 | 65 | 81 | 74 | 102 | 97 | 111 | 136 | 140 | 129 | 180 | 183 | 201 | 0.004 | -1.83  | 1.82E-30  | unique | intragenic | SNORD6            |
| DQ572892 | 10 | 19 | 8  | 14  | 9  | 14  | 31  | 33  | 36  | 21  | 21  | 22  | 0.004 | -2.22  | 3.71E-09  | unique | intragenic | SNORD71 in AP1G1  |
| DQ571858 | 4  | 6  | 9  | 0   | 10 | 7   | 19  | 10  | 14  | 15  | 7   | 13  | 0.016 | -2.17  | 7.47E-05  | unique | intragenic | SNORD4A in RPL23A |
| DQ597975 | 16 | 22 | 21 | 5   | 3  | 7   | 88  | 134 | 104 | 71  | 72  | 78  | 0.004 | -7.39  | 1.15E-90  | unique | intergenic | N/A               |
| DQ590013 | 3  | 5  | 2  | 9   | 3  | 0   | 45  | 40  | 50  | 46  | 50  | 61  | 0.004 | -13.27 | 9.80E-62  | unique | intragenic | KIAA0825          |
| DQ594740 | 0  | 4  | 2  | 0   | 0  | 0   | 5   | 5   | 6   | 30  | 44  | 35  | 0.003 | -20.83 | 2.40E-30  | unique | intergenic | N/A               |
| DQ596805 | 0  | 0  | 0  | 0   | 0  | 0   | 134 | 136 | 144 | 54  | 50  | 62  | 0.002 | -96.67 | 8.42E-176 | unique | intergenic | N/A               |
| DQ593636 | 0  | 0  | 0  | 0   | 0  | 0   | 0   | 2   | 2   | 2   | 2   | 0   | 0.019 | -1.33  | 3.90E-03  | unique | intragenic | SNORD100 in RPS12 |

N/A, not applicable.



**Supplementary Table S4J:** Number of raw (not normalized) reads that mapped to each identified piRNA in the libraries from growth-arrested (A) Ct- ER $\beta$ <sup>+</sup> cells, measured in the three technical replicates. piRNAs are named in accordance to NCBI accession number.

| NCBI Accession | Raw read count     |                    |                    |
|----------------|--------------------|--------------------|--------------------|
|                | Ct-ER $\beta$ _A_1 | Ct-ER $\beta$ _A_2 | Ct-ER $\beta$ _A_3 |
| DQ598677       | 6390               | 6173               | 6285               |
| DQ587153       | 3467               | 3772               | 3880               |
| DQ595186       | 1465               | 1591               | 1614               |
| DQ597945       | 1235               | 1331               | 1350               |
| DQ597347       | 1034               | 1117               | 1142               |
| DQ597484       | 929                | 932                | 979                |
| DQ593039       | 682                | 702                | 717                |
| DQ593538       | 484                | 509                | 499                |
| DQ595807       | 464                | 496                | 510                |
| DQ594556       | 377                | 387                | 399                |
| DQ571335       | 268                | 281                | 319                |
| DQ582264       | 247                | 240                | 300                |
| DQ569993       | 239                | 255                | 223                |
| DQ571526       | 216                | 244                | 234                |
| DQ598263       | 166                | 159                | 192                |
| DQ590548       | 156                | 153                | 188                |
| DQ570687       | 143                | 129                | 129                |
| DQ571500       | 118                | 146                | 153                |
| DQ592931       | 109                | 137                | 133                |
| DQ597975       | 106                | 111                | 124                |
| DQ570994       | 96                 | 91                 | 116                |
| DQ593767       | 83                 | 86                 | 75                 |
| DQ596805       | 81                 | 77                 | 99                 |
| DQ596993       | 78                 | 80                 | 112                |
| DQ590013       | 69                 | 77                 | 98                 |
| DQ596992       | 57                 | 51                 | 49                 |
| DQ598104       | 52                 | 53                 | 54                 |
| DQ578783       | 48                 | 60                 | 70                 |
| DQ582566       | 47                 | 54                 | 56                 |
| DQ594740       | 45                 | 69                 | 56                 |
| DQ587269       | 43                 | 53                 | 41                 |
| DQ593356       | 39                 | 44                 | 47                 |
| DQ593574       | 37                 | 44                 | 56                 |
| DQ598650       | 37                 | 26                 | 40                 |

|          |    |    |    |
|----------|----|----|----|
| DQ598428 | 36 | 35 | 43 |
| DQ572892 | 32 | 33 | 36 |
| DQ598646 | 28 | 20 | 23 |
| DQ597997 | 26 | 31 | 41 |
| DQ571858 | 23 | 12 | 21 |
| DQ593744 | 23 | 43 | 32 |
| DQ571511 | 18 | 19 | 21 |
| DQ588040 | 17 | 29 | 23 |
| DQ571419 | 13 | 9  | 20 |
| DQ595536 | 12 | 13 | 13 |
| DQ590404 | 10 | 6  | 5  |
| DQ584197 | 10 | 12 | 12 |
| DQ597482 | 10 | 5  | 11 |
| DQ571591 | 10 | 15 | 13 |
| DQ571589 | 9  | 1  | 4  |
| DQ575884 | 9  | 1  | 4  |
| DQ571003 | 9  | 8  | 7  |
| DQ570698 | 9  | 4  | 14 |
| DQ571873 | 7  | 1  | 1  |
| DQ575660 | 6  | 4  | 7  |
| DQ571823 | 5  | 5  | 1  |
| DQ571524 | 5  | 7  | 1  |
| DQ570540 | 5  | 1  | 1  |
| DQ593407 | 5  | 7  | 6  |
| DQ570728 | 4  | 7  | 7  |
| DQ596932 | 4  | 4  | 6  |
| DQ598294 | 4  | 1  | 1  |
| DQ593636 | 4  | 4  | 1  |
| DQ584698 | 1  | 7  | 8  |
| DQ597397 | 1  | 10 | 8  |
| DQ598651 | 1  | 1  | 6  |
| DQ571388 | 1  | 1  | 4  |
| DQ570812 | 1  | 1  | 5  |
| DQ593752 | 1  | 7  | 4  |
| DQ593415 | 1  | 4  | 1  |
| DQ598675 | 1  | 1  | 8  |
| DQ595179 | 1  | 1  | 4  |
| DQ597403 | 1  | 8  | 1  |

**Supplementary Table S4K:** Number of raw (not normalized) reads that mapped to each identified piRNA in the libraries from growth-arrested (A) Nt- ER $\beta$ + cells, measured in the three technical replicates. piRNAs are named in accordance to NCBI accession number.

| NCBI Accession | Raw read count     |                    |                    |
|----------------|--------------------|--------------------|--------------------|
|                | Nt-ER $\beta$ _A_1 | Nt-ER $\beta$ _A_2 | Nt-ER $\beta$ _A_3 |
| DQ598677       | 6627               | 6450               | 6696               |
| DQ587153       | 3037               | 3210               | 3405               |
| DQ595186       | 1301               | 1397               | 1398               |
| DQ597484       | 1216               | 1207               | 1284               |
| DQ597347       | 1118               | 1111               | 1208               |
| DQ593538       | 812                | 835                | 902                |
| DQ594556       | 675                | 694                | 755                |
| DQ593039       | 638                | 637                | 678                |
| DQ597945       | 591                | 562                | 619                |
| DQ595807       | 513                | 526                | 562                |
| DQ590548       | 409                | 396                | 456                |
| DQ569993       | 264                | 266                | 332                |
| DQ570687       | 210                | 198                | 188                |
| DQ571335       | 203                | 211                | 206                |
| DQ596805       | 200                | 206                | 230                |
| DQ571526       | 182                | 195                | 217                |
| DQ597975       | 131                | 202                | 167                |
| DQ571500       | 119                | 123                | 136                |
| DQ592931       | 112                | 137                | 172                |
| DQ582264       | 111                | 140                | 141                |
| DQ570994       | 95                 | 94                 | 112                |
| DQ590013       | 68                 | 61                 | 81                 |
| DQ598104       | 67                 | 58                 | 74                 |
| DQ596992       | 62                 | 75                 | 65                 |
| DQ598428       | 62                 | 60                 | 66                 |
| DQ596993       | 57                 | 52                 | 64                 |
| DQ598263       | 56                 | 71                 | 75                 |
| DQ593574       | 55                 | 48                 | 61                 |
| DQ593767       | 54                 | 47                 | 47                 |
| DQ572892       | 47                 | 50                 | 58                 |
| DQ587269       | 43                 | 57                 | 39                 |
| DQ593744       | 40                 | 40                 | 38                 |
| DQ582566       | 33                 | 35                 | 54                 |
| DQ571858       | 29                 | 16                 | 24                 |

|          |    |    |    |
|----------|----|----|----|
| DQ598650 | 29 | 21 | 18 |
| DQ598646 | 25 | 41 | 44 |
| DQ593356 | 17 | 15 | 29 |
| DQ571419 | 15 | 17 | 15 |
| DQ588040 | 14 | 24 | 23 |
| DQ597997 | 12 | 10 | 14 |
| DQ571511 | 12 | 20 | 19 |
| DQ597397 | 9  | 1  | 1  |
| DQ594740 | 9  | 9  | 11 |
| DQ596932 | 8  | 7  | 9  |
| DQ571003 | 8  | 15 | 7  |
| DQ575660 | 7  | 7  | 1  |
| DQ595536 | 7  | 9  | 15 |
| DQ570698 | 7  | 1  | 9  |
| DQ593415 | 7  | 1  | 12 |
| DQ597403 | 6  | 1  | 1  |
| DQ595023 | 5  | 5  | 1  |
| DQ570728 | 5  | 1  | 1  |
| DQ571524 | 5  | 1  | 4  |
| DQ571591 | 5  | 1  | 4  |
| DQ596670 | 5  | 1  | 1  |
| DQ584197 | 4  | 12 | 16 |
| DQ593407 | 4  | 5  | 7  |
| DQ600515 | 4  | 1  | 4  |
| DQ570992 | 4  | 1  | 1  |
| DQ596587 | 4  | 7  | 4  |
| DQ584698 | 1  | 4  | 1  |
| DQ571589 | 1  | 7  | 1  |
| DQ596538 | 1  | 1  | 4  |
| DQ575884 | 1  | 5  | 4  |
| DQ601526 | 1  | 5  | 1  |
| DQ600174 | 1  | 4  | 1  |
| DQ570540 | 1  | 4  | 1  |
| DQ578783 | 1  | 4  | 1  |
| DQ593752 | 1  | 1  | 4  |
| DQ593636 | 1  | 4  | 4  |
| DQ596155 | 1  | 1  | 6  |

**Supplementary Table S5A:** Normalized piRNA read count in small RNA sequencing libraries from paired normal and tumor breast tissue samples. N.er 40, 45, 53 and 79 corresponds to patients TAX577740, TAX577745, TAX577453, and TAX577579, respectively.

| NCBI<br>Accession | Normalized read count |       |       |       |        |       |       |       |
|-------------------|-----------------------|-------|-------|-------|--------|-------|-------|-------|
|                   | Normal                |       |       |       | Tumour |       |       |       |
|                   | 40N                   | 45N   | 53N   | 79N   | 40T    | 45T   | 53T   | 79T   |
| DQ597347          | 30579                 | 25755 | 11098 | 13936 | 12957  | 40164 | 17737 | 6661  |
| DQ598677          | 7304                  | 7148  | 5620  | 10268 | 11649  | 8685  | 13873 | 24226 |
| DQ596670          | 3796                  | 2782  | 8143  | 6838  | 1353   | 1307  | 1097  | 2596  |
| DQ597484          | 2566                  | 1566  | 1633  | 885   | 980    | 1342  | 3092  | 1962  |
| DQ598263          | 2367                  | 441   | 300   | 240   | 788    | 285   | 185   | 1112  |
| DQ598175          | 1924                  | 3504  | 1433  | 1066  | 2616   | 851   | 953   | 328   |
| DQ571003          | 1689                  | 323   | 263   | 244   | 240    | 461   | 262   | 834   |
| DQ592931          | 1685                  | 618   | 1043  | 2232  | 733    | 264   | 2641  | 4130  |
| DQ597975          | 1329                  | 2839  | 5731  | 5530  | 1593   | 617   | 8428  | 2962  |
| DQ571335          | 1007                  | 4460  | 1707  | 2402  | 8373   | 2065  | 564   | 399   |
| DQ575660          | 829                   | 513   | 400   | 1069  | 255    | 305   | 460   | 508   |
| DQ570940          | 597                   | 185   | 137   | 161   | 487    | 101   | 131   | 840   |
| DQ597403          | 577                   | 88    | 21    | 69    | 14     | 59    | 0     | 121   |
| DQ593039          | 523                   | 59    | 2586  | 318   | 878    | 101   | 397   | 2233  |
| DQ598183          | 475                   | 782   | 432   | 1396  | 271    | 180   | 163   | 136   |
| DQ582264          | 468                   | 444   | 237   | 161   | 261    | 635   | 325   | 727   |
| DQ598675          | 342                   | 378   | 785   | 255   | 3478   | 104   | 488   | 362   |
| DQ571419          | 326                   | 1342  | 427   | 565   | 1601   | 374   | 284   | 334   |
| DQ587153          | 322                   | 553   | 632   | 208   | 444    | 598   | 244   | 213   |
| DQ571526          | 321                   | 171   | 400   | 114   | 96     | 245   | 144   | 427   |
| DQ595807          | 321                   | 1901  | 4514  | 3005  | 1624   | 1108  | 2451  | 2577  |
| DQ570992          | 291                   | 99    | 0     | 49    | 26     | 116   | 14    | 14    |
| DQ580854          | 262                   | 4     | 0     | 0     | 12     | 5     | 0     | 24    |
| DQ598190          | 243                   | 26    | 100   | 76    | 0      | 59    | 0     | 107   |
| DQ598104          | 232                   | 1397  | 4045  | 3822  | 2695   | 589   | 4596  | 2387  |
| DQ594740          | 231                   | 70    | 84    | 197   | 189    | 28    | 14    | 119   |
| DQ578783          | 226                   | 68    | 0     | 52    | 194    | 44    | 45    | 158   |
| DQ571550          | 187                   | 53    | 16    | 25    | 27     | 13    | 0     | 12    |
| DQ590013          | 167                   | 37    | 174   | 269   | 242    | 143   | 27    | 545   |
| DQ596992          | 165                   | 0     | 0     | 7     | 24     | 5     | 90    | 57    |
| DQ569993          | 142                   | 497   | 1875  | 2532  | 2339   | 501   | 1151  | 1464  |
| DQ597341          | 139                   | 92    | 132   | 67    | 82     | 35    | 45    | 59    |
| DQ571823          | 114                   | 14    | 0     | 7     | 43     | 5     | 0     | 85    |

|          |     |     |      |      |      |     |     |      |
|----------|-----|-----|------|------|------|-----|-----|------|
| DQ584698 | 109 | 27  | 63   | 67   | 224  | 13  | 135 | 71   |
| DQ597397 | 102 | 32  | 0    | 13   | 10   | 19  | 0   | 12   |
| DQ597997 | 98  | 55  | 32   | 0    | 77   | 9   | 27  | 32   |
| DQ596309 | 98  | 481 | 406  | 724  | 428  | 30  | 86  | 292  |
| DQ598008 | 95  | 152 | 785  | 403  | 130  | 35  | 163 | 502  |
| DQ598252 | 93  | 59  | 358  | 76   | 6    | 51  | 0   | 16   |
| DQ593538 | 88  | 704 | 353  | 181  | 1129 | 146 | 230 | 148  |
| DQ593767 | 86  | 148 | 442  | 195  | 134  | 178 | 776 | 142  |
| DQ582566 | 84  | 135 | 1965 | 291  | 236  | 22  | 72  | 32   |
| DQ571524 | 77  | 0   | 0    | 0    | 0    | 8   | 0   | 14   |
| DQ595023 | 74  | 210 | 47   | 43   | 118  | 105 | 68  | 59   |
| DQ573323 | 73  | 250 | 300  | 231  | 194  | 116 | 14  | 14   |
| DQ598167 | 72  | 4   | 0    | 0    | 20   | 5   | 0   | 6    |
| DQ590404 | 72  | 9   | 0    | 0    | 0    | 5   | 0   | 8    |
| DQ571031 | 52  | 55  | 0    | 16   | 6    | 26  | 0   | 0    |
| DQ570728 | 44  | 323 | 1449 | 1479 | 829  | 175 | 673 | 1010 |
| DQ570968 | 43  | 0   | 0    | 0    | 10   | 0   | 0   | 12   |
| DQ593574 | 42  | 526 | 32   | 155  | 216  | 51  | 108 | 34   |
| DQ573352 | 40  | 0   | 0    | 0    | 0    | 6   | 0   | 6    |
| DQ593636 | 39  | 148 | 100  | 83   | 183  | 67  | 45  | 247  |
| DQ598445 | 38  | 0   | 0    | 0    | 0    | 3   | 0   | 18   |
| DQ598177 | 38  | 0   | 0    | 7    | 0    | 0   | 0   | 0    |
| DQ598646 | 38  | 358 | 590  | 356  | 536  | 89  | 126 | 164  |
| DQ596538 | 36  | 4   | 0    | 36   | 27   | 6   | 0   | 107  |
| DQ596183 | 36  | 0   | 0    | 0    | 0    | 0   | 0   | 0    |
| DQ571591 | 35  | 194 | 184  | 186  | 318  | 53  | 113 | 221  |
| DQ592953 | 35  | 11  | 16   | 22   | 31   | 21  | 0   | 51   |
| DQ598378 | 33  | 180 | 58   | 166  | 464  | 44  | 280 | 107  |
| DQ592932 | 33  | 14  | 42   | 60   | 86   | 14  | 208 | 500  |
| DQ571589 | 32  | 52  | 84   | 7    | 69   | 97  | 14  | 12   |
| DQ572892 | 31  | 267 | 232  | 195  | 371  | 51  | 59  | 117  |
| DQ587229 | 30  | 75  | 121  | 92   | 92   | 17  | 0   | 73   |
| DQ576872 | 30  | 95  | 105  | 76   | 84   | 23  | 176 | 69   |
| DQ584197 | 30  | 80  | 100  | 9    | 12   | 70  | 0   | 34   |
| DQ588040 | 26  | 33  | 0    | 13   | 12   | 36  | 0   | 0    |
| DQ593415 | 24  | 68  | 0    | 7    | 27   | 51  | 0   | 0    |
| DQ598650 | 24  | 86  | 32   | 0    | 61   | 140 | 23  | 0    |
| DQ595186 | 22  | 30  | 300  | 20   | 86   | 129 | 117 | 34   |
| DQ597218 | 20  | 7   | 0    | 0    | 0    | 6   | 14  | 0    |
| DQ596311 | 19  | 109 | 163  | 112  | 59   | 2   | 0   | 18   |

|          |    |     |     |    |    |    |     |    |
|----------|----|-----|-----|----|----|----|-----|----|
| DQ588594 | 17 | 0   | 0   | 0  | 0  | 2  | 0   | 0  |
| DQ570812 | 16 | 0   | 0   | 7  | 0  | 0  | 0   | 16 |
| DQ597887 | 15 | 0   | 0   | 0  | 0  | 28 | 0   | 30 |
| DQ596603 | 14 | 33  | 32  | 7  | 35 | 46 | 0   | 10 |
| DQ576604 | 14 | 0   | 0   | 0  | 0  | 59 | 14  | 0  |
| DQ596390 | 12 | 50  | 79  | 83 | 29 | 9  | 14  | 30 |
| DQ593752 | 11 | 46  | 163 | 13 | 33 | 70 | 41  | 36 |
| DQ593356 | 11 | 36  | 153 | 54 | 77 | 81 | 149 | 36 |
| DQ598619 | 10 | 4   | 0   | 0  | 0  | 0  | 0   | 0  |
| DQ571858 | 10 | 62  | 16  | 16 | 81 | 31 | 0   | 22 |
| DQ594465 | 9  | 0   | 16  | 0  | 0  | 4  | 0   | 0  |
| DQ596354 | 9  | 138 | 179 | 20 | 53 | 11 | 27  | 0  |
| DQ587514 | 8  | 4   | 274 | 0  | 6  | 21 | 14  | 0  |
| DQ571873 | 8  | 0   | 0   | 0  | 8  | 0  | 0   | 0  |
| DQ576200 | 8  | 17  | 0   | 0  | 0  | 2  | 0   | 0  |
| DQ571511 | 7  | 53  | 26  | 13 | 35 | 28 | 0   | 20 |
| DQ598428 | 7  | 39  | 0   | 9  | 14 | 36 | 14  | 12 |
| DQ597916 | 7  | 0   | 0   | 0  | 0  | 0  | 0   | 0  |
| DQ590835 | 7  | 0   | 0   | 0  | 0  | 0  | 0   | 0  |
| DQ571500 | 6  | 11  | 74  | 7  | 27 | 29 | 14  | 18 |
| DQ593744 | 6  | 52  | 147 | 0  | 31 | 69 | 77  | 12 |
| DQ600515 | 6  | 0   | 0   | 0  | 0  | 3  | 0   | 0  |
| DQ597960 | 5  | 19  | 0   | 20 | 26 | 58 | 27  | 34 |
| DQ596805 | 4  | 0   | 0   | 0  | 6  | 0  | 0   | 63 |
| DQ575884 | 4  | 0   | 0   | 0  | 0  | 8  | 0   | 0  |
| DQ571388 | 4  | 16  | 0   | 0  | 0  | 3  | 0   | 0  |
| DQ596830 | 3  | 0   | 0   | 0  | 0  | 0  | 0   | 0  |
| DQ587269 | 3  | 37  | 53  | 25 | 33 | 22 | 41  | 55 |
| DQ581533 | 3  | 0   | 0   | 0  | 0  | 0  | 0   | 0  |
| DQ596993 | 3  | 26  | 16  | 13 | 45 | 19 | 0   | 24 |
| DQ590830 | 3  | 7   | 16  | 20 | 0  | 9  | 0   | 16 |
| DQ570956 | 3  | 4   | 242 | 7  | 0  | 10 | 27  | 12 |
| DQ577008 | 3  | 0   | 0   | 0  | 0  | 0  | 0   | 0  |
| DQ593407 | 3  | 0   | 0   | 0  | 0  | 9  | 32  | 8  |
| DQ575656 | 3  | 11  | 74  | 20 | 6  | 5  | 0   | 36 |
| DQ576917 | 0  | 0   | 0   | 0  | 8  | 0  | 0   | 0  |
| DQ600514 | 0  | 0   | 16  | 0  | 0  | 0  | 0   | 0  |
| DQ573999 | 0  | 6   | 0   | 0  | 20 | 3  | 32  | 0  |
| DQ597945 | 0  | 0   | 0   | 0  | 0  | 0  | 14  | 0  |
| DQ573287 | 0  | 0   | 0   | 0  | 6  | 0  | 0   | 0  |

|          |   |     |     |     |     |    |    |     |
|----------|---|-----|-----|-----|-----|----|----|-----|
| DQ588101 | 0 | 0   | 0   | 7   | 0   | 6  | 0  | 0   |
| DQ570994 | 0 | 0   | 0   | 0   | 0   | 9  | 32 | 26  |
| DQ598651 | 0 | 14  | 0   | 11  | 8   | 6  | 0  | 0   |
| DQ596863 | 0 | 10  | 42  | 0   | 0   | 0  | 0  | 0   |
| DQ576918 | 0 | 0   | 105 | 49  | 65  | 0  | 0  | 233 |
| DQ594556 | 0 | 0   | 0   | 0   | 41  | 5  | 0  | 0   |
| DQ573706 | 0 | 0   | 0   | 0   | 0   | 0  | 63 | 0   |
| DQ570540 | 0 | 9   | 0   | 0   | 0   | 2  | 0  | 0   |
| DQ584649 | 0 | 0   | 0   | 0   | 12  | 0  | 0  | 0   |
| DQ590548 | 0 | 0   | 0   | 0   | 0   | 0  | 0  | 6   |
| DQ598300 | 0 | 0   | 0   | 7   | 0   | 0  | 0  | 0   |
| DQ593939 | 0 | 0   | 0   | 0   | 6   | 0  | 0  | 0   |
| DQ570698 | 0 | 4   | 0   | 0   | 0   | 2  | 0  | 0   |
| DQ577772 | 0 | 145 | 16  | 269 | 407 | 40 | 18 | 0   |
| DQ570687 | 0 | 10  | 0   | 0   | 0   | 10 | 0  | 6   |
| DQ588486 | 0 | 0   | 0   | 0   | 10  | 0  | 0  | 0   |
| DQ598130 | 0 | 0   | 0   | 0   | 0   | 2  | 0  | 0   |
| DQ570999 | 0 | 0   | 0   | 0   | 0   | 2  | 0  | 0   |
| DQ578832 | 0 | 0   | 0   | 0   | 6   | 0  | 0  | 6   |
| DQ583325 | 0 | 0   | 0   | 0   | 20  | 0  | 0  | 6   |
| DQ580405 | 0 | 0   | 0   | 0   | 0   | 2  | 0  | 0   |
| DQ582827 | 0 | 0   | 0   | 9   | 0   | 0  | 0  | 0   |
| DQ586711 | 0 | 0   | 0   | 0   | 0   | 0  | 14 | 0   |
| DQ600994 | 0 | 0   | 0   | 9   | 0   | 0  | 0  | 0   |
| DQ579145 | 0 | 0   | 0   | 0   | 0   | 0  | 14 | 0   |
| DQ598016 | 0 | 7   | 0   | 7   | 22  | 10 | 0  | 12  |
| DQ573293 | 0 | 0   | 0   | 0   | 18  | 0  | 0  | 389 |
| DQ596306 | 0 | 4   | 0   | 0   | 0   | 0  | 0  | 0   |
| DQ583332 | 0 | 0   | 0   | 0   | 12  | 0  | 0  | 6   |
| DQ596587 | 0 | 9   | 0   | 11  | 6   | 0  | 0  | 0   |
| DQ583674 | 0 | 13  | 0   | 0   | 0   | 8  | 0  | 0   |
| DQ594453 | 0 | 0   | 16  | 0   | 0   | 0  | 0  | 0   |
| DQ596155 | 0 | 11  | 16  | 0   | 39  | 3  | 0  | 8   |



**Supplementary Table S5B:** Summary of piRNAs differentially expressed ( $\alpha < 0.05$  with Wilcoxon Mann-Whitney test) in cancer vs normal mammary tissues from 4 breast cancer patients (TAX577740, TAX577745, TAX577453 and TAX577579). Information relative to number of copies and nature of the transcription units where piRNAs mapping to unique genomic locations are encoded are indicated.

| NCBI<br>Accession | Normalized read count |       |           |      |           |       |           |       | $\alpha$<br>Wilcoxon<br>Mann-<br>Whitney | Fold<br>change<br>T/N | p-value<br>Fisher's<br>exact test | Copies<br>in the<br>genome | Genomic loci       | Name       |
|-------------------|-----------------------|-------|-----------|------|-----------|-------|-----------|-------|------------------------------------------|-----------------------|-----------------------------------|----------------------------|--------------------|------------|
|                   | TAX577740             |       | TAX577745 |      | TAX577453 |       | TAX577579 |       |                                          |                       |                                   |                            |                    |            |
|                   | N                     | T     | N         | T    | N         | T     | N         | T     |                                          |                       |                                   |                            |                    |            |
| DQ596670          | 3796                  | 1353  | 2782      | 1307 | 8143      | 1097  | 6838      | 2596  | 0.021                                    | -3.39                 | 0.00E+00                          | unique                     | intragenic: snoRNA | SNORD89    |
| DQ598183          | 475                   | 271   | 782       | 180  | 432       | 163   | 1396      | 136   | 0.021                                    | -4.11                 | 0.00E+00                          | multiple                   | N/A                | N/A        |
| DQ597341          | 139                   | 82    | 92        | 35   | 132       | 45    | 67        | 59    | 0.043                                    | -1.95                 | 1.90E-16                          | unique                     | intergenic         | N/A        |
| DQ598252          | 93                    | 6     | 59        | 51   | 358       | 0     | 76        | 16    | 0.021                                    | -8.03                 | 1.58E-100                         | unique                     | intergenic         | N/A        |
| DQ596311          | 19                    | 59    | 109       | 2    | 163       | 0     | 112       | 18    | 0.043                                    | -5.10                 | 2.10E-53                          | unique                     | intragenic: snoRNA | SNORD113-8 |
| DQ598677          | 7304                  | 11649 | 7148      | 8685 | 5620      | 13873 | 10268     | 24226 | 0.043                                    | 1.93                  | 0.00E+00                          | unique                     | intergenic         | N/A        |
| DQ597960          | 5                     | 26    | 19        | 58   | 0         | 27    | 20        | 34    | 0.021                                    | 3.30                  | 5.55E-14                          | unique                     | intergenic         | N/A        |
| DQ570994          | 0                     | 0     | 0         | 9    | 0         | 32    | 0         | 26    | 0.047                                    | 16.75                 | 6.74E-21                          | unique                     | intragenic: mRNA   | ABCA2      |

N/A, not applicable.

**Supplementary Table S6A:** Identification of the putative targets of eight piRNAs differentially expressed in paired normal and tumor breast tissue samples from 4 breast cancer patients.

Stringent alignment score ( $\geq 170$ ) and energy threshold  $\leq -20.0$  kcal/mol were used to identify potential piRNA binding sites by sequence complementarity to all known human RNAs (RefSeq) or to the RNAs detected in breast cancer tissue samples.

| NCBI Accession | miRanda (RefSeq) |     |       | miRanda (expressed in breast ca) |     |       |
|----------------|------------------|-----|-------|----------------------------------|-----|-------|
|                | 5'UTR            | CDS | 3'UTR | 5'UTR                            | CDS | 3'UTR |
| DQ596670       | 42               | 78  | 221   | 3                                | 33  | 78    |
| DQ598183       | 35               | 201 | 203   | 9                                | 68  | 66    |
| DQ597341       | 95               | 541 | 114   | 30                               | 231 | 38    |
| DQ598252       | 11               | 45  | 6     | 3                                | 18  | 2     |
| DQ596311       | 92               | 458 | 476   | 14                               | 189 | 180   |
| DQ598677       | 60               | 346 | 146   | 9                                | 161 | 51    |
| DQ597960       | 24               | 195 | 168   | 3                                | 92  | 58    |
| DQ570994       | 41               | 80  | 148   | 11                               | 45  | 51    |

**Supplementary Table S6B:** Putative DQ596670 piRNA target RNAs expressed in breast tumours. piRNAs targeting long non coding RNAs are shown in *italic*.

| Gene symbol      | RefSeq n.er      | Expression (normalized read count) | Alignment score | Energy (kcal/mol) | DQ596670 binding in RNA | Transcript category |
|------------------|------------------|------------------------------------|-----------------|-------------------|-------------------------|---------------------|
| LOC653786        | NR_003676        | 3                                  | 178             | -26.84            | -                       | ncRNA (pseudogene)  |
| <i>LOC646471</i> | <i>NR_024498</i> | 24                                 | 173             | -28.39            | -                       | <i>lncRNA</i>       |
| ACACA            | NM_198839        | 3161                               | 173             | -24.26            | CDS                     | mRNA                |
| ACTA2            | NM_001613        | 16442                              | 173             | -22.37            | 3'UTR                   | mRNA                |
| ADAM2            | NM_001464        | 11                                 | 178             | -26.13            | CDS                     | mRNA                |
| ADORA3           | NM_000677        | 428                                | 179             | -26.43            | CDS                     | mRNA                |
| AMOTL1           | NM_130847        | 797                                | 172             | -27.25            | 3'UTR                   | mRNA                |
| ARFIP1           | NM_014447        | 1200                               | 172             | -21.29            | 3'UTR                   | mRNA                |
| ARHGAP9          | NM_032496        | 85                                 | 177             | -26.32            | 3'UTR                   | mRNA                |
| ARL1             | NM_001177        | 2805                               | 183             | -22.53            | 3'UTR                   | mRNA                |
| ATXN1L           | NM_001137675     | 772                                | 171             | -23.15            | 3'UTR                   | mRNA                |
| BCAM             | NM_001013257     | 4038                               | 170             | -22.81            | 3'UTR                   | mRNA                |
| BMP1             | NM_006129        | 1051                               | 174             | -26.30            | 3'UTR                   | mRNA                |
| BMPER            | NM_133468        | 1                                  | 178             | -25.48            | 3'UTR                   | mRNA                |
| BTBD9            | NM_152733        | 510                                | 177             | -23.62            | 3'UTR                   | mRNA                |

|          |              |      |     |        |       |      |
|----------|--------------|------|-----|--------|-------|------|
| C19orf12 | NM_031448    | 377  | 174 | -28.48 | 3'UTR | mRNA |
| C4orf33  | NM_173487    | 192  | 181 | -24.72 | 3'UTR | mRNA |
| CAND1    | NM_018448    | 4221 | 171 | -20.40 | CDS   | mRNA |
| CENPI    | NM_006733    | 94   | 170 | -20.53 | CDS   | mRNA |
| CHST8    | NM_022467    | 4    | 176 | -25.63 | 3'UTR | mRNA |
| CSNK1G1  | NM_022048    | 546  | 172 | -29.86 | 3'UTR | mRNA |
| DCUN1D5  | NM_032299    | 590  | 171 | -21.02 | 3'UTR | mRNA |
| DIO2     | NM_000793    | 1018 | 170 | -25.64 | 3'UTR | mRNA |
| DLC1     | NM_006094    | 640  | 172 | -24.09 | 3'UTR | mRNA |
| DOPEY2   | NM_005128    | 1377 | 172 | -24.74 | CDS   | mRNA |
| EIF4E2   | NM_001282958 | 1383 | 170 | -21.99 | 3'UTR | mRNA |
| EMD      | NM_000117    | 977  | 180 | -23.15 | 3'UTR | mRNA |
| ENOX2    | NM_006375    | 295  | 172 | -25.07 | 3'UTR | mRNA |
| EXD3     | NM_001286823 | 92   | 178 | -25.03 | 3'UTR | mRNA |
| EXOSC2   | NM_014285    | 595  | 173 | -23.42 | 3'UTR | mRNA |
| F2RL1    | NM_005242    | 137  | 173 | -22.86 | CDS   | mRNA |
| F5       | NM_000130    | 37   | 173 | -20.94 | 3'UTR | mRNA |
| FAM157A  | NM_001145248 | 3    | 176 | -22.60 | CDS   | mRNA |
| FAM157B  | NM_001145249 | 2    | 176 | -22.60 | CDS   | mRNA |
| FAM192A  | NM_024946    | 1803 | 172 | -20.14 | 5'UTR | mRNA |
| FAM19A1  | NM_213609    | 1    | 170 | -21.94 | 3'UTR | mRNA |
| FBXL7    | NM_001278317 | 827  | 177 | -28.15 | 3'UTR | mRNA |
| GABRE    | NM_004961    | 10   | 171 | -23.13 | 3'UTR | mRNA |
| GCH1     | NM_000161    | 357  | 170 | -23.40 | 3'UTR | mRNA |
| GPT2     | NM_133443    | 1398 | 170 | -21.28 | CDS   | mRNA |
| GRAMD1C  | NM_017577    | 142  | 171 | -20.18 | CDS   | mRNA |
| GRIK3    | NM_000831    | 15   | 171 | -28.03 | 3'UTR | mRNA |
| HERC3    | NM_014606    | 218  | 172 | -24.60 | 3'UTR | mRNA |
| HIF1A    | NM_001530    | 2633 | 183 | -23.08 | 3'UTR | mRNA |
| HIGD1A   | NM_014056    | 1200 | 179 | -20.94 | 3'UTR | mRNA |
| HSBP1    | NM_001537    | 1946 | 181 | -21.98 | 3'UTR | mRNA |
| IFIT2    | NM_001547    | 722  | 170 | -25.20 | CDS   | mRNA |
| IL21R    | NM_021798    | 178  | 173 | -24.31 | CDS   | mRNA |
| KBTBD11  | NM_014867    | 33   | 174 | -21.04 | 3'UTR | mRNA |
| KDM2B    | NM_032590    | 852  | 173 | -24.02 | 3'UTR | mRNA |
| LGALS8   | NM_006499    | 1384 | 174 | -29.02 | 3'UTR | mRNA |
| MAPKAP1  | NM_024117    | 1665 | 187 | -29.58 | 3'UTR | mRNA |
| MIA3     | NM_198551    | 4216 | 184 | -27.49 | CDS   | mRNA |
| NEK5     | NM_199289    | 50   | 171 | -23.33 | CDS   | mRNA |
| NFIA     | NM_005595    | 3127 | 172 | -23.58 | 3'UTR | mRNA |

|          |              |      |     |        |       |      |
|----------|--------------|------|-----|--------|-------|------|
| NSD1     | NM_022455    | 1322 | 172 | -21.29 | 3'UTR | mRNA |
| NUDT16L1 | NM_032349    | 899  | 177 | -25.69 | 3'UTR | mRNA |
| OPA1     | NM_130834    | 2057 | 170 | -24.03 | 5'UTR | mRNA |
| OXSR1    | NM_005109    | 2977 | 177 | -24.11 | 3'UTR | mRNA |
| PAPD5    | NM_001040284 | 446  | 172 | -20.96 | 3'UTR | mRNA |
| PCDH19   | NM_020766    | 86   | 173 | -23.34 | 3'UTR | mRNA |
| PCDHB9   | NM_019119    | 37   | 170 | -23.41 | 3'UTR | mRNA |
| PDHA1    | NM_000284    | 1446 | 174 | -25.10 | 3'UTR | mRNA |
| PGAP1    | NM_024989    | 74   | 174 | -26.64 | CDS   | mRNA |
| PIK3R3   | NM_003629    | 2246 | 175 | -21.38 | 3'UTR | mRNA |
| PLEKHA6  | NM_014935    | 2289 | 173 | -21.56 | 3'UTR | mRNA |
| PODXL    | NM_005397    | 2416 | 170 | -22.84 | CDS   | mRNA |
| PTBP2    | NM_021190    | 184  | 172 | -22.62 | 3'UTR | mRNA |
| PTCHD1   | NM_173495    | 2    | 177 | -21.12 | CDS   | mRNA |
| PXN      | NM_025157    | 3046 | 172 | -24.80 | 3'UTR | mRNA |
| RALGAPA1 | NM_014990    | 370  | 171 | -20.33 | CDS   | mRNA |
| RAPH1    | NM_213589    | 1349 | 170 | -24.60 | 3'UTR | mRNA |
| RBPJ     | NM_005349    | 770  | 173 | -21.14 | 3'UTR | mRNA |
| RIMS2    | NM_014677    | 3    | 181 | -23.16 | 3'UTR | mRNA |
| RNF144A  | NM_014746    | 634  | 172 | -30.05 | 3'UTR | mRNA |
| SAMD12   | NM_001101676 | 973  | 179 | -25.34 | 3'UTR | mRNA |
| SCAMP1   | NM_004866    | 1426 | 174 | -21.06 | CDS   | mRNA |
| SERF2    | NM_001018108 | 8766 | 172 | -22.76 | 3'UTR | mRNA |
| SFRP1    | NM_003012    | 126  | 171 | -30.20 | 3'UTR | mRNA |
| SH3TC2   | NM_024577    | 21   | 176 | -20.23 | 3'UTR | mRNA |
| SLC16A6  | NM_004694    | 30   | 181 | -30.91 | CDS   | mRNA |
| SLC19A2  | NM_006996    | 1089 | 172 | -23.16 | CDS   | mRNA |
| SLC22A15 | NM_018420    | 58   | 174 | -25.83 | CDS   | mRNA |
| SLC35F1  | NM_001029858 | 16   | 171 | -23.08 | 3'UTR | mRNA |
| SLC4A7   | NM_003615    | 1619 | 181 | -26.69 | CDS   | mRNA |
| SLCO3A1  | NM_013272    | 213  | 178 | -23.93 | 3'UTR | mRNA |
| SORBS1   | NM_024991    | 1669 | 170 | -22.76 | CDS   | mRNA |
| STRADA   | NM_153335    | 590  | 172 | -23.62 | 3'UTR | mRNA |
| SURF6    | NM_006753    | 889  | 171 | -24.63 | 3'UTR | mRNA |
| TBC1D15  | NM_022771    | 808  | 177 | -25.98 | 3'UTR | mRNA |
| THEMIS   | NM_001010923 | 13   | 172 | -22.81 | 3'UTR | mRNA |
| TLN2     | NM_015059    | 868  | 174 | -24.64 | CDS   | mRNA |
| TM2D2    | NM_031940    | 1612 | 178 | -21.99 | 3'UTR | mRNA |
| TMEM110  | NM_198563    | 280  | 173 | -20.87 | 3'UTR | mRNA |
| TMEM154  | NM_152680    | 226  | 170 | -22.72 | 3'UTR | mRNA |

|         |              |      |     |        |       |      |
|---------|--------------|------|-----|--------|-------|------|
| TOMM5   | NM_001001790 | 1483 | 172 | -28.82 | 3'UTR | mRNA |
| TRANK1  | NM_014831    | 1217 | 170 | -21.66 | 3'UTR | mRNA |
| TTBK2   | NM_173500    | 58   | 178 | -20.99 | 3'UTR | mRNA |
| TULP1   | NM_003322    | 1    | 170 | -26.27 | CDS   | mRNA |
| UBN1    | NM_001079514 | 2657 | 175 | -26.69 | CDS   | mRNA |
| UFM1    | NM_016617    | 1113 | 172 | -22.39 | 3'UTR | mRNA |
| VAPA    | NM_003574    | 2656 | 175 | -20.07 | 3'UTR | mRNA |
| VCAM1   | NM_001078    | 1852 | 173 | -24.07 | 3'UTR | mRNA |
| WEE1    | NM_003390    | 1106 | 174 | -25.16 | CDS   | mRNA |
| XRCC5   | NM_021141    | 9600 | 178 | -23.92 | 3'UTR | mRNA |
| ZBTB41  | NM_194314    | 1345 | 172 | -22.44 | 3'UTR | mRNA |
| ZDHHC21 | NM_178566    | 111  | 176 | -21.75 | 3'UTR | mRNA |
| ZEB2    | NM_014795    | 643  | 179 | -22.18 | 5'UTR | mRNA |
| ZHX3    | NM_015035    | 538  | 174 | -21.74 | 3'UTR | mRNA |
| ZNF140  | NM_003440    | 675  | 179 | -24.31 | CDS   | mRNA |
| ZNF273  | NM_021148    | 230  | 180 | -22.54 | 3'UTR | mRNA |
| ZNF460  | NM_006635    | 29   | 170 | -26.65 | CDS   | mRNA |
| ZNF502  | NM_033210    | 121  | 170 | -22.24 | CDS   | mRNA |
| ZNF527  | NM_032453    | 82   | 170 | -24.72 | 3'UTR | mRNA |
| ZNF763  | NM_001012753 | 31   | 170 | -21.19 | CDS   | mRNA |
| ZNF814  | NM_001144989 | 203  | 172 | -22.33 | 3'UTR | mRNA |

**Supplementary Table S6C:** Putative DQ598183 piRNA target RNAs expressed in breast tumours. piRNAs targeting long non coding RNAs are shown in *italic*.

| Gene symbol         | RefSeq n.er      | Expression (normalized read count) | Alignment score | Energy (kcal/mol) | DQ598183 binding in RNA | Transcript category |
|---------------------|------------------|------------------------------------|-----------------|-------------------|-------------------------|---------------------|
| GBAP1               | NR_002188        | 1872                               | 172             | -31.55            | -                       | ncRNA (pseudogene)  |
| LOC646214           | NR_027053        | 206                                | 174             | -26.87            | -                       | ncRNA (pseudogene)  |
| <i>LOC100129550</i> | <i>NR_024618</i> | <i>194</i>                         | <i>187</i>      | <i>-30.54</i>     | -                       | <i>lncRNA</i>       |
| <i>TSIX</i>         | <i>NR_003255</i> | <i>284</i>                         | <i>177</i>      | <i>-30.05</i>     | -                       | <i>lncRNA</i>       |
| AASDH               | NM_181806        | 347                                | 171             | -37.21            | CDS                     | mRNA                |
| ABL2                | NM_005158        | 1446                               | 171             | -27.42            | 3'UTR                   | mRNA                |
| ALDOC               | NM_005165        | 77                                 | 171             | -26.54            | CDS                     | mRNA                |

|          |              |      |     |        |       |      |
|----------|--------------|------|-----|--------|-------|------|
| AMHR2    | NM_020547    | 2    | 170 | -30.42 | CDS   | mRNA |
| AP3S2    | NM_005829    | 746  | 172 | -30.77 | 3'UTR | mRNA |
| ARCN1    | NM_001655    | 3992 | 179 | -23.49 | 3'UTR | mRNA |
| ARHGAP1  | NM_004308    | 4399 | 172 | -35.31 | 3'UTR | mRNA |
| ARHGAP20 | NM_020809    | 49   | 170 | -28.48 | 3'UTR | mRNA |
| ARID2    | NM_152641    | 923  | 177 | -25.63 | 3'UTR | mRNA |
| ATG4D    | NM_032885    | 208  | 173 | -31.79 | CDS   | mRNA |
| ATP1A4   | NM_144699    | 19   | 170 | -26.83 | CDS   | mRNA |
| AXIN2    | NM_004655    | 184  | 171 | -28.13 | CDS   | mRNA |
| BBS9     | NM_014451    | 181  | 177 | -30.36 | CDS   | mRNA |
| BSN      | NM_003458    | 5    | 175 | -22.95 | CDS   | mRNA |
| BTG2     | NM_006763    | 6493 | 171 | -33.84 | 3'UTR | mRNA |
| C1GALT1  | NM_020156    | 149  | 170 | -23.79 | 3'UTR | mRNA |
| CC2D1B   | NM_032449    | 1149 | 175 | -26.38 | 3'UTR | mRNA |
| CCL15    | NM_032965    | 2    | 171 | -28.62 | 5'UTR | mRNA |
| CCL18    | NM_002988    | 202  | 171 | -32.04 | CDS   | mRNA |
| CDC23    | NM_004661    | 560  | 173 | -28.93 | 3'UTR | mRNA |
| CHRD1    | NM_145234    | 29   | 174 | -21.96 | CDS   | mRNA |
| CLEC2D   | NM_013269    | 349  | 177 | -28.28 | 3'UTR | mRNA |
| CNKS2    | NM_014927    | 1    | 172 | -29.62 | CDS   | mRNA |
| CNOT4    | NM_001190850 | 442  | 170 | -33.37 | CDS   | mRNA |
| CPS1     | NM_001875    | 67   | 172 | -29.30 | CDS   | mRNA |
| CR1      | NM_000651    | 13   | 172 | -26.65 | CDS   | mRNA |
| CREBBP   | NM_004380    | 3194 | 174 | -30.10 | CDS   | mRNA |
| CRKL     | NM_005207    | 2619 | 179 | -27.49 | 3'UTR | mRNA |
| CXorf36  | NM_176819    | 379  | 178 | -41.35 | 3'UTR | mRNA |
| DARS2    | NM_018122    | 2089 | 171 | -26.49 | CDS   | mRNA |
| DAXX     | NM_001350    | 1609 | 171 | -30.38 | CDS   | mRNA |
| DCDC1    | NM_181807    | 11   | 173 | -24.80 | CDS   | mRNA |
| DDC      | NM_001242890 | 233  | 177 | -39.30 | 3'UTR | mRNA |
| DNAH10   | NM_207437    | 5    | 172 | -35.83 | CDS   | mRNA |
| DNAJB5   | NM_012266    | 170  | 178 | -37.10 | 3'UTR | mRNA |
| DTX3L    | NM_138287    | 2514 | 181 | -24.89 | 3'UTR | mRNA |
| DUSP8    | NM_004420    | 119  | 170 | -30.92 | 3'UTR | mRNA |
| EDA2R    | NM_021783    | 45   | 173 | -24.98 | 3'UTR | mRNA |
| EML4     | NM_019063    | 2007 | 173 | -31.33 | 3'UTR | mRNA |
| EMR2     | NM_013447    | 75   | 174 | -31.07 | 3'UTR | mRNA |
| FAM115C  | NM_173678    | 225  | 170 | -31.99 | 3'UTR | mRNA |
| FBXO44   | NM_001014765 | 185  | 170 | -38.75 | 5'UTR | mRNA |
| FKTN     | NM_006731    | 641  | 170 | -32.64 | 3'UTR | mRNA |

|          |              |       |     |        |       |      |
|----------|--------------|-------|-----|--------|-------|------|
| FLNA     | NM_001456    | 16130 | 176 | -33.31 | CDS   | mRNA |
| FMN2     | NM_020066    | 8     | 172 | -34.97 | CDS   | mRNA |
| FOXRED2  | NM_024955    | 1378  | 170 | -28.35 | 3'UTR | mRNA |
| FRAS1    | NM_025074    | 60    | 172 | -24.49 | 3'UTR | mRNA |
| GALNT6   | NM_007210    | 5873  | 170 | -33.15 | CDS   | mRNA |
| GBA      | NM_000157    | 6219  | 172 | -31.55 | CDS   | mRNA |
| GGCX     | NM_000821    | 1034  | 170 | -23.93 | 3'UTR | mRNA |
| GLCC11   | NM_138426    | 169   | 173 | -29.24 | 5'UTR | mRNA |
| GLS      | NM_014905    | 737   | 172 | -27.34 | 3'UTR | mRNA |
| H3F3B    | NM_005324    | 11219 | 171 | -25.74 | 3'UTR | mRNA |
| HDLBP    | NM_005336    | 19002 | 173 | -30.16 | CDS   | mRNA |
| HECTD3   | NM_024602    | 965   | 170 | -32.15 | CDS   | mRNA |
| HOMER1   | NM_004272    | 145   | 171 | -28.23 | 3'UTR | mRNA |
| IL22RA1  | NM_021258    | 7     | 179 | -39.02 | CDS   | mRNA |
| INTS8    | NM_017864    | 1461  | 170 | -30.18 | 5'UTR | mRNA |
| ISG20L2  | NM_030980    | 1855  | 171 | -25.53 | 3'UTR | mRNA |
| ITSN1    | NM_003024    | 1117  | 171 | -31.71 | CDS   | mRNA |
| KCNMA1   | NM_001271520 | 797   | 171 | -29.07 | 3'UTR | mRNA |
| KLRD1    | NM_007334    | 39    | 172 | -25.41 | 3'UTR | mRNA |
| KMO      | NM_003679    | 887   | 178 | -33.13 | CDS   | mRNA |
| LPPR4    | NM_014839    | 35    | 176 | -32.13 | CDS   | mRNA |
| LRRC3B   | NM_052953    | 2     | 172 | -30.71 | 3'UTR | mRNA |
| MAPK7    | NM_002749    | 521   | 175 | -40.33 | CDS   | mRNA |
| MAPKAPK3 | NM_004635    | 452   | 171 | -33.29 | CDS   | mRNA |
| MAPT     | NM_005910    | 183   | 182 | -30.39 | 3'UTR | mRNA |
| MED13    | NM_005121    | 1654  | 170 | -24.10 | CDS   | mRNA |
| METTL1   | NM_023033    | 774   | 170 | -33.78 | CDS   | mRNA |
| MFN1     | NM_033540    | 901   | 172 | -26.87 | 3'UTR | mRNA |
| MKL1     | NM_020831    | 1101  | 170 | -34.52 | 3'UTR | mRNA |
| MPI      | NM_002435    | 662   | 172 | -29.98 | CDS   | mRNA |
| MPI      | NM_002435    | 662   | 172 | -27.63 | 3'UTR | mRNA |
| MRAS     | NM_012219    | 507   | 170 | -29.50 | 3'UTR | mRNA |
| MRPS21   | NM_018997    | 2251  | 178 | -33.72 | 3'UTR | mRNA |
| MYBPC1   | NM_002465    | 52    | 179 | -29.54 | CDS   | mRNA |
| MYOCD    | NM_153604    | 2     | 184 | -40.00 | CDS   | mRNA |
| NCOA6    | NM_014071    | 1963  | 171 | -34.38 | CDS   | mRNA |
| NDFIP2   | NM_019080    | 592   | 170 | -32.46 | 5'UTR | mRNA |
| NID1     | NM_002508    | 4112  | 171 | -23.62 | CDS   | mRNA |
| NKD1     | NM_033119    | 57    | 174 | -34.89 | 3'UTR | mRNA |
| NOS3     | NM_000603    | 180   | 170 | -32.66 | CDS   | mRNA |

|         |              |      |     |        |       |      |
|---------|--------------|------|-----|--------|-------|------|
| OTUB2   | NM_023112    | 199  | 171 | -26.86 | 3'UTR | mRNA |
| PAK2    | NM_002577    | 5212 | 174 | -26.87 | 3'UTR | mRNA |
| PDIA6   | NM_001282707 | 8810 | 170 | -30.48 | 5'UTR | mRNA |
| PGR     | NM_000926    | 54   | 172 | -30.76 | 3'UTR | mRNA |
| PHKA1   | NM_002637    | 534  | 177 | -31.28 | CDS   | mRNA |
| PLK1    | NM_005030    | 1123 | 178 | -36.88 | CDS   | mRNA |
| PPAT    | NM_002703    | 595  | 173 | -31.12 | CDS   | mRNA |
| PRH2    | NM_005042    | 1    | 172 | -24.88 | 3'UTR | mRNA |
| PRKDC   | NM_006904    | 9539 | 181 | -41.98 | CDS   | mRNA |
| PSEN1   | NM_000021    | 2269 | 172 | -22.66 | CDS   | mRNA |
| PSMD1   | NM_002807    | 3467 | 177 | -30.80 | CDS   | mRNA |
| RAE1    | NM_003610    | 875  | 170 | -27.21 | CDS   | mRNA |
| RASSF8  | NM_001164748 | 255  | 173 | -29.50 | 3'UTR | mRNA |
| RAVER1  | NM_133452    | 1470 | 177 | -34.05 | 3'UTR | mRNA |
| REV3L   | NM_002912    | 276  | 170 | -31.98 | CDS   | mRNA |
| RNF111  | NM_017610    | 521  | 176 | -32.58 | 3'UTR | mRNA |
| RNPS1   | NM_001286627 | 4599 | 177 | -31.31 | CDS   | mRNA |
| RNPS1   | NM_080594    | 4599 | 177 | -31.31 | 3'UTR | mRNA |
| RRP12   | NM_015179    | 1581 | 170 | -31.06 | CDS   | mRNA |
| SCNN1B  | NM_000336    | 1    | 177 | -28.02 | CDS   | mRNA |
| SEC22A  | NM_012430    | 393  | 170 | -28.75 | 3'UTR | mRNA |
| SEL1L3  | NM_015187    | 283  | 170 | -29.36 | CDS   | mRNA |
| SHISA6  | NM_207386    | 3    | 172 | -28.43 | 3'UTR | mRNA |
| SIM2    | NM_005069    | 26   | 174 | -31.01 | 3'UTR | mRNA |
| SLC22A1 | NM_153187    | 2    | 171 | -45.37 | CDS   | mRNA |
| SLC27A1 | NM_198580    | 557  | 173 | -33.72 | 3'UTR | mRNA |
| SLC44A1 | NM_080546    | 3988 | 171 | -28.00 | 3'UTR | mRNA |
| SLC6A1  | NM_003042    | 42   | 179 | -29.81 | CDS   | mRNA |
| SLC6A8  | NM_005629    | 1570 | 185 | -34.96 | 3'UTR | mRNA |
| SLC9A2  | NM_003048    | 121  | 175 | -28.08 | 3'UTR | mRNA |
| SNX21   | NM_033421    | 317  | 171 | -30.92 | 3'UTR | mRNA |
| SORCS1  | NM_052918    | 55   | 176 | -29.52 | 3'UTR | mRNA |
| SPAG9   | NM_001251971 | 1637 | 171 | -28.00 | 5'UTR | mRNA |
| STAG2   | NM_006603    | 2160 | 172 | -27.51 | CDS   | mRNA |
| SYT11   | NM_152280    | 389  | 170 | -27.56 | 3'UTR | mRNA |
| TBL1XR1 | NM_024665    | 3681 | 175 | -34.49 | 5'UTR | mRNA |
| TENC1   | NM_198316    | 636  | 172 | -32.56 | CDS   | mRNA |
| TEX15   | NM_031271    | 4    | 171 | -24.77 | CDS   | mRNA |
| TFDP2   | NM_006286    | 611  | 171 | -32.03 | CDS   | mRNA |
| TNRC6A  | NM_014494    | 1313 | 171 | -23.71 | CDS   | mRNA |



|         |              |      |     |        |       |      |
|---------|--------------|------|-----|--------|-------|------|
| TRMT6   | NM_015939    | 569  | 176 | -29.84 | CDS   | mRNA |
| TTC21B  | NM_024753    | 336  | 170 | -29.99 | 3'UTR | mRNA |
| UBA52   | NM_003333    | 8493 | 187 | -50.67 | 3'UTR | mRNA |
| USH1G   | NM_173477    | 7    | 171 | -29.53 | 3'UTR | mRNA |
| VCAM1   | NM_001078    | 1852 | 172 | -32.02 | CDS   | mRNA |
| VPS13C  | NM_017684    | 501  | 177 | -24.82 | CDS   | mRNA |
| VWA5A   | NM_014622    | 416  | 175 | -29.14 | CDS   | mRNA |
| WDFY1   | NM_020830    | 1348 | 171 | -28.72 | 3'UTR | mRNA |
| WHSC1L1 | NM_023034    | 1102 | 172 | -31.32 | CDS   | mRNA |
| ZBED4   | NM_014838    | 1382 | 171 | -23.25 | 3'UTR | mRNA |
| ZC3H12A | NM_025079    | 166  | 180 | -30.17 | CDS   | mRNA |
| ZMIZ1   | NM_020338    | 3369 | 182 | -33.86 | 5'UTR | mRNA |
| ZNF132  | NM_003433    | 32   | 173 | -26.88 | CDS   | mRNA |
| ZNF134  | NM_003435    | 265  | 175 | -29.86 | 3'UTR | mRNA |
| ZNF337  | NM_015655    | 315  | 171 | -27.89 | CDS   | mRNA |
| ZNF416  | NM_017879    | 104  | 170 | -26.90 | CDS   | mRNA |
| ZNF605  | NM_183238    | 793  | 171 | -22.42 | 3'UTR | mRNA |
| ZNF618  | NM_133374    | 781  | 172 | -31.18 | 3'UTR | mRNA |
| ZNF862  | NM_001099220 | 194  | 174 | -29.87 | CDS   | mRNA |
| ZYG11B  | NM_024646    | 1493 | 174 | -24.11 | 3'UTR | mRNA |

**Supplementary Table S6D:** Putative DQ597341 piRNA target RNAs expressed in breast tumours. piRNAs targeting long non coding RNAs are shown in *italic*.

| Gene symbol      | RefSeq n.er      | Expression (normalized read count) | Alignment score | Energy (kcal/mol) | DQ597341 binding in RNA | Transcript category |
|------------------|------------------|------------------------------------|-----------------|-------------------|-------------------------|---------------------|
| MST1P2           | NR_027504        | 12                                 | 176             | -40.47            | -                       | ncRNA (pseudogene)  |
| NAPSB            | NR_002798        | 79                                 | 185             | -49.98            | -                       | ncRNA (pseudogene)  |
| <i>Clorf213</i>  | <i>NR_033690</i> | <i>31</i>                          | <i>183</i>      | <i>-44.95</i>     | -                       | <i>lncRNA</i>       |
| <i>LOC388692</i> | <i>NR_027002</i> | <i>452</i>                         | <i>174</i>      | <i>-36.82</i>     | -                       | <i>lncRNA</i>       |
| ABCA7            | NM_019112        | 170                                | 172             | -40.03            | CDS                     | mRNA                |
| ABCB9            | NM_019624        | 572                                | 170             | -33.38            | CDS                     | mRNA                |
| ABCC4            | NM_005845        | 118                                | 177             | -40.38            | CDS                     | mRNA                |
| ABCC8            | NM_000352        | 107                                | 171             | -32.00            | CDS                     | mRNA                |
| ADAM15           | NM_003815        | 8249                               | 174             | -40.45            | CDS                     | mRNA                |
| ADAMTS1          | NM_006988        | 914                                | 173             | -41.67            | CDS                     | mRNA                |
| ADAMTS7          | NM_014272        | 368                                | 170             | -42.72            | CDS                     | mRNA                |

|           |              |       |     |        |       |      |
|-----------|--------------|-------|-----|--------|-------|------|
| AGAP2     | NM_001122772 | 127   | 175 | -35.54 | CDS   | mRNA |
| AK2       | NM_001625    | 1938  | 171 | -36.49 | CDS   | mRNA |
| ALKBH2    | NM_001001655 | 386   | 172 | -37.11 | CDS   | mRNA |
| ALPK3     | NM_020778    | 144   | 174 | -48.94 | CDS   | mRNA |
| ANKRD23   | NM_144994    | 56    | 171 | -32.18 | CDS   | mRNA |
| ANKRD39   | NM_016466    | 181   | 184 | -44.19 | CDS   | mRNA |
| ANKS4B    | NM_145865    | 2     | 172 | -37.41 | CDS   | mRNA |
| ANXA4     | NM_001153    | 2198  | 177 | -47.79 | CDS   | mRNA |
| ANXA6     | NM_001155    | 3681  | 176 | -38.09 | CDS   | mRNA |
| AP2B1     | NM_001282    | 18854 | 178 | -40.57 | CDS   | mRNA |
| APEH      | NM_001640    | 1525  | 183 | -43.77 | CDS   | mRNA |
| APLP2     | NM_001642    | 18907 | 173 | -41.31 | CDS   | mRNA |
| ARF1      | NM_001024227 | 21030 | 172 | -34.65 | 5'UTR | mRNA |
| ARHGEF11  | NM_014784    | 1489  | 171 | -41.50 | CDS   | mRNA |
| ARHGEF5   | NM_005435    | 439   | 351 | -73.53 | CDS   | mRNA |
| ARID1B    | NM_017519    | 855   | 174 | -40.98 | CDS   | mRNA |
| ASAP3     | NM_017707    | 550   | 173 | -41.70 | CDS   | mRNA |
| ASTN1     | NM_004319    | 8     | 170 | -40.22 | CDS   | mRNA |
| AUTS2     | NM_015570    | 586   | 176 | -43.06 | CDS   | mRNA |
| BAZ1B     | NM_032408    | 2378  | 175 | -32.82 | CDS   | mRNA |
| BAZ2A     | NM_013449    | 2287  | 181 | -36.39 | CDS   | mRNA |
| BBS1      | NM_024649    | 535   | 349 | -70.21 | CDS   | mRNA |
| BIRC5     | NM_001168    | 418   | 200 | -48.77 | 3'UTR | mRNA |
| BMP7      | NM_001719    | 30    | 175 | -38.68 | CDS   | mRNA |
| C15orf62  | NM_001130448 | 20    | 173 | -33.81 | CDS   | mRNA |
| C17orf107 | NM_001145536 | 83    | 174 | -40.27 | CDS   | mRNA |
| C1S       | NM_001734    | 8100  | 174 | -38.28 | CDS   | mRNA |
| C2CD4B    | NM_001007595 | 169   | 172 | -38.75 | CDS   | mRNA |
| CACNA1B   | NM_000718    | 1     | 176 | -37.13 | CDS   | mRNA |
| CARD10    | NM_014550    | 272   | 171 | -37.74 | CDS   | mRNA |
| CARD14    | NM_024110    | 507   | 171 | -33.87 | CDS   | mRNA |
| CARKD     | NM_018210    | 848   | 170 | -44.84 | 5'UTR | mRNA |
| CARKD     | NM_001242882 | 848   | 170 | -44.84 | CDS   | mRNA |
| CASKIN1   | NM_020764    | 3     | 176 | -39.52 | CDS   | mRNA |
| CATSPER1  | NM_053054    | 2     | 351 | -84.86 | CDS   | mRNA |
| CATSPER1  | NM_053054    | 2     | 177 | -46.95 | 3'UTR | mRNA |
| CC2D1A    | NM_017721    | 812   | 172 | -43.01 | CDS   | mRNA |
| CCDC22    | NM_014008    | 489   | 172 | -35.27 | CDS   | mRNA |
| CCDC78    | NM_001031737 | 107   | 172 | -37.22 | CDS   | mRNA |
| CDH23     | NM_022124    | 23    | 176 | -35.08 | CDS   | mRNA |

|          |              |       |     |        |       |      |
|----------|--------------|-------|-----|--------|-------|------|
| CDH24    | NM_022478    | 220   | 182 | -46.58 | CDS   | mRNA |
| CDH3     | NM_001793    | 1142  | 171 | -38.83 | 5'UTR | mRNA |
| CDH4     | NM_001794    | 2     | 190 | -44.91 | CDS   | mRNA |
| CDKN2B   | NM_004936    | 726   | 180 | -37.95 | 5'UTR | mRNA |
| CHRM1    | NM_000738    | 4     | 171 | -36.58 | 3'UTR | mRNA |
| CHST2    | NM_004267    | 89    | 175 | -37.22 | 5'UTR | mRNA |
| CHTF18   | NM_022092    | 417   | 170 | -35.03 | CDS   | mRNA |
| CHTF8    | NM_001040146 | 1663  | 178 | -47.82 | 3'UTR | mRNA |
| CLEC16A  | NM_015226    | 832   | 173 | -33.08 | CDS   | mRNA |
| COG4     | NM_015386    | 868   | 176 | -37.28 | 3'UTR | mRNA |
| COL18A1  | NM_030582    | 4383  | 174 | -40.00 | CDS   | mRNA |
| COL5A2   | NM_000393    | 19588 | 170 | -32.66 | CDS   | mRNA |
| COL7A1   | NM_000094    | 396   | 175 | -33.44 | CDS   | mRNA |
| CORO1C   | NM_014325    | 3585  | 172 | -32.51 | CDS   | mRNA |
| CSMD1    | NM_033225    | 120   | 176 | -36.31 | CDS   | mRNA |
| CTNND2   | NM_001332    | 8     | 172 | -37.27 | CDS   | mRNA |
| CYB561D1 | NM_182580    | 70    | 170 | -35.45 | 3'UTR | mRNA |
| DEF8     | NM_207514    | 302   | 176 | -46.99 | 3'UTR | mRNA |
| DES      | NM_001927    | 6     | 178 | -41.55 | CDS   | mRNA |
| DGKI     | NM_004717    | 12    | 183 | -45.72 | CDS   | mRNA |
| DGKQ     | NM_001347    | 291   | 181 | -46.36 | CDS   | mRNA |
| DHCR7    | NM_001360    | 2917  | 175 | -31.18 | 5'UTR | mRNA |
| DHDDS    | NM_024887    | 463   | 170 | -35.71 | CDS   | mRNA |
| DHODH    | NM_001361    | 104   | 172 | -38.71 | CDS   | mRNA |
| DHRS12   | NM_001270424 | 176   | 175 | -36.25 | CDS   | mRNA |
| DHRS12   | NM_024705    | 176   | 171 | -39.26 | 3'UTR | mRNA |
| DHRS2    | NM_005794    | 89    | 170 | -34.66 | CDS   | mRNA |
| DHX58    | NM_024119    | 431   | 171 | -39.49 | CDS   | mRNA |
| DNAH3    | NM_017539    | 19    | 176 | -36.44 | CDS   | mRNA |
| DNAJC17  | NM_018163    | 272   | 178 | -34.61 | CDS   | mRNA |
| DNAJC7   | NM_003315    | 1270  | 185 | -41.08 | 5'UTR | mRNA |
| DNTTIP1  | NM_052951    | 479   | 177 | -42.90 | CDS   | mRNA |
| DPYSL2   | NM_001386    | 1259  | 173 | -31.35 | CDS   | mRNA |
| DPYSL4   | NM_006426    | 40    | 179 | -30.87 | CDS   | mRNA |
| DPYSL5   | NM_020134    | 1     | 172 | -42.46 | CDS   | mRNA |
| DRG2     | NM_001388    | 1452  | 189 | -45.05 | CDS   | mRNA |
| DSCAML1  | NM_020693    | 2     | 171 | -39.83 | CDS   | mRNA |
| ECT2L    | NM_001077706 | 6     | 172 | -32.20 | CDS   | mRNA |
| EDIL3    | NM_005711    | 498   | 171 | -45.59 | 5'UTR | mRNA |
| EFNB2    | NM_004093    | 982   | 171 | -38.30 | 3'UTR | mRNA |

|         |              |      |     |        |       |      |
|---------|--------------|------|-----|--------|-------|------|
| EIF1B   | NM_005875    | 425  | 175 | -37.72 | 5'UTR | mRNA |
| EIF2B2  | NM_014239    | 527  | 179 | -31.01 | CDS   | mRNA |
| ELF3    | NM_004433    | 4323 | 171 | -39.18 | CDS   | mRNA |
| ENY2    | NM_020189    | 923  | 173 | -49.93 | 5'UTR | mRNA |
| ERMP1   | NM_024896    | 1945 | 178 | -45.13 | 3'UTR | mRNA |
| EZR     | NM_003379    | 4060 | 174 | -35.16 | CDS   | mRNA |
| FAF1    | NM_007051    | 512  | 178 | -34.16 | 5'UTR | mRNA |
| FAM129C | NM_173544    | 1    | 173 | -42.69 | CDS   | mRNA |
| FAM13B  | NM_016603    | 356  | 176 | -41.14 | 5'UTR | mRNA |
| FAM178B | NM_001122646 | 351  | 179 | -35.53 | CDS   | mRNA |
| FAM65C  | NM_001290268 | 20   | 171 | -36.79 | 5'UTR | mRNA |
| FAM83A  | NM_032899    | 957  | 176 | -34.82 | 3'UTR | mRNA |
| FBXW9   | NM_032301    | 329  | 186 | -40.75 | CDS   | mRNA |
| FCHO1   | NM_015122    | 17   | 172 | -43.08 | CDS   | mRNA |
| FEN1    | NM_004111    | 854  | 177 | -33.96 | CDS   | mRNA |
| FES     | NM_002005    | 123  | 182 | -40.63 | CDS   | mRNA |
| FOSL1   | NM_005438    | 18   | 180 | -44.73 | CDS   | mRNA |
| FURIN   | NM_002569    | 2933 | 172 | -37.49 | CDS   | mRNA |
| G6PD    | NM_000402    | 1949 | 177 | -36.64 | CDS   | mRNA |
| GAB3    | NM_080612    | 50   | 180 | -36.16 | CDS   | mRNA |
| GFRA3   | NM_001496    | 6    | 173 | -42.96 | 3'UTR | mRNA |
| GLE1    | NM_001499    | 1003 | 177 | -42.52 | CDS   | mRNA |
| GMIP    | NM_016573    | 589  | 179 | -42.51 | CDS   | mRNA |
| GNAO1   | NM_138736    | 10   | 174 | -34.27 | 3'UTR | mRNA |
| GNAZ    | NM_002073    | 97   | 178 | -39.27 | CDS   | mRNA |
| GOPC    | NM_020399    | 864  | 177 | -35.22 | CDS   | mRNA |
| GPR108  | NM_001080452 | 901  | 178 | -35.16 | CDS   | mRNA |
| GPR162  | NM_019858    | 12   | 170 | -32.80 | CDS   | mRNA |
| GPR89A  | NM_001097613 | 1732 | 175 | -37.17 | CDS   | mRNA |
| GPR89B  | NM_016334    | 22   | 175 | -37.17 | CDS   | mRNA |
| GPR89C  | NM_001097616 | 85   | 175 | -37.17 | CDS   | mRNA |
| GRIA4   | NM_000829    | 12   | 175 | -36.46 | 5'UTR | mRNA |
| GRINA   | NM_000837    | 7013 | 170 | -35.23 | CDS   | mRNA |
| GRN     | NM_002087    | 7914 | 173 | -37.23 | CDS   | mRNA |
| GTPBP3  | NM_133644    | 255  | 179 | -37.23 | 3'UTR | mRNA |
| GUCY2D  | NM_000180    | 2    | 182 | -42.74 | CDS   | mRNA |
| HCN4    | NM_005477    | 1    | 171 | -40.72 | CDS   | mRNA |
| HEPH    | NM_138737    | 923  | 342 | -80.28 | CDS   | mRNA |
| HIC2    | NM_015094    | 105  | 175 | -46.92 | 3'UTR | mRNA |
| HRH3    | NM_007232    | 2    | 192 | -40.53 | CDS   | mRNA |

|          |              |      |     |        |       |      |
|----------|--------------|------|-----|--------|-------|------|
| IL16     | NM_172217    | 307  | 170 | -39.19 | CDS   | mRNA |
| IL7      | NM_000880    | 15   | 172 | -39.09 | 5'UTR | mRNA |
| INSR     | NM_000208    | 2400 | 178 | -36.55 | CDS   | mRNA |
| IRAK2    | NM_001570    | 25   | 170 | -36.18 | CDS   | mRNA |
| ITGA3    | NM_005501    | 1150 | 170 | -32.47 | CDS   | mRNA |
| ITGA3    | NM_002204    | 1150 | 170 | -32.47 | 3'UTR | mRNA |
| ITGB2    | NM_000211    | 1310 | 171 | -38.85 | CDS   | mRNA |
| ITPK1    | NM_014216    | 1786 | 173 | -42.39 | CDS   | mRNA |
| IWS1     | NM_017969    | 1811 | 170 | -29.49 | 5'UTR | mRNA |
| KANK3    | NM_198471    | 48   | 173 | -41.10 | CDS   | mRNA |
| KCNJ5    | NM_000890    | 74   | 177 | -41.02 | CDS   | mRNA |
| KHSRP    | NM_003685    | 2540 | 172 | -36.28 | CDS   | mRNA |
| KIAA1109 | NM_015312    | 1023 | 171 | -36.25 | CDS   | mRNA |
| KIAA1244 | NM_020340    | 1848 | 171 | -41.34 | CDS   | mRNA |
| KIAA1614 | NM_020950    | 25   | 170 | -38.41 | CDS   | mRNA |
| KIAA1683 | NM_001145304 | 10   | 174 | -35.26 | CDS   | mRNA |
| KIAA1683 | NM_025249    | 10   | 174 | -35.26 | CDS   | mRNA |
| KIF19    | NM_153209    | 3    | 171 | -33.50 | CDS   | mRNA |
| KIF21B   | NM_017596    | 165  | 174 | -38.69 | CDS   | mRNA |
| KIF7     | NM_198525    | 108  | 172 | -34.19 | CDS   | mRNA |
| KLHL2    | NM_007246    | 574  | 172 | -38.15 | CDS   | mRNA |
| KRT18    | NM_199187    | 9021 | 348 | -69.79 | CDS   | mRNA |
| LDB3     | NM_007078    | 14   | 170 | -37.16 | CDS   | mRNA |
| LEF1     | NM_016269    | 293  | 171 | -28.70 | 5'UTR | mRNA |
| LEPREL1  | NM_018192    | 57   | 170 | -34.37 | 3'UTR | mRNA |
| LGI2     | NM_018176    | 66   | 188 | -33.62 | CDS   | mRNA |
| LIMK2    | NM_001031801 | 1735 | 171 | -38.66 | CDS   | mRNA |
| LMNB2    | NM_032737    | 1572 | 171 | -41.68 | CDS   | mRNA |
| LMOD1    | NM_012134    | 895  | 176 | -35.17 | CDS   | mRNA |
| LONP1    | NM_004793    | 1948 | 179 | -32.79 | CDS   | mRNA |
| LRP1     | NM_002332    | 9336 | 170 | -37.12 | CDS   | mRNA |
| LRRC32   | NM_005512    | 749  | 173 | -29.57 | 3'UTR | mRNA |
| LSS      | NM_002340    | 546  | 170 | -37.05 | CDS   | mRNA |
| MACF1    | NM_012090    | 6051 | 173 | -38.66 | CDS   | mRNA |
| MAGEC1   | NM_005462    | 2    | 177 | -44.68 | CDS   | mRNA |
| MAP3K11  | NM_002419    | 1208 | 178 | -46.46 | 3'UTR | mRNA |
| MBTD1    | NM_017643    | 553  | 172 | -39.11 | 5'UTR | mRNA |
| MCC      | NM_002387    | 646  | 173 | -33.52 | CDS   | mRNA |
| MED23    | NM_004830    | 854  | 177 | -37.66 | 5'UTR | mRNA |
| MLF2     | NM_005439    | 4755 | 174 | -38.17 | CDS   | mRNA |

|         |              |      |     |        |       |      |
|---------|--------------|------|-----|--------|-------|------|
| MMRN2   | NM_024756    | 630  | 171 | -34.11 | CDS   | mRNA |
| MN1     | NM_002430    | 239  | 176 | -45.82 | CDS   | mRNA |
| MRPL2   | NM_015950    | 385  | 173 | -37.94 | CDS   | mRNA |
| MSRA    | NM_012331    | 62   | 171 | -35.71 | CDS   | mRNA |
| MST1    | NM_020998    | 11   | 172 | -37.83 | CDS   | mRNA |
| MYH10   | NM_005964    | 1800 | 171 | -33.95 | CDS   | mRNA |
| MYOF    | NM_013451    | 2684 | 171 | -30.88 | CDS   | mRNA |
| NAGPA   | NM_016256    | 255  | 170 | -41.09 | 3'UTR | mRNA |
| NAP1L4  | NM_005969    | 2493 | 177 | -35.31 | CDS   | mRNA |
| NAPSA   | NM_004851    | 2    | 189 | -49.46 | CDS   | mRNA |
| NHLRC4  | NM_176677    | 738  | 172 | -36.59 | 5'UTR | mRNA |
| NHSL1   | NM_020464    | 546  | 171 | -32.15 | CDS   | mRNA |
| NKX2-3  | NM_145285    | 5    | 174 | -43.74 | CDS   | mRNA |
| NLGN3   | NM_001166660 | 173  | 173 | -36.37 | CDS   | mRNA |
| NOTCH2  | NM_024408    | 8797 | 177 | -32.43 | 3'UTR | mRNA |
| NPAS1   | NM_002517    | 6    | 170 | -37.47 | CDS   | mRNA |
| NPR2    | NM_003995    | 178  | 170 | -39.08 | CDS   | mRNA |
| NR4A2   | NM_006186    | 811  | 177 | -35.21 | CDS   | mRNA |
| NRBP2   | NM_178564    | 208  | 170 | -42.85 | CDS   | mRNA |
| NRG3    | NM_001010848 | 3    | 176 | -42.21 | CDS   | mRNA |
| NRXN2   | NM_015080    | 47   | 178 | -42.24 | CDS   | mRNA |
| NRXN3   | NM_001105250 | 27   | 173 | -35.00 | CDS   | mRNA |
| NUP210  | NM_024923    | 1003 | 181 | -37.26 | CDS   | mRNA |
| OLFML2B | NM_015441    | 1297 | 182 | -43.44 | CDS   | mRNA |
| OR51E1  | NM_152430    | 47   | 170 | -27.83 | CDS   | mRNA |
| OXSM    | NM_017897    | 630  | 172 | -38.14 | 5'UTR | mRNA |
| P2RY2   | NM_002564    | 136  | 170 | -37.93 | 3'UTR | mRNA |
| PAK7    | NM_020341    | 1    | 181 | -37.68 | CDS   | mRNA |
| PARP9   | NM_031458    | 3840 | 177 | -38.29 | CDS   | mRNA |
| PCDH19  | NM_020766    | 86   | 173 | -37.44 | CDS   | mRNA |
| PCNXL2  | NM_014801    | 111  | 175 | -36.55 | CDS   | mRNA |
| PDE4C   | NM_001098819 | 4    | 174 | -30.61 | 3'UTR | mRNA |
| PDE4D   | NM_006203    | 113  | 170 | -39.72 | CDS   | mRNA |
| PDE4DIP | NM_014644    | 941  | 172 | -40.86 | 3'UTR | mRNA |
| PDLIM7  | NM_203352    | 1105 | 179 | -39.84 | CDS   | mRNA |
| PDPK1   | NM_002613    | 1151 | 170 | -38.75 | 3'UTR | mRNA |
| PFDN1   | NM_002622    | 875  | 170 | -41.68 | CDS   | mRNA |
| PGAM5   | NM_138575    | 912  | 179 | -37.05 | 3'UTR | mRNA |
| PGC     | NM_001166424 | 59   | 172 | -34.83 | CDS   | mRNA |
| PHF20   | NM_016436    | 1619 | 176 | -34.96 | CDS   | mRNA |

|          |              |      |     |        |       |      |
|----------|--------------|------|-----|--------|-------|------|
| PINK1    | NM_032409    | 875  | 173 | -34.69 | CDS   | mRNA |
| PITPNM2  | NM_020845    | 144  | 170 | -30.40 | CDS   | mRNA |
| PLA2G4C  | NM_003706    | 52   | 171 | -35.16 | CDS   | mRNA |
| PLCD1    | NM_006225    | 610  | 349 | -73.52 | CDS   | mRNA |
| PLEKHA5  | NM_001256470 | 435  | 175 | -35.37 | CDS   | mRNA |
| PLXNA1   | NM_032242    | 1379 | 171 | -39.13 | 3'UTR | mRNA |
| PNPLA6   | NM_006702    | 845  | 182 | -37.19 | CDS   | mRNA |
| PPM1H    | NM_020700    | 1011 | 179 | -37.78 | 3'UTR | mRNA |
| PPP1R3B  | NM_024607    | 2106 | 179 | -37.51 | CDS   | mRNA |
| PPP4R1   | NM_005134    | 1430 | 182 | -37.90 | CDS   | mRNA |
| PSAT1    | NM_058179    | 431  | 170 | -36.42 | CDS   | mRNA |
| PSMC4    | NM_153001    | 1617 | 170 | -33.59 | CDS   | mRNA |
| PTCHD2   | NM_020780    | 6    | 175 | -37.05 | CDS   | mRNA |
| PTPRB    | NM_002837    | 541  | 170 | -35.60 | CDS   | mRNA |
| RAB20    | NM_017817    | 539  | 180 | -35.39 | 5'UTR | mRNA |
| RAB34    | NM_031934    | 438  | 170 | -44.95 | 5'UTR | mRNA |
| RCAN3    | NM_001251979 | 105  | 177 | -34.00 | 5'UTR | mRNA |
| RCOR1    | NM_015156    | 1153 | 173 | -32.07 | 3'UTR | mRNA |
| REM2     | NM_173527    | 4    | 171 | -40.70 | CDS   | mRNA |
| RNF20    | NM_019592    | 1741 | 170 | -32.99 | CDS   | mRNA |
| RNF214   | NM_207343    | 218  | 176 | -41.76 | CDS   | mRNA |
| RNF31    | NM_017999    | 567  | 189 | -40.88 | CDS   | mRNA |
| RPS29    | NM_001032    | 6592 | 178 | -35.62 | 3'UTR | mRNA |
| RTL1     | NM_001134888 | 21   | 170 | -38.31 | CDS   | mRNA |
| RTN1     | NM_021136    | 59   | 176 | -38.52 | CDS   | mRNA |
| RYR3     | NM_001036    | 14   | 178 | -42.53 | CDS   | mRNA |
| SDC3     | NM_014654    | 2085 | 170 | -35.15 | CDS   | mRNA |
| SDK2     | NM_001144952 | 72   | 171 | -41.72 | 3'UTR | mRNA |
| SDPR     | NM_004657    | 85   | 178 | -40.96 | CDS   | mRNA |
| SEC14L5  | NM_014692    | 2    | 180 | -39.37 | 3'UTR | mRNA |
| SEC24D   | NM_014822    | 2512 | 189 | -41.86 | CDS   | mRNA |
| SELP     | NM_003005    | 3    | 177 | -36.84 | CDS   | mRNA |
| SEP1     | NM_052838    | 53   | 171 | -34.77 | CDS   | mRNA |
| SERINC2  | NM_018565    | 2031 | 179 | -46.07 | 5'UTR | mRNA |
| SGSM1    | NM_001098497 | 23   | 171 | -37.22 | CDS   | mRNA |
| SHANK1   | NM_016148    | 4    | 173 | -37.22 | CDS   | mRNA |
| SIT1     | NM_014450    | 30   | 170 | -39.05 | CDS   | mRNA |
| SLC12A9  | NM_020246    | 633  | 170 | -37.03 | CDS   | mRNA |
| SLC23A1  | NM_005847    | 18   | 172 | -40.11 | CDS   | mRNA |
| SLC25A39 | NM_016016    | 2572 | 173 | -39.22 | CDS   | mRNA |

|          |              |      |     |        |       |      |
|----------|--------------|------|-----|--------|-------|------|
| SLC4A8   | NM_001039960 | 406  | 171 | -34.72 | 3'UTR | mRNA |
| SLC9A3   | NM_004174    | 1    | 174 | -32.37 | CDS   | mRNA |
| SLFN14   | NM_001129820 | 1    | 178 | -32.02 | CDS   | mRNA |
| SMTN     | NM_006932    | 703  | 172 | -33.28 | CDS   | mRNA |
| SPEF1    | NM_015417    | 65   | 178 | -42.14 | 3'UTR | mRNA |
| SPRY2    | NM_005842    | 96   | 172 | -40.27 | CDS   | mRNA |
| SRPX2    | NM_014467    | 561  | 178 | -44.91 | CDS   | mRNA |
| ST5      | NM_005418    | 1357 | 171 | -39.31 | CDS   | mRNA |
| STK10    | NM_005990    | 921  | 171 | -35.36 | 3'UTR | mRNA |
| SURF1    | NM_003172    | 855  | 175 | -44.13 | CDS   | mRNA |
| SYNPO    | NM_001109974 | 1293 | 172 | -36.20 | 3'UTR | mRNA |
| TBC1D12  | NM_015188    | 241  | 171 | -33.06 | CDS   | mRNA |
| TFEB     | NM_007162    | 176  | 170 | -40.00 | CDS   | mRNA |
| TINAGL1  | NM_022164    | 192  | 170 | -38.76 | CDS   | mRNA |
| TLX1     | NM_005521    | 4    | 175 | -40.41 | CDS   | mRNA |
| TMEM104  | NM_017728    | 500  | 177 | -37.04 | CDS   | mRNA |
| TMEM130  | NM_152913    | 139  | 174 | -42.00 | CDS   | mRNA |
| TMEM44   | NM_138399    | 152  | 175 | -42.64 | CDS   | mRNA |
| TMEM50B  | NM_006134    | 692  | 190 | -35.08 | CDS   | mRNA |
| TNF      | NM_000594    | 6    | 173 | -28.55 | CDS   | mRNA |
| TNFRSF21 | NM_014452    | 789  | 177 | -33.67 | CDS   | mRNA |
| TNK2     | NM_005781    | 1823 | 179 | -34.69 | CDS   | mRNA |
| TRAM1L1  | NM_152402    | 98   | 172 | -36.30 | 5'UTR | mRNA |
| TRH      | NM_007117    | 1    | 174 | -37.35 | CDS   | mRNA |
| TRIM29   | NM_012101    | 274  | 173 | -37.29 | CDS   | mRNA |
| TRIM3    | NM_001248006 | 454  | 172 | -34.90 | 5'UTR | mRNA |
| TRIM39   | NM_021253    | 338  | 175 | -39.54 | CDS   | mRNA |
| TRIM45   | NM_025188    | 118  | 171 | -32.76 | 5'UTR | mRNA |
| TRO      | NM_016157    | 88   | 172 | -42.13 | CDS   | mRNA |
| TROVE2   | NM_001173524 | 1421 | 173 | -40.21 | 5'UTR | mRNA |
| TRPT1    | NM_031472    | 297  | 172 | -42.29 | CDS   | mRNA |
| TRRAP    | NM_003496    | 2268 | 171 | -38.27 | CDS   | mRNA |
| TSPYL2   | NM_022117    | 343  | 170 | -34.64 | CDS   | mRNA |
| TTBK1    | NM_032538    | 65   | 170 | -39.93 | 5'UTR | mRNA |
| TYK2     | NM_003331    | 1012 | 190 | -39.61 | CDS   | mRNA |
| UBQLN4   | NM_020131    | 3763 | 170 | -36.27 | 3'UTR | mRNA |
| UBXN10   | NM_152376    | 207  | 179 | -36.86 | CDS   | mRNA |
| UNC13B   | NM_006377    | 683  | 178 | -34.49 | CDS   | mRNA |
| USP18    | NM_017414    | 712  | 170 | -34.50 | CDS   | mRNA |
| VCL      | NM_003373    | 4249 | 170 | -38.34 | CDS   | mRNA |



|         |              |      |     |        |       |      |
|---------|--------------|------|-----|--------|-------|------|
| VSIG10L | NM_001163922 | 46   | 188 | -42.91 | CDS   | mRNA |
| VWA2    | NM_001272046 | 221  | 172 | -39.14 | CDS   | mRNA |
| WARS2   | NM_015836    | 686  | 175 | -39.43 | CDS   | mRNA |
| WDR81   | NM_152348    | 657  | 172 | -49.95 | CDS   | mRNA |
| XIRP1   | NM_194293    | 54   | 192 | -43.83 | CDS   | mRNA |
| ZBTB22  | NM_005453    | 409  | 173 | -39.92 | CDS   | mRNA |
| ZBTB7C  | NM_001039360 | 242  | 191 | -50.58 | CDS   | mRNA |
| ZC3H7B  | NM_017590    | 1926 | 174 | -37.33 | CDS   | mRNA |
| ZKSCAN1 | NM_003439    | 964  | 170 | -34.27 | 3'UTR | mRNA |
| ZNF541  | NM_001277075 | 18   | 170 | -33.29 | CDS   | mRNA |
| ZNF592  | NM_014630    | 627  | 181 | -42.82 | CDS   | mRNA |
| ZNF750  | NM_024702    | 66   | 172 | -35.83 | CDS   | mRNA |

**Supplementary Table S6E:** Putative DQ598252 piRNA target RNAs expressed in breast tumours.

| Gene symbol | RefSeq n.er | Expression (normalized read count) | Alignment score | Energy (kcal/mol) | DQ598252 binding in RNA | Transcript category |
|-------------|-------------|------------------------------------|-----------------|-------------------|-------------------------|---------------------|
| ARF3        | NM_001659   | 7125                               | 174             | -26.14            | CDS                     | mRNA                |
| BDH2        | NM_020139   | 386                                | 170             | -34.55            | 3'UTR                   | mRNA                |
| DNAH14      | NM_001373   | 172                                | 174             | -24.77            | CDS                     | mRNA                |
| DOT1L       | NM_032482   | 527                                | 173             | -32.12            | CDS                     | mRNA                |
| ESPNL       | NM_194312   | 1                                  | 172             | -39.39            | CDS                     | mRNA                |
| HECW1       | NM_015052   | 15                                 | 181             | -33.26            | CDS                     | mRNA                |
| ICAM5       | NM_003259   | 3                                  | 170             | -33.54            | CDS                     | mRNA                |
| IGSF10      | NM_178822   | 59                                 | 173             | -31.48            | CDS                     | mRNA                |
| IL34        | NM_152456   | 87                                 | 171             | -33.60            | 5'UTR                   | mRNA                |
| MAST1       | NM_014975   | 3                                  | 171             | -28.58            | CDS                     | mRNA                |
| MTOR        | NM_004958   | 1223                               | 170             | -25.73            | CDS                     | mRNA                |
| NDUFV3      | NM_021075   | 747                                | 174             | -29.06            | CDS                     | mRNA                |
| NID2        | NM_007361   | 1526                               | 174             | -28.95            | CDS                     | mRNA                |
| PLXNA1      | NM_032242   | 1379                               | 175             | -36.31            | CDS                     | mRNA                |
| QARS        | NM_005051   | 2817                               | 176             | -31.41            | CDS                     | mRNA                |
| RAB7L1      | NM_003929   | 1703                               | 176             | -31.40            | CDS                     | mRNA                |
| SORBS1      | NM_006434   | 1669                               | 174             | -35.13            | CDS                     | mRNA                |
| SORT1       | NM_002959   | 2108                               | 171             | -36.03            | CDS                     | mRNA                |
| TMEM229B    | NM_182526   | 180                                | 178             | -30.28            | 3'UTR                   | mRNA                |
| TTC19       | NM_017775   | 673                                | 173             | -30.98            | 5'UTR                   | mRNA                |

|        |              |      |     |        |       |      |
|--------|--------------|------|-----|--------|-------|------|
| TTC37  | NM_014639    | 1044 | 171 | -28.83 | CDS   | mRNA |
| U2AF1  | NM_001025204 | 1279 | 175 | -37.18 | 5'UTR | mRNA |
| ZNF609 | NM_015042    | 1759 | 171 | -34.68 | CDS   | mRNA |

**Supplementary Table S6F:** Putative DQ596311 piRNA target RNAs expressed in breast tumours. piRNAs targeting long non coding RNAs are shown in *italic*.

| Gene symbol     | RefSeq n.er      | Expression (normalized read count) | Alignment score | Energy (kcal/mol) | DQ596311 binding in RNA | Transcript category |
|-----------------|------------------|------------------------------------|-----------------|-------------------|-------------------------|---------------------|
| CCDC144B        | NR_036647        | 43                                 | 170             | -25.49            | -                       | ncRNA (pseudogene)  |
| HSP90AB4P       | NR_073415        | 3                                  | 184             | -27.27            | -                       | ncRNA (pseudogene)  |
| LOC154761       | NR_015421        | 44                                 | 175             | -25.81            | -                       | ncRNA (pseudogene)  |
| LOC493754       | NR_002933        | 274                                | 182             | -29.12            | -                       | ncRNA (pseudogene)  |
| <i>CASC2</i>    | <i>NR_026939</i> | <i>33</i>                          | <i>175</i>      | <i>-23.13</i>     | -                       | <i>lncRNA</i>       |
| <i>FLJ41941</i> | <i>NR_024417</i> | <i>2</i>                           | <i>175</i>      | <i>-20.81</i>     | -                       | <i>lncRNA</i>       |
| ABCB11          | NM_003742        | 1                                  | 174             | -25.70            | CDS                     | mRNA                |
| ABCB6           | NM_005689        | 1135                               | 173             | -39.79            | CDS                     | mRNA                |
| ABCC1           | NM_004996        | 2573                               | 172             | -28.57            | CDS                     | mRNA                |
| ABCD2           | NM_005164        | 4                                  | 174             | -32.16            | CDS                     | mRNA                |
| ABI1            | NM_005470        | 1190                               | 182             | -26.14            | 3'UTR                   | mRNA                |
| ACN9            | NM_020186        | 187                                | 172             | -27.76            | 3'UTR                   | mRNA                |
| ACO2            | NM_001098        | 3053                               | 173             | -24.02            | CDS                     | mRNA                |
| ACTC1           | NM_005159        | 4                                  | 186             | -35.94            | CDS                     | mRNA                |
| ADAM10          | NM_001110        | 1757                               | 175             | -27.56            | 3'UTR                   | mRNA                |
| ADAMTS14        | NM_080722        | 96                                 | 175             | -36.06            | CDS                     | mRNA                |
| ADCY10          | NM_018417        | 10                                 | 179             | -26.99            | CDS                     | mRNA                |
| ADRA1A          | NM_033303        | 3                                  | 172             | -30.26            | 3'UTR                   | mRNA                |
| AFF1            | NM_005935        | 1702                               | 172             | -26.41            | 3'UTR                   | mRNA                |
| AGL             | NM_000644        | 7645                               | 171             | -28.07            | 5'UTR                   | mRNA                |
| AGPS            | NM_003659        | 554                                | 176             | -27.96            | 3'UTR                   | mRNA                |
| AKNA            | NM_030767        | 500                                | 170             | -27.08            | 3'UTR                   | mRNA                |
| AKR1C1          | NM_001353        | 12                                 | 173             | -27.85            | 5'UTR                   | mRNA                |

|           |              |      |     |        |       |      |
|-----------|--------------|------|-----|--------|-------|------|
| AKR1C2    | NM_001354    | 11   | 173 | -27.85 | 5'UTR | mRNA |
| AKT3      | NM_005465    | 491  | 172 | -28.18 | 3'UTR | mRNA |
| ALDH6A1   | NM_001278594 | 730  | 352 | -53.67 | 5'UTR | mRNA |
| ALDH6A1   | NM_005589    | 730  | 352 | -53.67 | CDS   | mRNA |
| ALPK3     | NM_020778    | 144  | 174 | -26.98 | 3'UTR | mRNA |
| AMZ1      | NM_133463    | 19   | 174 | -24.94 | 3'UTR | mRNA |
| ANAPC16   | NM_173473    | 1568 | 188 | -28.51 | 3'UTR | mRNA |
| ANGPT2    | NM_001147    | 666  | 173 | -25.50 | 3'UTR | mRNA |
| APLNR     | NM_005161    | 590  | 183 | -29.73 | 3'UTR | mRNA |
| ARF4      | NM_001660    | 5185 | 178 | -26.84 | CDS   | mRNA |
| ARHGAP11A | NM_199357    | 284  | 180 | -26.87 | CDS   | mRNA |
| ARHGAP29  | NM_004815    | 692  | 170 | -26.91 | CDS   | mRNA |
| ARHGEF12  | NM_015313    | 3635 | 174 | -26.05 | 3'UTR | mRNA |
| ARHGEF38  | NM_001242729 | 51   | 178 | -28.79 | CDS   | mRNA |
| ARMC8     | NM_015396    | 570  | 170 | -24.13 | 3'UTR | mRNA |
| ARMCX5    | NM_022838    | 374  | 170 | -25.45 | CDS   | mRNA |
| ASAP2     | NM_003887    | 839  | 176 | -32.64 | 3'UTR | mRNA |
| ATP10D    | NM_020453    | 255  | 173 | -23.02 | CDS   | mRNA |
| ATP12A    | NM_001676    | 1    | 179 | -33.31 | CDS   | mRNA |
| ATP5G3    | NM_001689    | 2761 | 179 | -28.94 | CDS   | mRNA |
| ATP9A     | NM_006045    | 1853 | 177 | -22.59 | 3'UTR | mRNA |
| ATXN7L3B  | NM_001136262 | 4150 | 170 | -22.58 | 3'UTR | mRNA |
| B3GNTL1   | NM_001009905 | 94   | 184 | -37.94 | CDS   | mRNA |
| BCKDK     | NM_005881    | 2679 | 170 | -29.82 | CDS   | mRNA |
| BCL11B    | NM_022898    | 59   | 173 | -30.57 | 3'UTR | mRNA |
| BCL2L11   | NM_207002    | 1016 | 173 | -20.32 | 3'UTR | mRNA |
| BTN3A2    | NM_007047    | 1415 | 174 | -25.31 | 3'UTR | mRNA |
| BTN3A3    | NM_006994    | 612  | 173 | -26.69 | 3'UTR | mRNA |
| C14orf28  | NM_001017923 | 61   | 187 | -33.77 | CDS   | mRNA |
| C17orf80  | NM_017941    | 533  | 172 | -24.33 | 3'UTR | mRNA |
| C1GALT1C1 | NM_152692    | 675  | 170 | -25.28 | CDS   | mRNA |
| C1orf210  | NM_182517    | 120  | 174 | -36.51 | 3'UTR | mRNA |
| C1S       | NM_201442    | 8100 | 171 | -22.84 | CDS   | mRNA |
| C9orf114  | NM_016390    | 383  | 177 | -29.71 | 3'UTR | mRNA |
| CACNA1E   | NM_000721    | 2    | 172 | -23.74 | CDS   | mRNA |
| CALCOCO1  | NM_020898    | 936  | 183 | -32.44 | 3'UTR | mRNA |
| CAMK2A    | NM_171825    | 6    | 174 | -25.29 | 3'UTR | mRNA |
| CBWD5     | NM_001286835 | 2    | 170 | -20.72 | 5'UTR | mRNA |
| CBX5      | NM_012117    | 3027 | 174 | -22.98 | 3'UTR | mRNA |
| CCNL1     | NM_020307    | 703  | 178 | -32.73 | CDS   | mRNA |

|            |              |       |     |        |       |      |
|------------|--------------|-------|-----|--------|-------|------|
| CCNL2      | NM_030937    | 759   | 177 | -31.37 | CDS   | mRNA |
| CD302      | NM_014880    | 452   | 188 | -27.44 | CDS   | mRNA |
| CD96       | NM_005816    | 115   | 176 | -25.20 | 3'UTR | mRNA |
| CELSR3     | NM_001407    | 425   | 172 | -42.71 | CDS   | mRNA |
| CEP350     | NM_014810    | 1802  | 175 | -27.01 | CDS   | mRNA |
| CHURC1     | NM_145165    | 1130  | 179 | -30.41 | 3'UTR | mRNA |
| CLDN10     | NM_182848    | 8     | 179 | -28.18 | 5'UTR | mRNA |
| CLDN14     | NM_144492    | 15    | 172 | -26.06 | CDS   | mRNA |
| CLDN19     | NM_148960    | 7     | 173 | -31.64 | 3'UTR | mRNA |
| CLMN       | NM_024734    | 1020  | 170 | -28.25 | 3'UTR | mRNA |
| CLN5       | NM_006493    | 632   | 172 | -32.24 | 3'UTR | mRNA |
| CNOT7      | NM_013354    | 1988  | 170 | -24.44 | 3'UTR | mRNA |
| CNP        | NM_033133    | 2231  | 170 | -28.24 | 3'UTR | mRNA |
| CNTNAP3    | NM_033655    | 5     | 173 | -27.70 | CDS   | mRNA |
| COCH       | NM_004086    | 10    | 172 | -26.00 | CDS   | mRNA |
| COL13A1    | NM_080800    | 65    | 177 | -31.48 | CDS   | mRNA |
| COL9A3     | NM_001853    | 54    | 173 | -34.17 | CDS   | mRNA |
| CPA4       | NM_016352    | 140   | 179 | -21.39 | CDS   | mRNA |
| CPD        | NM_001304    | 17929 | 173 | -26.75 | 3'UTR | mRNA |
| CPEB1      | NM_030594    | 4     | 170 | -21.88 | CDS   | mRNA |
| CRY2       | NM_021117    | 506   | 189 | -33.05 | CDS   | mRNA |
| CSGALNACT2 | NM_018590    | 802   | 173 | -24.24 | CDS   | mRNA |
| CSPG4      | NM_001897    | 1005  | 172 | -26.53 | CDS   | mRNA |
| CYTH4      | NM_013385    | 287   | 173 | -30.48 | 3'UTR | mRNA |
| DAAM1      | NM_014992    | 519   | 175 | -24.41 | 3'UTR | mRNA |
| DBH        | NM_000787    | 1     | 178 | -28.78 | CDS   | mRNA |
| DDI2       | NM_032341    | 109   | 170 | -28.37 | 3'UTR | mRNA |
| DDX10      | NM_004398    | 776   | 187 | -34.96 | CDS   | mRNA |
| DDX23      | NM_004818    | 3837  | 170 | -28.05 | CDS   | mRNA |
| DFFB       | NM_001282669 | 79    | 172 | -23.40 | CDS   | mRNA |
| DHTKD1     | NM_018706    | 2650  | 175 | -20.79 | CDS   | mRNA |
| DHX33      | NM_020162    | 382   | 170 | -26.30 | 3'UTR | mRNA |
| DNAJC14    | NM_032364    | 1489  | 171 | -26.59 | CDS   | mRNA |
| DNAJC18    | NM_152686    | 80    | 192 | -33.77 | 3'UTR | mRNA |
| DOC2A      | NM_003586    | 7     | 172 | -24.47 | CDS   | mRNA |
| DR1        | NM_001938    | 821   | 171 | -21.55 | 3'UTR | mRNA |
| DTNA       | NM_032975    | 22    | 171 | -29.12 | 3'UTR | mRNA |
| EFR3A      | NM_015137    | 6167  | 173 | -24.70 | 3'UTR | mRNA |
| EGFL6      | NM_015507    | 181   | 171 | -23.03 | CDS   | mRNA |
| EIF1AX     | NM_001412    | 2080  | 173 | -21.78 | 3'UTR | mRNA |

|          |              |      |     |        |       |      |
|----------|--------------|------|-----|--------|-------|------|
| EIF2B2   | NM_014239    | 527  | 181 | -30.77 | CDS   | mRNA |
| ELK4     | NM_001973    | 231  | 170 | -23.84 | CDS   | mRNA |
| ELTD1    | NM_022159    | 563  | 181 | -28.91 | CDS   | mRNA |
| ERAP1    | NM_016442    | 1153 | 176 | -24.77 | CDS   | mRNA |
| ESR1     | NM_000125    | 257  | 170 | -30.83 | 3'UTR | mRNA |
| ESYT1    | NM_015292    | 2687 | 172 | -33.52 | CDS   | mRNA |
| FAM102A  | NM_203305    | 1802 | 174 | -22.44 | 5'UTR | mRNA |
| FAM102A  | NM_001035254 | 1802 | 174 | -23.58 | CDS   | mRNA |
| FAM115C  | NM_001130026 | 225  | 178 | -24.97 | 3'UTR | mRNA |
| FAM126A  | NM_032581    | 226  | 174 | -31.33 | 3'UTR | mRNA |
| FAM135A  | NM_020819    | 76   | 170 | -25.42 | CDS   | mRNA |
| FAM160A1 | NM_001109977 | 108  | 182 | -27.97 | CDS   | mRNA |
| FAM160B1 | NM_020940    | 633  | 177 | -27.57 | 3'UTR | mRNA |
| FAM76B   | NM_144664    | 240  | 177 | -26.71 | 3'UTR | mRNA |
| FAM98B   | NM_173611    | 291  | 175 | -24.55 | 3'UTR | mRNA |
| FAT3     | NM_001008781 | 38   | 170 | -28.39 | CDS   | mRNA |
| FBXO9    | NM_012347    | 526  | 183 | -30.46 | 3'UTR | mRNA |
| FBXW2    | NM_012164    | 2135 | 171 | -26.51 | 3'UTR | mRNA |
| FERMT1   | NM_017671    | 10   | 182 | -33.85 | 3'UTR | mRNA |
| FGD4     | NM_139241    | 124  | 177 | -27.08 | 3'UTR | mRNA |
| FGF12    | NM_004113    | 14   | 175 | -25.93 | 3'UTR | mRNA |
| FHDC1    | NM_033393    | 275  | 171 | -36.92 | CDS   | mRNA |
| FKBP11   | NM_001143782 | 484  | 173 | -24.43 | 3'UTR | mRNA |
| FLJ44635 | NM_207422    | 19   | 171 | -22.81 | CDS   | mRNA |
| FLRT3    | NM_198391    | 349  | 172 | -23.94 | CDS   | mRNA |
| FOXD2    | NM_004474    | 45   | 171 | -20.15 | 3'UTR | mRNA |
| FPR1     | NM_002029    | 119  | 177 | -33.99 | CDS   | mRNA |
| FREM1    | NM_144966    | 20   | 173 | -24.83 | CDS   | mRNA |
| FSTL1    | NM_007085    | 9905 | 180 | -25.75 | 3'UTR | mRNA |
| FTO      | NM_001080432 | 1107 | 177 | -25.40 | 3'UTR | mRNA |
| G3BP1    | NM_005754    | 2638 | 170 | -29.38 | CDS   | mRNA |
| GAPVD1   | NM_001282679 | 1052 | 177 | -30.71 | CDS   | mRNA |
| GDA      | NM_004293    | 1    | 170 | -30.61 | 3'UTR | mRNA |
| GNL1     | NM_005275    | 918  | 170 | -25.71 | 3'UTR | mRNA |
| GPR126   | NM_020455    | 325  | 183 | -23.77 | CDS   | mRNA |
| GPR173   | NM_018969    | 9    | 178 | -30.44 | 3'UTR | mRNA |
| GPR97    | NM_170776    | 5    | 171 | -25.93 | CDS   | mRNA |
| GPR98    | NM_032119    | 62   | 174 | -39.14 | CDS   | mRNA |
| GPRIN3   | NM_198281    | 79   | 176 | -28.33 | 3'UTR | mRNA |
| GPX7     | NM_015696    | 248  | 175 | -29.25 | 3'UTR | mRNA |

|          |              |       |     |        |       |      |
|----------|--------------|-------|-----|--------|-------|------|
| GRHL1    | NM_198182    | 1345  | 173 | -21.13 | 3'UTR | mRNA |
| GRIA1    | NM_000827    | 4     | 175 | -32.57 | CDS   | mRNA |
| GRIK3    | NM_000831    | 15    | 179 | -26.73 | CDS   | mRNA |
| GRSF1    | NM_002092    | 2947  | 190 | -29.19 | 3'UTR | mRNA |
| GUCY2D   | NM_000180    | 2     | 196 | -30.65 | CDS   | mRNA |
| HARS2    | NM_012208    | 617   | 170 | -29.73 | CDS   | mRNA |
| HDAC10   | NM_032019    | 370   | 174 | -24.50 | CDS   | mRNA |
| HEXB     | NM_000521    | 2140  | 170 | -22.83 | CDS   | mRNA |
| HGF      | NM_000601    | 50    | 181 | -24.54 | CDS   | mRNA |
| HIP1     | NM_005338    | 2169  | 171 | -31.05 | 3'UTR | mRNA |
| HK2      | NM_000189    | 5144  | 180 | -27.93 | 5'UTR | mRNA |
| HMCN1    | NM_031935    | 1352  | 172 | -33.33 | CDS   | mRNA |
| HS2ST1   | NM_012262    | 1307  | 172 | -21.61 | 3'UTR | mRNA |
| HSDL2    | NM_032303    | 1093  | 178 | -27.75 | 3'UTR | mRNA |
| IKZF2    | NM_016260    | 57    | 171 | -26.58 | 3'UTR | mRNA |
| IL13RA1  | NM_001560    | 8494  | 174 | -21.13 | 3'UTR | mRNA |
| IL17REL  | NM_001001694 | 4     | 170 | -27.79 | 3'UTR | mRNA |
| INADL    | NM_176877    | 2283  | 170 | -22.55 | 3'UTR | mRNA |
| INPP5B   | NM_005540    | 330   | 171 | -21.65 | 3'UTR | mRNA |
| INPP5F   | NM_014937    | 549   | 179 | -30.41 | CDS   | mRNA |
| INTS3    | NM_023015    | 3484  | 179 | -36.62 | CDS   | mRNA |
| INTS8    | NM_017864    | 1461  | 170 | -26.05 | CDS   | mRNA |
| IRAK1    | NM_001569    | 2281  | 172 | -22.09 | 3'UTR | mRNA |
| ITGAV    | NM_002210    | 4875  | 171 | -28.76 | CDS   | mRNA |
| ITGB5    | NM_002213    | 11279 | 175 | -33.35 | CDS   | mRNA |
| ITPRIPL1 | NM_001008949 | 11    | 188 | -33.29 | CDS   | mRNA |
| JARID2   | NM_004973    | 1028  | 174 | -29.48 | 5'UTR | mRNA |
| JKAMP    | NM_016475    | 769   | 177 | -27.05 | CDS   | mRNA |
| KCTD3    | NM_016121    | 3494  | 173 | -31.33 | 3'UTR | mRNA |
| KIAA0196 | NM_014846    | 1437  | 175 | -29.39 | CDS   | mRNA |
| KIAA0556 | NM_015202    | 1123  | 170 | -26.73 | CDS   | mRNA |
| KIF24    | NM_194313    | 266   | 170 | -21.62 | 3'UTR | mRNA |
| KLF13    | NM_015995    | 642   | 170 | -30.58 | 3'UTR | mRNA |
| KLHL12   | NM_021633    | 1587  | 171 | -34.71 | CDS   | mRNA |
| KLHL23   | NM_144711    | 84    | 176 | -24.40 | CDS   | mRNA |
| KLK2     | NM_005551    | 3     | 177 | -22.48 | 3'UTR | mRNA |
| KRAS     | NM_004985    | 1062  | 175 | -26.62 | 3'UTR | mRNA |
| KRT80    | NM_182507    | 137   | 172 | -25.47 | 3'UTR | mRNA |
| LAG3     | NM_002286    | 77    | 170 | -36.19 | CDS   | mRNA |
| LDLRAD3  | NM_174902    | 465   | 180 | -31.70 | CDS   | mRNA |

|        |              |       |     |        |       |      |
|--------|--------------|-------|-----|--------|-------|------|
| LIPG   | NM_006033    | 65    | 171 | -26.96 | CDS   | mRNA |
| LPGAT1 | NM_014873    | 4515  | 172 | -30.03 | 3'UTR | mRNA |
| LPIN2  | NM_014646    | 1574  | 170 | -25.41 | 3'UTR | mRNA |
| LRP2   | NM_004525    | 444   | 342 | -52.99 | CDS   | mRNA |
| LRRC4  | NM_022143    | 27    | 172 | -30.94 | CDS   | mRNA |
| LRRC59 | NM_018509    | 5725  | 180 | -30.28 | 3'UTR | mRNA |
| LSM2   | NM_021177    | 830   | 170 | -26.93 | 3'UTR | mRNA |
| MACF1  | NM_012090    | 6051  | 175 | -32.40 | CDS   | mRNA |
| MAGED1 | NM_006986    | 6905  | 185 | -38.98 | CDS   | mRNA |
| MAGI1  | NM_004742    | 273   | 176 | -28.29 | CDS   | mRNA |
| MAN1A1 | NM_005907    | 1475  | 179 | -22.79 | 3'UTR | mRNA |
| MAST3  | NM_015016    | 269   | 171 | -30.76 | CDS   | mRNA |
| MATN2  | NM_002380    | 88    | 362 | -63.42 | CDS   | mRNA |
| MCM4   | NM_005914    | 4190  | 173 | -26.66 | 3'UTR | mRNA |
| MERTK  | NM_006343    | 133   | 176 | -23.48 | CDS   | mRNA |
| MGAT4A | NM_012214    | 3732  | 177 | -30.61 | 3'UTR | mRNA |
| MGRN1  | NM_015246    | 2091  | 172 | -30.25 | 3'UTR | mRNA |
| MORN4  | NM_178832    | 118   | 171 | -29.63 | 3'UTR | mRNA |
| MPZ    | NM_000530    | 8     | 174 | -23.87 | 3'UTR | mRNA |
| MR1    | NM_001531    | 349   | 170 | -21.31 | 3'UTR | mRNA |
| MTA3   | NM_020744    | 1918  | 180 | -32.64 | CDS   | mRNA |
| MTFR1  | NM_014637    | 1710  | 171 | -25.57 | 3'UTR | mRNA |
| MTX3   | NM_001167741 | 346   | 171 | -23.53 | 3'UTR | mRNA |
| MUC12  | NM_001164462 | 1     | 182 | -31.37 | CDS   | mRNA |
| MUC16  | NM_024690    | 13    | 347 | -55.17 | CDS   | mRNA |
| MYB    | NM_005375    | 1847  | 172 | -24.53 | CDS   | mRNA |
| MYBPC1 | NM_002465    | 52    | 174 | -29.90 | CDS   | mRNA |
| MYO1D  | NM_015194    | 2754  | 172 | -27.61 | CDS   | mRNA |
| NAA25  | NM_024953    | 908   | 171 | -28.03 | 3'UTR | mRNA |
| NAV3   | NM_014903    | 88    | 345 | -47.87 | CDS   | mRNA |
| NCDN   | NM_014284    | 924   | 170 | -23.14 | 3'UTR | mRNA |
| NCKAP1 | NM_205842    | 3531  | 172 | -25.62 | 3'UTR | mRNA |
| NDUFA4 | NM_002489    | 2807  | 172 | -22.44 | 3'UTR | mRNA |
| NDUFB5 | NM_002492    | 1451  | 170 | -22.55 | CDS   | mRNA |
| NOTCH2 | NM_024408    | 8797  | 175 | -21.62 | CDS   | mRNA |
| NR1D2  | NM_005126    | 613   | 182 | -29.34 | 3'UTR | mRNA |
| NT5C2  | NM_012229    | 1043  | 186 | -30.90 | 3'UTR | mRNA |
| NUCKS1 | NM_022731    | 13941 | 172 | -25.29 | 3'UTR | mRNA |
| NUDT10 | NM_153183    | 53    | 172 | -21.73 | 3'UTR | mRNA |
| NUP210 | NM_024923    | 1003  | 176 | -28.62 | CDS   | mRNA |

|         |              |      |     |        |       |      |
|---------|--------------|------|-----|--------|-------|------|
| NUP62   | NM_012346    | 1790 | 175 | -38.44 | CDS   | mRNA |
| OPA3    | NM_001017989 | 475  | 175 | -27.80 | 3'UTR | mRNA |
| OR52E6  | NM_001005167 | 1    | 181 | -26.75 | CDS   | mRNA |
| OSBPL11 | NM_022776    | 553  | 173 | -24.72 | CDS   | mRNA |
| PARVA   | NM_018222    | 2215 | 170 | -26.17 | 3'UTR | mRNA |
| PAWR    | NM_002583    | 282  | 171 | -25.23 | 3'UTR | mRNA |
| PCSK6   | NM_138325    | 695  | 180 | -28.60 | CDS   | mRNA |
| PDCD11  | NM_014976    | 1889 | 182 | -28.57 | CDS   | mRNA |
| PDCD2   | NM_002598    | 289  | 173 | -25.24 | 3'UTR | mRNA |
| PDCD6IP | NM_001256192 | 4154 | 174 | -27.43 | 3'UTR | mRNA |
| PDPR    | NM_017990    | 487  | 171 | -24.26 | 3'UTR | mRNA |
| PDZD2   | NM_178140    | 885  | 174 | -34.52 | CDS   | mRNA |
| PELP1   | NM_001278241 | 1242 | 176 | -30.10 | 5'UTR | mRNA |
| PELP1   | NM_014389    | 1242 | 176 | -30.10 | CDS   | mRNA |
| PER3    | NM_016831    | 152  | 172 | -30.06 | CDS   | mRNA |
| PGLYRP4 | NM_020393    | 5    | 178 | -28.69 | CDS   | mRNA |
| PHC3    | NM_024947    | 1050 | 347 | -49.00 | 3'UTR | mRNA |
| PHF1    | NM_002636    | 494  | 176 | -30.60 | CDS   | mRNA |
| PHKG2   | NM_000294    | 778  | 188 | -31.16 | 3'UTR | mRNA |
| PID1    | NM_017933    | 59   | 172 | -28.81 | 3'UTR | mRNA |
| PIK3C2G | NM_004570    | 72   | 184 | -28.80 | CDS   | mRNA |
| PIK3R4  | NM_014602    | 1200 | 179 | -31.84 | CDS   | mRNA |
| PIWIL4  | NM_152431    | 9    | 172 | -34.58 | 5'UTR | mRNA |
| PKHD1L1 | NM_177531    | 17   | 180 | -31.83 | CDS   | mRNA |
| PLA1A   | NM_001206961 | 62   | 192 | -33.70 | 5'UTR | mRNA |
| PLA1A   | NM_015900    | 62   | 192 | -33.70 | CDS   | mRNA |
| PLD2    | NM_002663    | 664  | 176 | -31.24 | CDS   | mRNA |
| PLEKHG5 | NM_001042665 | 137  | 185 | -27.25 | 5'UTR | mRNA |
| PLEKHM3 | NM_001080475 | 199  | 177 | -32.33 | 3'UTR | mRNA |
| PMEPA1  | NM_199171    | 2672 | 170 | -28.96 | 3'UTR | mRNA |
| POLA1   | NM_016937    | 577  | 172 | -23.85 | CDS   | mRNA |
| POM121  | NM_172020    | 1374 | 175 | -25.58 | CDS   | mRNA |
| POM121C | NM_001099415 | 648  | 173 | -28.28 | CDS   | mRNA |
| POMT2   | NM_013382    | 442  | 184 | -33.79 | CDS   | mRNA |
| PPIL2   | NM_014337    | 1618 | 170 | -22.07 | 3'UTR | mRNA |
| PPP5K2  | NM_015216    | 731  | 171 | -24.97 | 3'UTR | mRNA |
| PPP2R1A | NM_014225    | 5912 | 171 | -30.61 | 3'UTR | mRNA |
| PPRC1   | NM_015062    | 1349 | 187 | -34.97 | CDS   | mRNA |
| PTCHD2  | NM_020780    | 6    | 170 | -24.74 | CDS   | mRNA |
| PTGS1   | NM_000962    | 330  | 172 | -24.93 | 3'UTR | mRNA |



|          |              |      |     |        |       |      |
|----------|--------------|------|-----|--------|-------|------|
| PTH2R    | NM_005048    | 22   | 178 | -27.40 | CDS   | mRNA |
| PTPN13   | NM_006264    | 885  | 174 | -24.44 | CDS   | mRNA |
| PTPN14   | NM_005401    | 128  | 175 | -27.57 | 3'UTR | mRNA |
| PTPN4    | NM_002830    | 234  | 172 | -24.33 | 3'UTR | mRNA |
| PTPRJ    | NM_002843    | 833  | 179 | -26.89 | CDS   | mRNA |
| RAB3GAP1 | NM_012233    | 1919 | 185 | -30.36 | CDS   | mRNA |
| RAB7L1   | NM_003929    | 1703 | 174 | -21.71 | 3'UTR | mRNA |
| RALBP1   | NM_006788    | 2378 | 170 | -23.13 | 3'UTR | mRNA |
| RAP1GAP2 | NM_015085    | 209  | 170 | -24.61 | 3'UTR | mRNA |
| RBM15B   | NM_013286    | 2602 | 177 | -28.89 | CDS   | mRNA |
| RBMX     | NM_002139    | 3277 | 178 | -30.68 | CDS   | mRNA |
| RBMXL1   | NM_019610    | 418  | 178 | -30.68 | CDS   | mRNA |
| RCOR3    | NM_001136225 | 965  | 174 | -23.49 | 3'UTR | mRNA |
| RELN     | NM_005045    | 1    | 171 | -22.87 | CDS   | mRNA |
| RGL1     | NM_015149    | 473  | 170 | -28.36 | 3'UTR | mRNA |
| RGS1     | NM_002922    | 2990 | 170 | -22.51 | 3'UTR | mRNA |
| RNF121   | NM_018320    | 378  | 172 | -25.71 | CDS   | mRNA |
| RNF123   | NM_022064    | 453  | 172 | -20.96 | 3'UTR | mRNA |
| RNF14    | NM_004290    | 768  | 173 | -21.87 | 3'UTR | mRNA |
| RNF169   | NM_001098638 | 429  | 196 | -31.54 | CDS   | mRNA |
| RNF38    | NM_022781    | 756  | 172 | -30.20 | 3'UTR | mRNA |
| RRM2B    | NM_015713    | 921  | 187 | -23.15 | 3'UTR | mRNA |
| RSC1A1   | NM_006511    | 218  | 170 | -28.37 | CDS   | mRNA |
| RUNX3    | NM_004350    | 153  | 174 | -26.12 | 3'UTR | mRNA |
| RYR2     | NM_001035    | 6    | 170 | -24.18 | CDS   | mRNA |
| SBF1     | NM_002972    | 529  | 172 | -34.83 | CDS   | mRNA |
| SCN2A    | NM_021007    | 10   | 181 | -26.53 | CDS   | mRNA |
| SCN3A    | NM_006922    | 1    | 179 | -26.66 | CDS   | mRNA |
| SCN4A    | NM_000334    | 19   | 170 | -29.95 | CDS   | mRNA |
| SCN4B    | NM_174934    | 147  | 171 | -33.13 | 3'UTR | mRNA |
| SCN7A    | NM_002976    | 12   | 170 | -26.50 | CDS   | mRNA |
| SCN8A    | NM_014191    | 68   | 174 | -23.71 | CDS   | mRNA |
| SCN9A    | NM_002977    | 9    | 171 | -21.05 | CDS   | mRNA |
| SCYL3    | NM_020423    | 666  | 174 | -21.27 | CDS   | mRNA |
| SDCBP    | NM_005625    | 2773 | 171 | -30.96 | CDS   | mRNA |
| SDHC     | NM_003001    | 3362 | 174 | -33.35 | 3'UTR | mRNA |
| SEC24C   | NM_004922    | 2470 | 182 | -32.14 | 3'UTR | mRNA |
| SERAC1   | NM_032861    | 92   | 173 | -28.92 | 3'UTR | mRNA |
| SGMS2    | NM_152621    | 534  | 349 | -54.84 | 3'UTR | mRNA |
| SGPL1    | NM_003901    | 2376 | 176 | -28.99 | CDS   | mRNA |

|          |              |      |     |        |       |      |
|----------|--------------|------|-----|--------|-------|------|
| SH3TC2   | NM_024577    | 21   | 172 | -27.85 | 3'UTR | mRNA |
| SHROOM4  | NM_020717    | 252  | 173 | -23.26 | CDS   | mRNA |
| SLAMF1   | NM_003037    | 33   | 172 | -34.11 | 5'UTR | mRNA |
| SLC12A9  | NM_020246    | 633  | 172 | -27.65 | CDS   | mRNA |
| SLC16A10 | NM_018593    | 17   | 200 | -42.23 | CDS   | mRNA |
| SLC23A2  | NM_005116    | 541  | 184 | -34.20 | 3'UTR | mRNA |
| SLC24A3  | NM_020689    | 157  | 170 | -29.36 | CDS   | mRNA |
| SLC25A13 | NM_014251    | 600  | 174 | -28.93 | 3'UTR | mRNA |
| SLC25A17 | NM_006358    | 1272 | 171 | -25.77 | CDS   | mRNA |
| SLC25A23 | NM_024103    | 1187 | 171 | -25.33 | 3'UTR | mRNA |
| SLC26A2  | NM_000112    | 484  | 175 | -25.29 | CDS   | mRNA |
| SLC26A7  | NM_052832    | 27   | 171 | -28.78 | 3'UTR | mRNA |
| SLC28A3  | NM_022127    | 253  | 170 | -24.21 | CDS   | mRNA |
| SLC2A13  | NM_052885    | 701  | 170 | -24.62 | 3'UTR | mRNA |
| SLC2A4   | NM_001042    | 20   | 171 | -28.86 | CDS   | mRNA |
| SLC37A4  | NM_001467    | 674  | 172 | -31.79 | CDS   | mRNA |
| SLC39A11 | NM_139177    | 1991 | 171 | -30.18 | 3'UTR | mRNA |
| SLC7A1   | NM_003045    | 804  | 173 | -33.82 | CDS   | mRNA |
| SLCO2A1  | NM_005630    | 241  | 186 | -29.73 | CDS   | mRNA |
| SMNDC1   | NM_005871    | 760  | 173 | -28.46 | 3'UTR | mRNA |
| SMOC1    | NM_022137    | 20   | 172 | -24.79 | 3'UTR | mRNA |
| SPDYE3   | NM_001004351 | 45   | 184 | -28.66 | CDS   | mRNA |
| SPTBN1   | NM_003128    | 3711 | 172 | -23.74 | 3'UTR | mRNA |
| SRP54    | NM_003136    | 1296 | 171 | -20.48 | CDS   | mRNA |
| SUFU     | NM_016169    | 635  | 172 | -24.75 | 3'UTR | mRNA |
| SYN2     | NM_003178    | 2    | 181 | -29.57 | CDS   | mRNA |
| SYNGAP1  | NM_006772    | 187  | 172 | -30.22 | CDS   | mRNA |
| SYNGR2   | NM_004710    | 6233 | 173 | -28.03 | 3'UTR | mRNA |
| SYNRG    | NM_007247    | 681  | 170 | -26.78 | CDS   | mRNA |
| SYTL5    | NM_138780    | 264  | 171 | -22.38 | 3'UTR | mRNA |
| TAF11    | NM_005643    | 827  | 175 | -25.58 | 3'UTR | mRNA |
| TAS2R31  | NM_176885    | 1    | 170 | -20.35 | CDS   | mRNA |
| TAS2R46  | NM_176887    | 1    | 170 | -20.35 | CDS   | mRNA |
| TEP1     | NM_007110    | 565  | 175 | -28.95 | CDS   | mRNA |
| TGFBI    | NM_000358    | 3471 | 176 | -25.55 | CDS   | mRNA |
| THAP6    | NM_144721    | 168  | 173 | -21.21 | 3'UTR | mRNA |
| TJP1     | NM_003257    | 1790 | 175 | -31.04 | CDS   | mRNA |
| TM6SF1   | NM_023003    | 100  | 172 | -25.99 | CDS   | mRNA |
| TMEM165  | NM_018475    | 2099 | 170 | -25.00 | 3'UTR | mRNA |
| TMEM170B | NM_001100829 | 204  | 171 | -23.80 | 3'UTR | mRNA |

|          |              |      |     |        |       |      |
|----------|--------------|------|-----|--------|-------|------|
| TMEM182  | NM_144632    | 120  | 173 | -28.46 | CDS   | mRNA |
| TMEM194A | NM_015257    | 657  | 172 | -30.72 | 3'UTR | mRNA |
| TMEM2    | NM_013390    | 1811 | 171 | -31.49 | 3'UTR | mRNA |
| TMEM218  | NM_001258247 | 268  | 173 | -23.49 | 3'UTR | mRNA |
| TMTC2    | NM_152588    | 259  | 170 | -23.66 | CDS   | mRNA |
| TOR1AIP2 | NM_022347    | 590  | 173 | -24.95 | 3'UTR | mRNA |
| TRAK2    | NM_015049    | 1486 | 176 | -23.24 | CDS   | mRNA |
| TRAM1L1  | NM_152402    | 98   | 176 | -31.70 | CDS   | mRNA |
| TRAM2    | NM_012288    | 1567 | 171 | -32.85 | 3'UTR | mRNA |
| TRDMT1   | NM_004412    | 50   | 174 | -31.45 | 3'UTR | mRNA |
| TRDN     | NM_001251987 | 4    | 171 | -23.59 | 3'UTR | mRNA |
| TRIM2    | NM_015271    | 151  | 179 | -27.61 | 3'UTR | mRNA |
| TRIM36   | NM_018700    | 257  | 174 | -25.30 | 3'UTR | mRNA |
| TRRAP    | NM_003496    | 2268 | 175 | -24.94 | CDS   | mRNA |
| TSKU     | NM_015516    | 1000 | 180 | -34.36 | CDS   | mRNA |
| TSTD2    | NM_139246    | 448  | 179 | -21.99 | 3'UTR | mRNA |
| TTF1     | NM_007344    | 408  | 175 | -25.30 | CDS   | mRNA |
| TUBA3C   | NM_006001    | 1    | 173 | -21.12 | CDS   | mRNA |
| UBASH3B  | NM_032873    | 87   | 183 | -30.94 | 3'UTR | mRNA |
| UBL4A    | NM_014235    | 1134 | 179 | -25.47 | 3'UTR | mRNA |
| UBN2     | NM_173569    | 599  | 174 | -27.44 | 3'UTR | mRNA |
| UGT1A10  | NM_019075    | 6    | 174 | -24.83 | CDS   | mRNA |
| UGT1A7   | NM_019077    | 1    | 170 | -22.91 | CDS   | mRNA |
| UNC5C    | NM_003728    | 61   | 170 | -26.50 | 3'UTR | mRNA |
| USH2A    | NM_206933    | 6    | 173 | -22.89 | CDS   | mRNA |
| USP24    | NM_015306    | 2152 | 173 | -25.74 | CDS   | mRNA |
| USP31    | NM_020718    | 401  | 351 | -46.71 | 3'UTR | mRNA |
| VANGL2   | NM_020335    | 1155 | 178 | -30.27 | 3'UTR | mRNA |
| VN1R5    | NM_173858    | 1    | 171 | -21.29 | CDS   | mRNA |
| VPS13A   | NM_001018038 | 440  | 175 | -27.23 | 3'UTR | mRNA |
| VPS13B   | NM_152564    | 1026 | 172 | -24.84 | CDS   | mRNA |
| WHSC1    | NM_007331    | 1469 | 178 | -23.22 | 3'UTR | mRNA |
| WWP1     | NM_007013    | 1923 | 176 | -33.81 | CDS   | mRNA |
| XAF1     | NM_017523    | 1143 | 171 | -25.07 | 3'UTR | mRNA |
| XPNPEP1  | NM_020383    | 934  | 174 | -22.71 | CDS   | mRNA |
| XPO7     | NM_015024    | 2560 | 177 | -25.71 | CDS   | mRNA |
| YTHDF3   | NM_152758    | 2502 | 175 | -20.26 | CDS   | mRNA |
| ZNF280B  | NM_080764    | 6    | 181 | -27.73 | 3'UTR | mRNA |
| ZNF451   | NM_001257273 | 522  | 175 | -24.20 | 3'UTR | mRNA |
| ZNF484   | NM_031486    | 73   | 174 | -28.63 | CDS   | mRNA |

|        |              |      |     |        |       |      |
|--------|--------------|------|-----|--------|-------|------|
| ZNF586 | NM_017652    | 102  | 182 | -30.87 | 3'UTR | mRNA |
| ZNF704 | NM_001033723 | 305  | 173 | -31.59 | 3'UTR | mRNA |
| ZNF75A | NM_153028    | 680  | 174 | -22.74 | 3'UTR | mRNA |
| ZNF813 | NM_001004301 | 168  | 170 | -32.71 | 3'UTR | mRNA |
| ZW10   | NM_004724    | 493  | 177 | -25.12 | 3'UTR | mRNA |
| ZYG11B | NM_024646    | 1493 | 173 | -22.57 | 3'UTR | mRNA |

**Supplementary Table S6G:** Putative DQ598677 piRNA target RNAs expressed in breast tumours. piRNAs targeting long non coding RNAs are shown in *italic*.

| Gene symbol      | RefSeq n.er      | Expression (normalized read count) | Alignment score | Energy (kcal/mol) | DQ598677 binding in RNA | Transcript category |
|------------------|------------------|------------------------------------|-----------------|-------------------|-------------------------|---------------------|
| GTF2IP1          | NR_002206        | 5050                               | 173             | -29.59            | -                       | ncRNA (pseudogene)  |
| LOC653653        | NR_027408        | 57                                 | 180             | -29.15            | -                       | ncRNA (pseudogene)  |
| SDHAP2           | NR_003265        | 204                                | 177             | -31.35            | -                       | ncRNA (pseudogene)  |
| <i>KCNQ1OT1</i>  | <i>NR_002728</i> | 79                                 | 175             | -28.94            | -                       | <i>lncRNA</i>       |
| <i>LOC388692</i> | <i>NR_027002</i> | 452                                | 177             | -31.27            | -                       | <i>lncRNA</i>       |
| ABCB10           | NM_012089        | 647                                | 172             | -28.32            | CDS                     | mRNA                |
| ABCC2            | NM_000392        | 322                                | 170             | -25.23            | CDS                     | mRNA                |
| ABCC5            | NM_005688        | 1645                               | 173             | -23.89            | CDS                     | mRNA                |
| ACE              | NM_000789        | 724                                | 175             | -25.40            | CDS                     | mRNA                |
| ACTR2            | NM_005722        | 10022                              | 171             | -23.67            | CDS                     | mRNA                |
| ACVR2B           | NM_001106        | 421                                | 178             | -21.59            | 3'UTR                   | mRNA                |
| ADAM2            | NM_001464        | 11                                 | 170             | -32.90            | CDS                     | mRNA                |
| AIMP1            | NM_004757        | 1073                               | 170             | -25.80            | 5'UTR                   | mRNA                |
| ALDH3A2          | NM_000382        | 2015                               | 172             | -23.32            | CDS                     | mRNA                |
| AMOTL1           | NM_130847        | 797                                | 170             | -21.90            | 3'UTR                   | mRNA                |
| ANK2             | NM_001148        | 149                                | 172             | -21.85            | CDS                     | mRNA                |
| AP1S2            | NM_003916        | 263                                | 180             | -29.15            | CDS                     | mRNA                |
| APC              | NM_000038        | 685                                | 171             | -21.30            | CDS                     | mRNA                |
| APOL1            | NM_003661        | 3585                               | 175             | -28.61            | CDS                     | mRNA                |
| ARAP1            | NM_015242        | 1398                               | 184             | -40.02            | CDS                     | mRNA                |
| ARV1             | NM_022786        | 508                                | 177             | -21.59            | CDS                     | mRNA                |
| ASH2L            | NM_004674        | 1009                               | 172             | -26.74            | CDS                     | mRNA                |
| ATP13A5          | NM_198505        | 182                                | 170             | -25.67            | CDS                     | mRNA                |

|          |              |       |     |        |       |      |
|----------|--------------|-------|-----|--------|-------|------|
| ATP9A    | NM_006045    | 1853  | 172 | -29.16 | CDS   | mRNA |
| ATRIP    | NM_130384    | 233   | 171 | -34.65 | CDS   | mRNA |
| B3GNT4   | NM_030765    | 7     | 174 | -30.59 | 3'UTR | mRNA |
| BCL2L15  | NM_001010922 | 13    | 170 | -34.58 | CDS   | mRNA |
| BDP1     | NM_018429    | 555   | 175 | -22.31 | CDS   | mRNA |
| BMS1     | NM_014753    | 1396  | 174 | -24.37 | CDS   | mRNA |
| BRD4     | NM_014299    | 1788  | 180 | -35.86 | CDS   | mRNA |
| BTBD2    | NM_017797    | 1772  | 170 | -34.70 | CDS   | mRNA |
| C5       | NM_001735    | 38    | 170 | -32.27 | CDS   | mRNA |
| C6orf132 | NM_001164446 | 187   | 171 | -23.68 | 3'UTR | mRNA |
| CAMK1G   | NM_020439    | 7     | 171 | -27.04 | CDS   | mRNA |
| CAPN6    | NM_014289    | 6     | 172 | -23.33 | 3'UTR | mRNA |
| CCDC132  | NM_017667    | 476   | 171 | -26.62 | CDS   | mRNA |
| CCDC54   | NM_032600    | 1     | 173 | -21.17 | CDS   | mRNA |
| CCDC68   | NM_025214    | 2     | 175 | -20.25 | CDS   | mRNA |
| CD163    | NM_004244    | 798   | 181 | -27.89 | CDS   | mRNA |
| CD34     | NM_001025109 | 1580  | 170 | -32.52 | CDS   | mRNA |
| CD34     | NM_001773    | 1580  | 175 | -29.23 | 3'UTR | mRNA |
| CDH18    | NM_004934    | 1     | 173 | -37.38 | CDS   | mRNA |
| CDHR1    | NM_033100    | 15    | 170 | -27.09 | CDS   | mRNA |
| CDK5RAP2 | NM_018249    | 1649  | 170 | -23.99 | CDS   | mRNA |
| CDON     | NM_016952    | 133   | 170 | -22.74 | CDS   | mRNA |
| CEBPZ    | NM_005760    | 1404  | 173 | -37.79 | CDS   | mRNA |
| CEL      | NM_001807    | 3     | 187 | -34.85 | CDS   | mRNA |
| CENPE    | NM_001813    | 442   | 186 | -27.20 | CDS   | mRNA |
| CNTLN    | NM_017738    | 87    | 171 | -24.55 | CDS   | mRNA |
| CTNND2   | NM_001332    | 8     | 174 | -51.68 | CDS   | mRNA |
| CUX1     | NM_181552    | 961   | 174 | -24.00 | 3'UTR | mRNA |
| CWC22    | NM_020943    | 663   | 176 | -26.61 | CDS   | mRNA |
| DBH      | NM_000787    | 1     | 170 | -39.59 | CDS   | mRNA |
| DDX55    | NM_020936    | 534   | 191 | -34.40 | CDS   | mRNA |
| DEF6     | NM_022047    | 248   | 176 | -28.89 | CDS   | mRNA |
| DHRS9    | NM_199204    | 7     | 171 | -24.87 | 5'UTR | mRNA |
| DICER1   | NM_030621    | 1001  | 173 | -30.49 | 3'UTR | mRNA |
| DLEC1    | NM_007337    | 11    | 170 | -27.44 | CDS   | mRNA |
| DLL1     | NM_005618    | 88    | 179 | -32.31 | CDS   | mRNA |
| DMP1     | NM_004407    | 2     | 182 | -37.95 | CDS   | mRNA |
| DNAH3    | NM_017539    | 19    | 178 | -25.46 | CDS   | mRNA |
| DSCR3    | NM_006052    | 555   | 173 | -30.52 | CDS   | mRNA |
| EEF1G    | NM_001404    | 18050 | 172 | -20.37 | CDS   | mRNA |

|           |              |      |     |        |       |      |
|-----------|--------------|------|-----|--------|-------|------|
| EFCAB5    | NM_198529    | 4    | 170 | -31.09 | CDS   | mRNA |
| ENPP2     | NM_006209    | 786  | 174 | -33.69 | CDS   | mRNA |
| EPB41L1   | NM_177996    | 1615 | 170 | -36.65 | 3'UTR | mRNA |
| EPS8L1    | NM_017729    | 357  | 171 | -32.41 | 3'UTR | mRNA |
| ERN1      | NM_001433    | 122  | 177 | -40.28 | CDS   | mRNA |
| EVC       | NM_153717    | 680  | 174 | -27.40 | CDS   | mRNA |
| F8        | NM_000132    | 172  | 170 | -26.46 | CDS   | mRNA |
| FAF2      | NM_014613    | 1660 | 177 | -26.68 | 3'UTR | mRNA |
| FAM105A   | NM_019018    | 204  | 174 | -32.57 | CDS   | mRNA |
| FAM115A   | NM_014719    | 389  | 170 | -20.28 | 3'UTR | mRNA |
| FAM136A   | NM_032822    | 1332 | 170 | -36.90 | 3'UTR | mRNA |
| FAM69A    | NM_001006605 | 295  | 350 | -61.42 | CDS   | mRNA |
| FER       | NM_005246    | 25   | 170 | -25.38 | CDS   | mRNA |
| FILIP1    | NM_015687    | 63   | 170 | -24.19 | CDS   | mRNA |
| FOXK2     | NM_004514    | 1661 | 182 | -24.18 | 3'UTR | mRNA |
| FRAS1     | NM_001166133 | 60   | 170 | -29.94 | 3'UTR | mRNA |
| FRK       | NM_002031    | 156  | 171 | -30.45 | 3'UTR | mRNA |
| GAB2      | NM_012296    | 277  | 176 | -29.67 | 3'UTR | mRNA |
| GABRD     | NM_000815    | 103  | 179 | -26.85 | 3'UTR | mRNA |
| GARS      | NM_002047    | 2466 | 174 | -31.77 | CDS   | mRNA |
| GATAD2B   | NM_020699    | 1167 | 182 | -27.09 | 3'UTR | mRNA |
| GCSH      | NM_004483    | 1    | 180 | -23.05 | 3'UTR | mRNA |
| GPAM      | NM_020918    | 407  | 170 | -26.00 | CDS   | mRNA |
| GPM6A     | NM_201592    | 2    | 172 | -24.60 | 3'UTR | mRNA |
| GPR155    | NM_152529    | 248  | 171 | -38.87 | CDS   | mRNA |
| GRAMD4    | NM_015124    | 1268 | 170 | -32.71 | CDS   | mRNA |
| GRID1     | NM_017551    | 42   | 172 | -30.16 | CDS   | mRNA |
| GTF2I     | NM_001518    | 3012 | 173 | -29.59 | CDS   | mRNA |
| GTF2IRD2  | NM_173537    | 118  | 353 | -61.49 | CDS   | mRNA |
| GTF2IRD2B | NM_001003795 | 42   | 353 | -61.49 | CDS   | mRNA |
| GUCY1A3   | NM_000856    | 688  | 174 | -30.20 | 3'UTR | mRNA |
| GXYLT2    | NM_001080393 | 162  | 173 | -34.65 | CDS   | mRNA |
| HADHB     | NM_000183    | 2375 | 170 | -24.73 | CDS   | mRNA |
| HECW1     | NM_015052    | 15   | 170 | -31.76 | CDS   | mRNA |
| HELB      | NM_033647    | 50   | 171 | -28.64 | CDS   | mRNA |
| HNRNPUL1  | NM_144732    | 5797 | 171 | -37.64 | CDS   | mRNA |
| IFI30     | NM_006332    | 6459 | 178 | -28.06 | CDS   | mRNA |
| IKZF3     | NM_012481    | 172  | 178 | -30.19 | 3'UTR | mRNA |
| IL15      | NM_000585    | 42   | 177 | -25.95 | CDS   | mRNA |
| ITM2C     | NM_001287241 | 731  | 171 | -31.07 | 5'UTR | mRNA |

|        |              |       |     |        |       |      |
|--------|--------------|-------|-----|--------|-------|------|
| JAK1   | NM_002227    | 7209  | 171 | -27.10 | CDS   | mRNA |
| JPH1   | NM_020647    | 3     | 180 | -32.70 | CDS   | mRNA |
| KCNAB1 | NM_003471    | 20    | 174 | -30.86 | 3'UTR | mRNA |
| KCNC4  | NM_004978    | 98    | 170 | -32.86 | CDS   | mRNA |
| KCNMB2 | NM_005832    | 1     | 171 | -23.03 | CDS   | mRNA |
| KIF14  | NM_014875    | 244   | 182 | -32.22 | 3'UTR | mRNA |
| KLK10  | NM_002776    | 7     | 175 | -43.12 | CDS   | mRNA |
| LAP3   | NM_015907    | 2749  | 180 | -25.46 | CDS   | mRNA |
| LONP2  | NM_031490    | 4545  | 180 | -33.54 | CDS   | mRNA |
| LRRC42 | NM_052940    | 1101  | 175 | -26.76 | CDS   | mRNA |
| LRRN3  | NM_018334    | 33    | 177 | -40.64 | 5'UTR | mRNA |
| MACF1  | NM_012090    | 6051  | 175 | -27.87 | CDS   | mRNA |
| MAP3K5 | NM_005923    | 539   | 174 | -26.88 | CDS   | mRNA |
| MAP3K7 | NM_003188    | 690   | 184 | -28.29 | 3'UTR | mRNA |
| MBP    | NM_002385    | 207   | 172 | -27.11 | 3'UTR | mRNA |
| MCM4   | NM_182746    | 4190  | 174 | -27.22 | 3'UTR | mRNA |
| MDN1   | NM_014611    | 1128  | 189 | -30.97 | CDS   | mRNA |
| MKI67  | NM_002417    | 2612  | 170 | -31.43 | CDS   | mRNA |
| MRPS11 | NM_176805    | 510   | 174 | -40.61 | 5'UTR | mRNA |
| MSTN   | NM_005259    | 1     | 180 | -30.60 | CDS   | mRNA |
| MUC5B  | NM_002458    | 20414 | 173 | -31.46 | CDS   | mRNA |
| MUC6   | NM_005961    | 10    | 175 | -33.97 | CDS   | mRNA |
| MYH10  | NM_005964    | 1800  | 173 | -22.44 | 3'UTR | mRNA |
| MYH7B  | NM_020884    | 13    | 180 | -35.08 | CDS   | mRNA |
| MYO1D  | NM_015194    | 2754  | 171 | -31.49 | CDS   | mRNA |
| NCAPH2 | NM_152299    | 689   | 170 | -25.45 | 3'UTR | mRNA |
| NEB    | NM_004543    | 14    | 170 | -22.11 | CDS   | mRNA |
| NEFL   | NM_006158    | 3     | 174 | -34.15 | 3'UTR | mRNA |
| NEU1   | NM_000434    | 1898  | 173 | -32.19 | CDS   | mRNA |
| NOL8   | NM_001256394 | 801   | 185 | -35.83 | 5'UTR | mRNA |
| NOL8   | NM_017948    | 801   | 185 | -35.83 | CDS   | mRNA |
| NUP188 | NM_015354    | 1342  | 181 | -32.88 | CDS   | mRNA |
| NUP214 | NM_005085    | 1669  | 170 | -30.87 | CDS   | mRNA |
| OSBPL2 | NM_001278649 | 1204  | 176 | -29.28 | 5'UTR | mRNA |
| PCDH7  | NM_032457    | 680   | 175 | -27.49 | 3'UTR | mRNA |
| PCDHA4 | NM_018907    | 138   | 178 | -25.91 | CDS   | mRNA |
| PCDHA7 | NM_018910    | 84    | 174 | -24.36 | CDS   | mRNA |
| PCDHA9 | NM_014005    | 1     | 174 | -24.36 | CDS   | mRNA |
| PCNXL2 | NM_014801    | 111   | 176 | -28.81 | CDS   | mRNA |
| PDE1A  | NM_005019    | 52    | 172 | -27.76 | CDS   | mRNA |

|          |              |       |     |        |       |      |
|----------|--------------|-------|-----|--------|-------|------|
| PDHB     | NM_000925    | 1074  | 172 | -22.90 | 3'UTR | mRNA |
| PDPN     | NM_006474    | 767   | 173 | -32.15 | CDS   | mRNA |
| PDSS1    | NM_014317    | 139   | 177 | -30.45 | CDS   | mRNA |
| PFKL     | NM_002626    | 3655  | 172 | -40.27 | CDS   | mRNA |
| PHF14    | NM_014660    | 1192  | 179 | -26.29 | CDS   | mRNA |
| PHOSPHO2 | NM_001199288 | 50    | 182 | -27.74 | CDS   | mRNA |
| PIAS4    | NM_015897    | 362   | 176 | -23.86 | CDS   | mRNA |
| PKHD1    | NM_138694    | 6     | 184 | -28.81 | CDS   | mRNA |
| PLCG2    | NM_002661    | 186   | 171 | -30.98 | CDS   | mRNA |
| PLCXD1   | NM_018390    | 350   | 171 | -34.17 | CDS   | mRNA |
| PM20D2   | NM_001010853 | 89    | 172 | -30.75 | CDS   | mRNA |
| POLH     | NM_006502    | 520   | 175 | -26.07 | 3'UTR | mRNA |
| POLQ     | NM_199420    | 243   | 170 | -20.64 | 3'UTR | mRNA |
| POLR2B   | NM_000938    | 2410  | 176 | -33.55 | CDS   | mRNA |
| POLR3B   | NM_018082    | 598   | 173 | -24.54 | 3'UTR | mRNA |
| POMC     | NM_000939    | 2     | 173 | -26.68 | CDS   | mRNA |
| PPEF1    | NM_006240    | 88    | 170 | -23.86 | CDS   | mRNA |
| PRUNE2   | NM_015225    | 142   | 184 | -36.13 | CDS   | mRNA |
| PTPN2    | NM_002828    | 694   | 174 | -33.09 | CDS   | mRNA |
| PTPN3    | NM_002829    | 505   | 187 | -31.71 | CDS   | mRNA |
| RABGAP1  | NM_012197    | 1698  | 171 | -42.71 | CDS   | mRNA |
| RAD54L   | NM_003579    | 135   | 174 | -24.42 | CDS   | mRNA |
| RBM27    | NM_018989    | 782   | 174 | -25.51 | CDS   | mRNA |
| RECK     | NM_021111    | 425   | 173 | -22.66 | CDS   | mRNA |
| RFX6     | NM_173560    | 4     | 170 | -25.65 | 3'UTR | mRNA |
| RIMS2    | NM_014677    | 3     | 181 | -33.18 | CDS   | mRNA |
| RNF213   | NM_020954    | 4979  | 185 | -33.59 | CDS   | mRNA |
| ROCK2    | NM_004850    | 830   | 172 | -23.90 | CDS   | mRNA |
| RTKN2    | NM_145307    | 167   | 174 | -28.68 | CDS   | mRNA |
| RYR1     | NM_000540    | 33    | 170 | -23.22 | CDS   | mRNA |
| SACS     | NM_014363    | 536   | 170 | -23.37 | 3'UTR | mRNA |
| SALL2    | NM_005407    | 278   | 171 | -32.82 | CDS   | mRNA |
| SCN2B    | NM_004588    | 7     | 174 | -30.22 | 3'UTR | mRNA |
| SCN9A    | NM_002977    | 9     | 175 | -25.87 | CDS   | mRNA |
| SFRP2    | NM_003013    | 12452 | 183 | -30.94 | CDS   | mRNA |
| SGSM2    | NM_014853    | 404   | 172 | -34.10 | CDS   | mRNA |
| SHC4     | NM_203349    | 25    | 170 | -30.42 | CDS   | mRNA |
| SIK1     | NM_173354    | 1037  | 175 | -37.29 | 3'UTR | mRNA |
| SLC23A2  | NM_203327    | 541   | 199 | -36.12 | CDS   | mRNA |
| SLC35E2  | NM_182838    | 904   | 176 | -35.74 | CDS   | mRNA |



|           |              |      |     |        |       |      |
|-----------|--------------|------|-----|--------|-------|------|
| SLC39A8   | NM_022154    | 283  | 170 | -29.22 | CDS   | mRNA |
| SLC9A4    | NM_001011552 | 2    | 174 | -26.80 | CDS   | mRNA |
| SNX1      | NM_148955    | 1628 | 183 | -33.39 | CDS   | mRNA |
| SORBS2    | NM_003603    | 223  | 170 | -25.98 | CDS   | mRNA |
| SPATA5    | NM_145207    | 188  | 176 | -24.44 | CDS   | mRNA |
| STAB2     | NM_017564    | 2    | 177 | -37.04 | CDS   | mRNA |
| STARD13   | NM_001243476 | 296  | 174 | -31.15 | 5'UTR | mRNA |
| STEAP4    | NM_024636    | 138  | 173 | -27.95 | 3'UTR | mRNA |
| STXBP1    | NM_003165    | 164  | 173 | -29.35 | CDS   | mRNA |
| SYNE1     | NM_033071    | 828  | 170 | -20.13 | CDS   | mRNA |
| TAF1      | NM_004606    | 1133 | 175 | -27.25 | 3'UTR | mRNA |
| TAX1BP1   | NM_001206901 | 3182 | 173 | -29.26 | 5'UTR | mRNA |
| TECPR2    | NM_014844    | 350  | 175 | -32.83 | 3'UTR | mRNA |
| THUMPD1   | NM_017736    | 2850 | 182 | -26.58 | 3'UTR | mRNA |
| TLE2      | NM_003260    | 254  | 171 | -30.24 | CDS   | mRNA |
| TMEM150A  | NM_001031738 | 532  | 171 | -30.58 | 3'UTR | mRNA |
| TNFRSF10B | NM_147187    | 661  | 190 | -34.82 | 3'UTR | mRNA |
| TNPO3     | NM_012470    | 1047 | 177 | -23.57 | CDS   | mRNA |
| TPP2      | NM_003291    | 886  | 170 | -30.30 | CDS   | mRNA |
| UBN1      | NM_001288656 | 2657 | 173 | -31.55 | CDS   | mRNA |
| USP10     | NM_005153    | 1677 | 179 | -28.72 | CDS   | mRNA |
| USP12     | NM_182488    | 181  | 178 | -21.57 | CDS   | mRNA |
| USP48     | NM_032236    | 676  | 176 | -20.87 | CDS   | mRNA |
| WIZ       | NM_021241    | 1849 | 175 | -21.93 | 3'UTR | mRNA |
| WLS       | NM_024911    | 2117 | 171 | -30.28 | CDS   | mRNA |
| WNT5B     | NM_030775    | 105  | 170 | -29.37 | 3'UTR | mRNA |
| WSB1      | NM_134265    | 1007 | 171 | -25.48 | CDS   | mRNA |
| ZC3HAV1   | NM_020119    | 1419 | 170 | -20.15 | CDS   | mRNA |
| ZDHHC14   | NM_024630    | 45   | 184 | -26.56 | CDS   | mRNA |
| ZKSCAN1   | NM_003439    | 964  | 172 | -26.79 | CDS   | mRNA |
| ZNF107    | NM_016220    | 335  | 171 | -23.07 | CDS   | mRNA |
| ZNF202    | NM_003455    | 235  | 172 | -22.24 | 3'UTR | mRNA |
| ZNF34     | NM_030580    | 57   | 171 | -37.80 | CDS   | mRNA |
| ZNF396    | NM_145756    | 29   | 183 | -25.96 | 3'UTR | mRNA |
| ZNF425    | NM_001001661 | 19   | 177 | -24.42 | CDS   | mRNA |
| ZNF511    | NM_145806    | 407  | 175 | -32.18 | CDS   | mRNA |
| ZNF521    | NM_015461    | 317  | 172 | -40.73 | CDS   | mRNA |
| ZNF544    | NM_014480    | 663  | 175 | -30.81 | CDS   | mRNA |
| ZNF555    | NM_152791    | 55   | 188 | -26.86 | CDS   | mRNA |
| ZNF626    | NM_001076675 | 316  | 174 | -20.51 | CDS   | mRNA |

|        |              |     |     |        |       |      |
|--------|--------------|-----|-----|--------|-------|------|
| ZNF648 | NM_001009992 | 19  | 186 | -30.80 | 3'UTR | mRNA |
| ZNF649 | NM_023074    | 182 | 171 | -23.52 | CDS   | mRNA |
| ZNF720 | NM_001130913 | 471 | 187 | -37.64 | CDS   | mRNA |

**Supplementary Table S6H:** Putative DQ597960 piRNA target RNAs expressed in breast tumours. piRNAs targeting long non coding RNAs are shown in *italic*.

| Gene symbol     | RefSeq n.er      | Expression (normalized read count) | Alignment score | Energy (kcal/mol) | DQ597960 binding in RNA | Transcript category |
|-----------------|------------------|------------------------------------|-----------------|-------------------|-------------------------|---------------------|
| CLK2P           | NR_002711        | 20                                 | 176             | -38.35            | -                       | ncRNA (pseudogene)  |
| EMR4P           | NR_024075        | 1                                  | 171             | -41.73            | -                       | ncRNA (pseudogene)  |
| LOC729603       | NR_003288        | 9                                  | 171             | -23.37            | -                       | ncRNA (pseudogene)  |
| <i>FAM182B</i>  | <i>NR_026714</i> | <i>6</i>                           | <i>171</i>      | <i>-35.48</i>     | -                       | <i>lncRNA</i>       |
| <i>KIAA0125</i> | <i>NR_026800</i> | <i>1</i>                           | <i>171</i>      | <i>-36.61</i>     | -                       | <i>lncRNA</i>       |
| ABCA7           | NM_019112        | 170                                | 170             | -33.44            | CDS                     | mRNA                |
| ABCA9           | NM_080283        | 23                                 | 170             | -25.04            | CDS                     | mRNA                |
| ABCB1           | NM_000927        | 38                                 | 175             | -33.09            | CDS                     | mRNA                |
| ADAMTS10        | NM_030957        | 151                                | 171             | -33.76            | CDS                     | mRNA                |
| AHNAK           | NM_001620        | 21685                              | 172             | -34.68            | CDS                     | mRNA                |
| ARHGAP1         | NM_004308        | 4399                               | 176             | -28.88            | CDS                     | mRNA                |
| B4GALNT1        | NM_001478        | 60                                 | 170             | -28.62            | 3'UTR                   | mRNA                |
| BICD2           | NM_001003800     | 687                                | 171             | -37.07            | 3'UTR                   | mRNA                |
| BMF             | NM_033503        | 325                                | 171             | -28.72            | 3'UTR                   | mRNA                |
| BNC2            | NM_017637        | 315                                | 180             | -31.68            | CDS                     | mRNA                |
| C12orf76        | NM_207435        | 124                                | 170             | -30.17            | CDS                     | mRNA                |
| C17orf51        | NM_001113434     | 92                                 | 178             | -28.40            | 3'UTR                   | mRNA                |
| C19orf44        | NM_032207        | 143                                | 172             | -36.96            | CDS                     | mRNA                |
| C19orf48        | NM_032712        | 1239                               | 172             | -36.24            | 3'UTR                   | mRNA                |
| C1QB            | NM_000491        | 3122                               | 172             | -26.00            | CDS                     | mRNA                |
| C21orf59        | NM_021254        | 746                                | 172             | -30.15            | CDS                     | mRNA                |
| CACHD1          | NM_020925        | 134                                | 182             | -30.52            | 3'UTR                   | mRNA                |
| CARM1           | NM_199141        | 1391                               | 173             | -38.58            | 3'UTR                   | mRNA                |

|          |              |      |     |        |       |      |
|----------|--------------|------|-----|--------|-------|------|
| CCBE1    | NM_133459    | 6    | 170 | -33.32 | 3'UTR | mRNA |
| CCBL1    | NM_004059    | 57   | 171 | -32.57 | CDS   | mRNA |
| CCM2     | NM_031443    | 741  | 174 | -29.90 | CDS   | mRNA |
| CD93     | NM_012072    | 2317 | 180 | -36.15 | CDS   | mRNA |
| CDC20    | NM_001255    | 552  | 174 | -39.13 | CDS   | mRNA |
| CEBPG    | NM_001806    | 848  | 172 | -27.58 | 3'UTR | mRNA |
| CGNL1    | NM_032866    | 374  | 175 | -30.94 | 3'UTR | mRNA |
| CHIT1    | NM_003465    | 31   | 177 | -30.90 | CDS   | mRNA |
| COPS3    | NM_003653    | 714  | 174 | -24.65 | CDS   | mRNA |
| CRB2     | NM_173689    | 2    | 180 | -37.63 | CDS   | mRNA |
| CYP20A1  | NM_177538    | 440  | 182 | -36.00 | 3'UTR | mRNA |
| CYP46A1  | NM_006668    | 6    | 171 | -24.47 | CDS   | mRNA |
| DEDD2    | NM_133328    | 470  | 173 | -32.65 | 3'UTR | mRNA |
| DENND1C  | NM_024898    | 143  | 172 | -37.16 | CDS   | mRNA |
| DNAH3    | NM_017539    | 19   | 187 | -39.40 | CDS   | mRNA |
| DUSP13   | NM_001007271 | 3    | 172 | -34.23 | 3'UTR | mRNA |
| EMP2     | NM_001424    | 6842 | 170 | -28.38 | 3'UTR | mRNA |
| EMR2     | NM_013447    | 75   | 183 | -35.87 | CDS   | mRNA |
| EPS15L1  | NM_001258376 | 748  | 170 | -25.96 | 3'UTR | mRNA |
| ERBB4    | NM_005235    | 1013 | 171 | -29.35 | 3'UTR | mRNA |
| ESCO1    | NM_052911    | 472  | 170 | -22.42 | CDS   | mRNA |
| FAM83H   | NM_198488    | 2163 | 175 | -35.11 | 3'UTR | mRNA |
| FBLN2    | NM_001165035 | 2311 | 170 | -25.85 | 5'UTR | mRNA |
| FDPS     | NM_002004    | 4204 | 172 | -32.85 | CDS   | mRNA |
| FGFR4    | NM_002011    | 890  | 188 | -40.89 | 3'UTR | mRNA |
| FO XK2   | NM_004514    | 1661 | 170 | -30.36 | 3'UTR | mRNA |
| GABRA5   | NM_000810    | 2    | 171 | -30.31 | CDS   | mRNA |
| GAS7     | NM_201433    | 899  | 175 | -41.25 | 3'UTR | mRNA |
| GBP2     | NM_004120    | 2832 | 171 | -32.96 | 3'UTR | mRNA |
| GM PR2   | NM_016576    | 971  | 170 | -30.08 | 3'UTR | mRNA |
| GNE      | NM_005476    | 417  | 188 | -32.88 | 3'UTR | mRNA |
| GON4L    | NM_032292    | 1627 | 178 | -39.37 | CDS   | mRNA |
| GPR17    | NM_005291    | 3    | 183 | -39.29 | CDS   | mRNA |
| GPR179   | NM_001004334 | 7    | 172 | -29.60 | CDS   | mRNA |
| GSDMD    | NM_024736    | 994  | 182 | -37.72 | 3'UTR | mRNA |
| GXYLT1   | NM_173601    | 610  | 173 | -31.98 | 3'UTR | mRNA |
| HERC2    | NM_004667    | 688  | 340 | -55.65 | CDS   | mRNA |
| HLA-DPB1 | NM_002121    | 5032 | 184 | -31.04 | 3'UTR | mRNA |
| HMCN1    | NM_031935    | 1352 | 182 | -36.56 | CDS   | mRNA |
| HMHA1    | NM_001282334 | 582  | 170 | -34.54 | 5'UTR | mRNA |

|          |              |       |     |        |       |      |
|----------|--------------|-------|-----|--------|-------|------|
| HRNR     | NM_001009931 | 6     | 342 | -61.78 | CDS   | mRNA |
| HSPD1    | NM_002156    | 16965 | 176 | -35.88 | CDS   | mRNA |
| IER2     | NM_004907    | 1217  | 181 | -34.68 | 3'UTR | mRNA |
| IFI44L   | NM_006820    | 823   | 173 | -29.80 | CDS   | mRNA |
| INTS3    | NM_023015    | 3484  | 174 | -32.26 | 3'UTR | mRNA |
| INTS5    | NM_030628    | 682   | 182 | -37.14 | CDS   | mRNA |
| ITIH1    | NM_002215    | 1     | 177 | -30.69 | CDS   | mRNA |
| ITPR1    | NM_002222    | 900   | 173 | -31.04 | CDS   | mRNA |
| KIF13A   | NM_022113    | 1168  | 182 | -38.69 | CDS   | mRNA |
| KLF2     | NM_016270    | 631   | 170 | -33.95 | CDS   | mRNA |
| KLK2     | NM_005551    | 3     | 172 | -34.80 | CDS   | mRNA |
| KLK2     | NM_001002231 | 3     | 172 | -34.80 | 3'UTR | mRNA |
| LAD1     | NM_005558    | 7409  | 174 | -36.26 | 3'UTR | mRNA |
| LAMB1    | NM_002291    | 4289  | 174 | -31.18 | CDS   | mRNA |
| LGALS3BP | NM_005567    | 12161 | 173 | -38.57 | CDS   | mRNA |
| LIMD2    | NM_030576    | 216   | 172 | -35.48 | 3'UTR | mRNA |
| LIPH     | NM_139248    | 90    | 174 | -30.43 | 3'UTR | mRNA |
| LIX1L    | NM_153713    | 378   | 178 | -30.43 | CDS   | mRNA |
| LRAT     | NM_004744    | 2     | 170 | -29.90 | CDS   | mRNA |
| LRGUK    | NM_144648    | 18    | 182 | -32.84 | CDS   | mRNA |
| LRRC41   | NM_006369    | 1551  | 176 | -30.71 | CDS   | mRNA |
| MAP2     | NM_031847    | 62    | 170 | -32.29 | CDS   | mRNA |
| MAST2    | NM_015112    | 1059  | 173 | -27.94 | CDS   | mRNA |
| MBNL1    | NM_021038    | 2208  | 179 | -34.85 | 3'UTR | mRNA |
| MBP      | NM_001025100 | 207   | 170 | -24.29 | 3'UTR | mRNA |
| MECP2    | NM_004992    | 818   | 177 | -33.21 | 3'UTR | mRNA |
| MEX3C    | NM_016626    | 888   | 177 | -35.76 | 5'UTR | mRNA |
| MGAM     | NM_004668    | 3     | 345 | -63.02 | CDS   | mRNA |
| MLLT1    | NM_005934    | 2014  | 170 | -31.08 | 3'UTR | mRNA |
| MRC2     | NM_006039    | 4265  | 176 | -39.15 | CDS   | mRNA |
| MTMR4    | NM_004687    | 2040  | 173 | -27.71 | CDS   | mRNA |
| MUC16    | NM_024690    | 13    | 171 | -29.62 | CDS   | mRNA |
| MYEOV    | NM_138768    | 3     | 170 | -28.49 | 3'UTR | mRNA |
| MYO1E    | NM_004998    | 1238  | 174 | -30.57 | 3'UTR | mRNA |
| NCAM1    | NM_001076682 | 44    | 183 | -43.93 | 3'UTR | mRNA |
| NCOR2    | NM_006312    | 2499  | 175 | -33.58 | CDS   | mRNA |
| NPR1     | NM_000906    | 92    | 174 | -28.60 | CDS   | mRNA |
| NT5DC3   | NM_001031701 | 264   | 172 | -27.15 | 3'UTR | mRNA |
| ODF3     | NM_053280    | 2     | 173 | -31.40 | CDS   | mRNA |
| OSGIN1   | NM_182981    | 62    | 176 | -40.08 | CDS   | mRNA |

|          |              |      |     |        |       |      |
|----------|--------------|------|-----|--------|-------|------|
| PAPL     | NM_001004318 | 2    | 172 | -30.22 | CDS   | mRNA |
| PATZ1    | NM_014323    | 2226 | 179 | -42.53 | CDS   | mRNA |
| PATZ1    | NM_032052    | 2226 | 179 | -42.53 | 3'UTR | mRNA |
| PGLYRP2  | NM_052890    | 16   | 176 | -34.48 | CDS   | mRNA |
| PIGV     | NM_017837    | 319  | 173 | -28.80 | CDS   | mRNA |
| PLEKHG4B | NM_052909    | 119  | 171 | -28.44 | 3'UTR | mRNA |
| POFUT2   | NM_015227    | 446  | 177 | -36.49 | CDS   | mRNA |
| POFUT2   | NM_015227    | 446  | 173 | -35.77 | 3'UTR | mRNA |
| POLR3E   | NM_018119    | 1386 | 170 | -33.14 | 3'UTR | mRNA |
| POM121   | NM_172020    | 1374 | 170 | -28.46 | CDS   | mRNA |
| POM121C  | NM_001099415 | 648  | 170 | -28.46 | CDS   | mRNA |
| PPP1R12B | NM_002481    | 2411 | 170 | -29.21 | 3'UTR | mRNA |
| PPP1R9B  | NM_032595    | 2773 | 171 | -35.87 | 3'UTR | mRNA |
| PRCP     | NM_005040    | 3205 | 175 | -28.08 | 3'UTR | mRNA |
| PRKRIP1  | NM_024653    | 482  | 180 | -34.73 | CDS   | mRNA |
| PTP4A3   | NM_007079    | 427  | 180 | -33.72 | CDS   | mRNA |
| PYGO1    | NM_015617    | 9    | 170 | -27.62 | CDS   | mRNA |
| QARS     | NM_005051    | 2817 | 181 | -29.84 | CDS   | mRNA |
| RASEF    | NM_152573    | 194  | 176 | -32.66 | CDS   | mRNA |
| RASSF10  | NM_001080521 | 11   | 180 | -34.93 | CDS   | mRNA |
| RHBDL3   | NM_138328    | 44   | 171 | -33.66 | 3'UTR | mRNA |
| RHOD     | NM_014578    | 314  | 174 | -35.55 | CDS   | mRNA |
| RNF32    | NM_030936    | 28   | 170 | -30.83 | CDS   | mRNA |
| RSBN1L   | NM_198467    | 339  | 175 | -29.83 | CDS   | mRNA |
| SCAP     | NM_012235    | 1070 | 172 | -40.29 | CDS   | mRNA |
| SEMA4B   | NM_020210    | 2070 | 172 | -32.68 | CDS   | mRNA |
| SERPINA1 | NM_000295    | 950  | 174 | -31.22 | 3'UTR | mRNA |
| SERPINE2 | NM_006216    | 725  | 172 | -31.57 | CDS   | mRNA |
| SLC10A6  | NM_197965    | 9    | 172 | -28.70 | CDS   | mRNA |
| SLC2A10  | NM_030777    | 1595 | 172 | -31.79 | CDS   | mRNA |
| SLC35B2  | NM_178148    | 2190 | 171 | -37.77 | CDS   | mRNA |
| SLC6A7   | NM_014228    | 3    | 178 | -32.52 | CDS   | mRNA |
| SLIT1    | NM_003061    | 3    | 172 | -31.87 | 3'UTR | mRNA |
| STK11IP  | NM_052902    | 406  | 170 | -36.83 | CDS   | mRNA |
| TAPBP    | NM_172209    | 5593 | 171 | -32.93 | CDS   | mRNA |
| TBX15    | NM_152380    | 150  | 170 | -32.61 | CDS   | mRNA |
| TDRD9    | NM_153046    | 272  | 171 | -33.97 | CDS   | mRNA |
| TMCO6    | NM_018502    | 84   | 176 | -32.11 | CDS   | mRNA |
| TMEM201  | NM_001010866 | 310  | 171 | -35.66 | CDS   | mRNA |
| TNFRSF8  | NM_001243    | 17   | 188 | -40.36 | CDS   | mRNA |

|        |              |      |     |        |       |      |
|--------|--------------|------|-----|--------|-------|------|
| TRAF3  | NM_003300    | 172  | 170 | -37.44 | 3'UTR | mRNA |
| TRAM2  | NM_012288    | 1567 | 170 | -27.85 | 3'UTR | mRNA |
| TRIB3  | NM_021158    | 1348 | 173 | -32.13 | 3'UTR | mRNA |
| TRIOBP | NM_007032    | 1212 | 185 | -34.26 | 3'UTR | mRNA |
| TTC28  | NM_001145418 | 328  | 171 | -35.17 | CDS   | mRNA |
| TTC36  | NM_001080441 | 80   | 177 | -36.30 | CDS   | mRNA |
| UBE3C  | NM_014671    | 2310 | 172 | -39.81 | 3'UTR | mRNA |
| UST    | NM_005715    | 159  | 172 | -31.41 | CDS   | mRNA |
| VWDE   | NM_001135924 | 9    | 171 | -31.12 | CDS   | mRNA |
| ZEB2   | NM_014795    | 643  | 184 | -37.31 | CDS   | mRNA |
| ZMYM6  | NM_007167    | 244  | 180 | -35.86 | CDS   | mRNA |
| ZNF341 | NM_032819    | 186  | 176 | -27.35 | 3'UTR | mRNA |
| ZNF35  | NM_003420    | 108  | 173 | -32.34 | CDS   | mRNA |
| ZNF502 | NM_033210    | 121  | 170 | -35.70 | 3'UTR | mRNA |
| ZNF7   | NM_001282796 | 386  | 171 | -28.47 | 3'UTR | mRNA |

**Supplementary Table S6I:** Putative DQ570994 piRNA target RNAs expressed in breast tumours. piRNAs targeting long non coding RNAs are shown in *italic*.

| Gene symbol     | RefSeq n.er      | Expression (normalized read count) | Alignment score | Energy (kcal/mol) | DQ570994 binding in RNA | Transcript category |
|-----------------|------------------|------------------------------------|-----------------|-------------------|-------------------------|---------------------|
| GBAP1           | NR_002188        | 1872                               | 177             | -28.73            | -                       | ncRNA (pseudogene)  |
| LOC730668       | NR_027240        | 2                                  | 170             | -30.40            | -                       | ncRNA (pseudogene)  |
| <i>FLJ12825</i> | <i>NR_026655</i> | <i>10</i>                          | <i>177</i>      | <i>-31.93</i>     | -                       | <i>lncRNA</i>       |
| <i>KCNQ1OT1</i> | <i>NR_002728</i> | <i>79</i>                          | <i>176</i>      | <i>-27.27</i>     | -                       | <i>lncRNA</i>       |
| <i>LOC91450</i> | <i>NR_026998</i> | <i>1</i>                           | <i>173</i>      | <i>-35.59</i>     | -                       | <i>lncRNA</i>       |
| ACACA           | NM_198839        | 3161                               | 172             | -30.95            | 3'UTR                   | mRNA                |
| ATP5A1          | NM_004046        | 8499                               | 173             | -32.26            | CDS                     | mRNA                |
| ATP6V1C1        | NM_001695        | 1877                               | 175             | -33.42            | 3'UTR                   | mRNA                |
| B4GALNT2        | NM_153446        | 2                                  | 171             | -35.95            | CDS                     | mRNA                |
| BEND7           | NM_152751        | 51                                 | 172             | -26.84            | CDS                     | mRNA                |
| C1orf21         | NM_030806        | 2185                               | 180             | -29.82            | 3'UTR                   | mRNA                |
| C20orf194       | NM_001009984     | 245                                | 171             | -31.57            | CDS                     | mRNA                |
| CARHSP1         | NM_001278264     | 2006                               | 181             | -36.54            | 5'UTR                   | mRNA                |
| CARS2           | NM_024537        | 599                                | 173             | -28.43            | CDS                     | mRNA                |
| CBLB            | NM_170662        | 610                                | 181             | -35.91            | CDS                     | mRNA                |
| CCDC114         | NM_144577        | 7                                  | 179             | -35.39            | 3'UTR                   | mRNA                |

|          |              |      |     |        |       |      |
|----------|--------------|------|-----|--------|-------|------|
| CCR10    | NM_016602    | 6    | 171 | -32.33 | CDS   | mRNA |
| CHST1    | NM_003654    | 1605 | 175 | -34.57 | 3'UTR | mRNA |
| COL17A1  | NM_000494    | 429  | 175 | -31.15 | CDS   | mRNA |
| CUBN     | NM_001081    | 30   | 177 | -32.76 | CDS   | mRNA |
| DCLRE1C  | NM_022487    | 263  | 175 | -29.26 | CDS   | mRNA |
| DDX31    | NM_022779    | 469  | 174 | -35.49 | CDS   | mRNA |
| DNAJB2   | NM_006736    | 1543 | 173 | -35.54 | 3'UTR | mRNA |
| DOC2A    | NM_003586    | 7    | 171 | -25.86 | CDS   | mRNA |
| DUSP15   | NM_080611    | 77   | 173 | -34.08 | 5'UTR | mRNA |
| EFR3B    | NM_014971    | 41   | 190 | -39.41 | 3'UTR | mRNA |
| EHMT2    | NM_025256    | 1547 | 172 | -30.75 | 3'UTR | mRNA |
| ENDOD1   | NM_015036    | 730  | 170 | -37.74 | CDS   | mRNA |
| FAM120A  | NM_001286723 | 5286 | 172 | -38.08 | 3'UTR | mRNA |
| FAM172A  | NM_032042    | 359  | 172 | -29.78 | CDS   | mRNA |
| FAM178A  | NM_001243770 | 674  | 170 | -37.34 | 3'UTR | mRNA |
| FBXL12   | NM_017703    | 289  | 173 | -30.18 | CDS   | mRNA |
| FGD3     | NM_001083536 | 117  | 172 | -28.55 | 5'UTR | mRNA |
| FLCN     | NM_144997    | 283  | 170 | -31.30 | 3'UTR | mRNA |
| FOXD2    | NM_004474    | 45   | 171 | -27.42 | 5'UTR | mRNA |
| GBA      | NM_000157    | 6219 | 177 | -28.73 | 3'UTR | mRNA |
| GOLPH3L  | NM_018178    | 1803 | 172 | -26.72 | 3'UTR | mRNA |
| GPC1     | NM_002081    | 1064 | 171 | -31.05 | 3'UTR | mRNA |
| GPR114   | NM_153837    | 9    | 171 | -38.50 | 3'UTR | mRNA |
| GRHL2    | NM_024915    | 1356 | 171 | -30.25 | 3'UTR | mRNA |
| HPN      | NM_182983    | 866  | 185 | -35.59 | CDS   | mRNA |
| HTT      | NM_002111    | 1429 | 182 | -37.78 | 3'UTR | mRNA |
| IGF1     | NM_000618    | 247  | 171 | -28.37 | 3'UTR | mRNA |
| IL27     | NM_145659    | 2    | 170 | -30.42 | 3'UTR | mRNA |
| INSRR    | NM_014215    | 4    | 173 | -37.70 | CDS   | mRNA |
| IQGAP2   | NM_006633    | 655  | 170 | -22.67 | CDS   | mRNA |
| ITIH1    | NM_001166434 | 1    | 170 | -34.31 | 5'UTR | mRNA |
| ITIH1    | NM_002215    | 1    | 170 | -34.31 | CDS   | mRNA |
| ITSN2    | NM_147152    | 738  | 174 | -34.67 | 3'UTR | mRNA |
| KIAA1841 | NM_001129993 | 159  | 170 | -30.77 | 5'UTR | mRNA |
| LARP1    | NM_015315    | 3980 | 170 | -33.89 | 3'UTR | mRNA |
| LGR6     | NM_021636    | 12   | 172 | -33.49 | 3'UTR | mRNA |
| LIMK1    | NM_002314    | 1174 | 177 | -35.14 | 3'UTR | mRNA |
| LPIN1    | NM_145693    | 661  | 172 | -26.56 | CDS   | mRNA |
| LPP      | NM_001167672 | 389  | 170 | -30.21 | CDS   | mRNA |
| LRIG1    | NM_015541    | 2412 | 170 | -27.65 | CDS   | mRNA |

|          |              |      |     |        |       |      |
|----------|--------------|------|-----|--------|-------|------|
| LRPAP1   | NM_002337    | 1994 | 174 | -39.37 | 3'UTR | mRNA |
| LRRC8A   | NM_019594    | 1795 | 172 | -31.37 | 3'UTR | mRNA |
| MAP3K2   | NM_006609    | 704  | 183 | -35.49 | 3'UTR | mRNA |
| MIOS     | NM_019005    | 427  | 173 | -29.99 | CDS   | mRNA |
| MKMK1    | NM_003684    | 406  | 174 | -39.12 | CDS   | mRNA |
| MRFAP1L1 | NM_203462    | 1590 | 174 | -26.32 | 3'UTR | mRNA |
| MRPL40   | NM_003776    | 758  | 180 | -34.02 | CDS   | mRNA |
| MYO19    | NM_025109    | 1644 | 176 | -26.93 | 3'UTR | mRNA |
| NFKBIE   | NM_004556    | 358  | 172 | -34.34 | 3'UTR | mRNA |
| NUPL2    | NM_007342    | 211  | 186 | -33.59 | CDS   | mRNA |
| NXPH3    | NM_007225    | 163  | 175 | -34.42 | 3'UTR | mRNA |
| OBSCN    | NM_001271223 | 39   | 171 | -34.90 | CDS   | mRNA |
| OXCT2    | NM_022120    | 13   | 171 | -33.78 | 3'UTR | mRNA |
| PARVG    | NM_022141    | 162  | 181 | -38.64 | 3'UTR | mRNA |
| PDE1B    | NM_000924    | 136  | 170 | -28.62 | 3'UTR | mRNA |
| PDZD2    | NM_178140    | 885  | 172 | -36.61 | CDS   | mRNA |
| PKD1     | NM_000296    | 901  | 171 | -31.12 | CDS   | mRNA |
| PRKAG3   | NM_017431    | 7    | 171 | -30.78 | 3'UTR | mRNA |
| PRSS22   | NM_022119    | 64   | 171 | -37.51 | CDS   | mRNA |
| PSMD9    | NM_002813    | 1082 | 172 | -34.25 | 3'UTR | mRNA |
| PUS1     | NM_025215    | 910  | 173 | -33.77 | 5'UTR | mRNA |
| RANBP3   | NM_003624    | 1018 | 176 | -37.67 | 5'UTR | mRNA |
| RASSF1   | NM_170714    | 351  | 176 | -33.18 | 3'UTR | mRNA |
| RHBDL2   | NM_017821    | 188  | 170 | -26.86 | 5'UTR | mRNA |
| RTEL1    | NM_016434    | 208  | 170 | -34.39 | 5'UTR | mRNA |
| SCAF1    | NM_021228    | 1244 | 173 | -31.38 | CDS   | mRNA |
| SCARF2   | NM_182895    | 360  | 171 | -37.16 | 3'UTR | mRNA |
| SCNN1A   | NM_001159576 | 1972 | 171 | -31.83 | CDS   | mRNA |
| SHROOM4  | NM_020717    | 252  | 172 | -30.94 | CDS   | mRNA |
| SLC6A6   | NM_003043    | 2544 | 174 | -38.59 | 3'UTR | mRNA |
| SNAI3    | NM_178310    | 12   | 171 | -37.55 | 3'UTR | mRNA |
| SOCS4    | NM_080867    | 497  | 178 | -29.10 | CDS   | mRNA |
| SRGAP1   | NM_020762    | 337  | 171 | -27.58 | CDS   | mRNA |
| SSPO     | NM_198455    | 10   | 178 | -31.88 | CDS   | mRNA |
| STAR     | NM_000349    | 4    | 179 | -33.33 | CDS   | mRNA |
| STX16    | NM_003763    | 1149 | 175 | -34.85 | 5'UTR | mRNA |
| TARS2    | NM_025150    | 1125 | 171 | -29.97 | CDS   | mRNA |
| TBC1D20  | NM_144628    | 1266 | 177 | -33.60 | 3'UTR | mRNA |
| TCPI0L   | NM_144659    | 4    | 174 | -29.39 | 3'UTR | mRNA |
| TLR9     | NM_017442    | 8    | 173 | -31.00 | CDS   | mRNA |



|          |              |      |     |        |       |      |
|----------|--------------|------|-----|--------|-------|------|
| TMED1    | NM_006858    | 522  | 176 | -33.83 | 3'UTR | mRNA |
| TMEM184B | NM_012264    | 2108 | 170 | -32.10 | 3'UTR | mRNA |
| TMEM44   | NM_138399    | 152  | 172 | -31.19 | CDS   | mRNA |
| TMEM63A  | NM_014698    | 1219 | 178 | -37.15 | 3'UTR | mRNA |
| TNNI1    | NM_003281    | 74   | 188 | -36.57 | 3'UTR | mRNA |
| TTC39A   | NM_001080494 | 891  | 171 | -33.99 | CDS   | mRNA |
| TWF2     | NM_007284    | 947  | 175 | -32.96 | 3'UTR | mRNA |
| ULK2     | NM_014683    | 681  | 183 | -34.76 | CDS   | mRNA |
| UMODL1   | NM_173568    | 76   | 171 | -26.71 | CDS   | mRNA |
| VNN2     | NM_078488    | 54   | 171 | -29.36 | 3'UTR | mRNA |
| VSIG10   | NM_019086    | 606  | 174 | -31.48 | CDS   | mRNA |
| XRCC3    | NM_005432    | 205  | 172 | -28.45 | 3'UTR | mRNA |
| YKT6     | NM_006555    | 2363 | 171 | -37.45 | 3'UTR | mRNA |
| YPEL4    | NM_145008    | 12   | 183 | -47.88 | 3'UTR | mRNA |
| ZNF233   | NM_181756    | 14   | 173 | -31.89 | CDS   | mRNA |
| ZNF707   | NM_173831    | 201  | 179 | -32.49 | 3'UTR | mRNA |

**Supplementary Table S7:** Functional annotation analysis of biological processes involving the mRNAs targeted by 8 piRNAs differentially expressed in paired normal and tumor breast tissue samples identified in this study. For each biological process, all mRNAs involved are shown.

| Biological process                     | Transcripts                                                                                                                                                                                                                                                                                                                                                                                                                                                                                                                                                                                                                                                                                                                                                                                                                                                                                                                                                                                                                                        | n. of transcripts |
|----------------------------------------|----------------------------------------------------------------------------------------------------------------------------------------------------------------------------------------------------------------------------------------------------------------------------------------------------------------------------------------------------------------------------------------------------------------------------------------------------------------------------------------------------------------------------------------------------------------------------------------------------------------------------------------------------------------------------------------------------------------------------------------------------------------------------------------------------------------------------------------------------------------------------------------------------------------------------------------------------------------------------------------------------------------------------------------------------|-------------------|
| Cancer                                 | <p>ABCB1, ABCC5, ADAM10, AHNAK, ALDOC, ARHGAP11A, ARHGAP20, ARHGEF11, ARMC8, ARMCX5, ASH2L, ATP10D, ATP5A1, BBS9, BICD2, BSN, BTN3A3, C1GALT1, C1S, CARS, CBX5, CC2D1B, CCM2, CEP350, CHTF18, CHTF8, CSGALNACT2, CUX1, DAAM1, DCLRE1C, DGKI, DHRS12, DNAH3, DOT1L, DR1, DSCR3, EHMT2, EPB41L1, ESR1, F5, FAM102A, FEN1, FOXK2, FRK, FURIN, G3BP1, G6PD, GLS, GPAM, GPC1, GPT2, GUCY1A3, HDLBP, HIC2, HIF1A, HIP1, HK2, HNRNPUL1, HS2ST1, HTT, IGF1, KCNAB1, KCTD3, KIAA0196, KRAS, LAG3, LAP3, LONP1, LPIN2, LPP, LRIG1, LRP2, LRRN3, MAST3, MBNL1, MECP2, MED23, MIA3, MKI67, MLLT1, MYO1D, NCAPH2, NCDN, NCOA6, NEFL, NOS3, NOTCH2, NPAS1, NRXN3, NSD1, NUCKS1, NUP188, OSGIN1, PAK7, PELP1, PHF20, PID1, PLA1A, POLA1, POLH, POLR2B, POMC, POMT2, PRKDC, PTPN4, PTPRJ, RABGAP1, RASSF1, RBMX, RBPJ, RCOR1, RCOR3, RECK, RELN, RNF123, RNF14, ROCK2, RYR3, SDC3, SFRP1, SFRP2, SLC2A4, SLC39A8, SLCO3A1, SNX1, SPAG9, TFDP2, TMEM2, TMTC2, TPP2, TRANK1, TRIM2, UBA52, UBN1, UMODL1, USP10, USP24, VPS13B, VPS13C, WEE1, WIZ, XRCC5, ZDHHC21</p> | 143               |
| Cell-To-Cell Signaling and Interaction | <p>ABCB6, ABCC1, ABI1, ACTR2, ADAMTS7, ADORA3, AGAP2, AIMP1, ALDH3A2, ARF4, ARHGAP1, ARHGEF5, ASAP2, ATP9A, C12orf76, C5, CALCOCO1, CCDC144B, CCL18, CCR10, CD163, CD34, CDH3, CDH4, CDK5RAP2, CHRM1, CHST2, COL13A1, COL7A1, CPEB1, CR1, CTNND2, CYP46A1, DBH, DDC, DHCR7, DHRS2, DICER1, DLC1, DNNTIP1, EIF1AX, ELF3, ENDOD1, ENPP2, EPS8L1, EZR, FGF12, FGFR4, FPR1, GBP2, GCH1, GPR126, GRN, HEXB, IKZF3, IL21R, IL34, IRAK1, IRAK2, ITGAV, ITGB2, ITGB5, ITPR1, ITSN1, JARID2, KLF13, KLK2, KRT18, KRT80, LEF1, LGALS8, LIPG, LRIG1, LRRC32, LSS, MAN1A1, MGRN1, MKL1, MLF2, MN1, MRAS, MSTN, MUC6, MYB, NCKAP1, NDFIP2, NEU1, NFKBIE, NID1, NKD1, P2RY2, PARVA, PARVG, PCDH19, PCDH7, PCSK6, PDE4D, PDPN, PFKL, PGC, PGR, PKD1, PLXNA1, PTGS1, PTP4A3, PTPRE, PXN, RAPH1, RASSF1, RTN1, RYR1, RYR2, SDCBP, SELP, SERF2, SERPINA1, SIT1, SLC26A2, SLC7A1, STX16, SYNPO, TENC1, TLR9, TNF, TNFRSF8, TRAF3, TRRAP, TSPYL2, VANGL2, VCL, WNT5B, ZEB2</p>                                                                                         | 132               |

|                                    |                                                                                                                                                                                                                                                                                                                                                                                                                                                                                                                                                                                                                                                                                                                                                                                         |     |
|------------------------------------|-----------------------------------------------------------------------------------------------------------------------------------------------------------------------------------------------------------------------------------------------------------------------------------------------------------------------------------------------------------------------------------------------------------------------------------------------------------------------------------------------------------------------------------------------------------------------------------------------------------------------------------------------------------------------------------------------------------------------------------------------------------------------------------------|-----|
| Cell Death and Survival            | ABCC4, ADAM15, AKR1C1/AKR1C2, AKT3, ALDOC, ANGPT2, APLNR, APOL1, ASH2L, AUTS2, BCL2L11, BICD2, BIRC5, BMF, C5, CARS, CCL18, CD163, CHST2, CHTF18, CHTF8, CR1, CRKL, DAXX, DCLRE1C, DHX58, ELF3, ELK4, ERBB4, ERN1, FEN1, FOSL1, FOXK2, FURIN, GARS, GCH1, GLE1, GNE, GPR126, HEXB, HIF1A, HIP1, HK2, HTT, IFIT2, IL15, IL21R, IL7, IRAK1, IRAK2, ITPR1, JAK1, JARID2, KLHL2, KRAS, LAD1, LIPG, LRIG1, LSS, MAP3K11, MAP3K5, MRAS, NCOA6, NFKBIE, NID1, NOTCH2, NUCKS1, NUPL2, OSGIN1, PDPK1, PDPN, PELP1, PLCG2, POLH, POLR2B, POMC, PPP2R1A, PRKDC, PSAT1, PTGS1, PTPN13, QARS, RAPH1, RASSF1, RBPJ, RUNX3, SCN3A, SLC16A6, SLC4A7, SLC7A1, STX16, SYNPO, SYT11, TAF1, TAF11, TFDP2, TINAGL1, TLR9, TNF, TRAF3, TRIB3, TRIOBP, TSLP, TTC28, TYK2, USP12, WEE1, XRCC5, ZC3H12A, ZC3HAV1 | 110 |
| Cell Cycle                         | AMOTL1, ARHGAP20, ARMC8, ARMCX5, ATP10D, ATRIP, BBS9, BCL11B, C12orf76, C1GALT1, CALCOCO1, CARD10, CC2D1A, CC2D1B, CCM2, CDK5RAP2, CPEB1, DAAM1, DES, EHMT2, ENDOD1, ENPP2, EPB41L1, ERAP1, FAF1, FRK, GPC1, GUCY1A3, HERC2, HRH3, HSPD1, IFI30, IKZF3, JKAMP, KLF2, KRT80, MIA3, MLF2, MTA3, MYO1D, MYO1E, NCOR2, NEFL, NPAS1, NRXN3, NUP62, PDCD11, PFKL, PGC, PHF20, PIAS4, PLXNA1, PPP4R1, PTPN4, PTPRJ, RASSF1, RBMX, RCOR1, RCOR3, RECK, RNF31, ROCK2, RYR3, SERF2, SFRP2, SLAMF1, SPAG9, STAR, TAX1BP1, UBN1, VANGL2, VCAM1                                                                                                                                                                                                                                                      | 72  |
| Cellular Assembly and Organization | ABCB11, ABCC8, ACO2, ANK2, APC, APLP2, ARF1, ARFIP1, CEL, COL18A1, DIO2, DTNA, F2RL1, FES, FLNA, GBA, HIGD1A, IL27, INSR, LIMK1, LIMK2, MAP3K7, MAPKAP1, MAPKAPK3, MAPT, MKNK1, MTOR, NPR1, NT5C2, PAWR, PDCD6IP, PDHB, PDZD2, PLD2, PODXL, PSEN1, PSMC4, PSMD1, PTPN2, SCAMP1, SCNN1A, SCNN1B, SPRY2, SPTBN1, TJP1, TNRC6A, TRO, TTBK1, USP18, XAF1, XRCC3                                                                                                                                                                                                                                                                                                                                                                                                                             | 51  |
| Cell Morphology                    | ACTA2, AKR1C1/AKR1C2, AKT3, ANGPT2, ANXA6, APLNR, ARHGEF12, AXIN2, BCL2L11, BIRC5, BMF, BMP7, BMPER, CEBPZ, CSPG4, DAXX, DMP1, DPYSL2, EFNB2, ELK4, ERBB4, FAF2, FBLN2, FOSL1, GAB2, GARS, GLE1, GNE, HGF, IGF1, ITGA3, JAK1, KCNMA1, MAP3K11, MAP3K5, MUC5B, NUPL2, PAK2, PDPK1, PSAT1, PTPN13, QARS, RUNX2, RUNX3, SACS, SIM2, SLC4A7, TRDN, TRIB3, USP12                                                                                                                                                                                                                                                                                                                                                                                                                             | 50  |
| Cellular Movement                  | ACTA2, ADAMTS7, ADORA3, AGAP2, ASAP2, BMP1, CENPE, CHRM1, CLEC2D, CYP46A1, DLC1, FGFR4, FPR1, GOPC, GRN, IL34, ITGA3, ITGAV, ITGB2, ITGB5, ITSN1, LGALS8, MFN1, MGRN1, NEU1, P2RY2, PARVA, PARVG, PINK1, PMEPA1, PTP4A3, PTPRE, PXN, RHOD, SDCBP, SLC9A2, SLC9A3, SMTN, STRADA, TENC1, TGFBI, TSPYL2, VCL                                                                                                                                                                                                                                                                                                                                                                                                                                                                               | 43  |

|                                           |                                                                                                                                                                                                                                                                                             |    |
|-------------------------------------------|---------------------------------------------------------------------------------------------------------------------------------------------------------------------------------------------------------------------------------------------------------------------------------------------|----|
| Tissue Morphology                         | ACTA2, AKNA, ALDH6A1, ANXA6, ARHGEF12, AXIN2, BMP7, BMPER, CEBPG, CEBPZ, CSPG4, DMP1, DPYSL2, EFNB2, EMP2, FAF2, FBLN2, GAB2, GABRE, GPR98, GRHL2, HGF, IGF1, ITGA3, KCNMA1, MED13, MUC5B, NDUFV3, NUP210, PAK2, PCDHA9, PTBP2, RUNX2, SACS, SIM2, SLC37A4, SORCS1, TRDN, TRIB3, VAPA, YKT6 | 41 |
| Gene Expression                           | ABL2, ARMCX5, ATP10D, BBS9, CCM2, CDC23, EHMT2, EPB41L1, FRK, GGCX, GPC1, GRIA4, HOMER1, IKZF2, MEX3C, MIA3, MYH10, NEFL, NRXN3, PHF20, PSMD9, PTPRJ, RAB34, RCOR1, RCOR3, RGS1, SCN2A, SFRP2, SLC35B2, SLC6A6, SPAG9, TEP1                                                                 | 32 |
| DNA Replication, Recombination and Repair | ALDOC, ASH2L, BICD2, CARS, CHTF18, CHTF8, DCLRE1C, FEN1, FOXK2, FURIN, HIF1A, HIP1, HK2, HTT, KRAS, NCOA6, NOTCH2, NUCKS1, OSGIN1, PELP1, POLH, POLR2B, POMC, PRKDC, RBPJ, TFDP2, WEE1, XRCC5                                                                                               | 28 |
| Cell Signaling                            | ARHGEF11, ATP5A1, BSN, DNAH3, G3BP1, HDLBP, KCNAB1, KCTD3, KIAA0196, NCDN, PAK7, PLA1A, SDC3, SLCO3A1, SNX1, UBA52, USP10, USP24                                                                                                                                                            | 18 |
| Organ Morphology                          | AKNA, ALDH6A1, CEBPG, EMP2, GABRE, GPR98, GRHL2, MED13, NDUFV3, NUP210, PCDHA9, PTBP2, SLC37A4, SORCS1, TRIB3, VAPA, YKT6                                                                                                                                                                   | 17 |
| Tumor Morphology                          | ARHGAP20, ARMC8, C1GALT1, CC2D1B, DAAM1, GUCY1A3, MYO1D, NPAS1, PTPN4, PTPRJ, RASSF1, RBMX, RECK, ROCK2, RYR3, UBN1                                                                                                                                                                         | 16 |
